# Supplementary material for: The clonal structure and dynamics of the human T cell response to an organic chemical hapten
Source: eLife. 2021 Jan 12;10:e54747. doi: 10.7554/eLife.54747 (PMC7880692; doi:10.7554/eLife.54747)
Supplement: Figure 7—source data 1. — The list of TCRs which is used as the DPC set to generate the DBN which is illustrated in Figure 7. Each row contains a unique combination of CDR3 sequence, V gene, and J gene annotation. [file elife-54747-fig7-data1.csv]

CDR3	V	J
CASSLAQGWAEAFF	TRBV6-1*01	TRBJ1-1*01
CASSYSGINEQFF	TRBV6-5*01	TRBJ2-1*01
CASSPTLWQGIASEQYF	TRBV12-4*01	TRBJ2-7*01
CASSLVGRPYF	TRBV7-6*01	TRBJ2-5*01
CASSSAQDYQETQYF	TRBV7-9*01	TRBJ2-5*01
CASSDGGLDTQYF	TRBV4-1*01	TRBJ2-3*01
CASSGRGLADTQYF	TRBV9*01	TRBJ2-3*01
CSDGGQGAEAFF	TRBV29-1*01	TRBJ1-1*01
CASSLAPAGADEQYF	TRBV7-9*01	TRBJ2-7*01
CASSQDPVAANEKLFF	TRBV4-1*01	TRBJ1-4*01
CASSQTVLAGVHEQYF	TRBV4-1*01	TRBJ2-7*01
CALLAGDEQYF	TRBV10-3*01	TRBJ2-7*01
CASSQGLGYTF	TRBV4-2*01	TRBJ1-2*01
CASRSDSASQETQYF	TRBV7-3*01	TRBJ2-5*01
CASSPRDSPTGELFF	TRBV7-9*01	TRBJ2-2*01
CAISGSRGDTQYF	TRBV10-3*01	TRBJ2-3*01
CASSLPGQGPYEQYF	TRBV18*01	TRBJ2-7*01
CASSPGPSSTDTQYF	TRBV4-1*01	TRBJ2-3*01
CASSGSPSSLGNEQFF	TRBV7-3*01	TRBJ2-1*01
CASSSSWGNNSPLHF	TRBV11-2*01	TRBJ1-6*01
CASSQGPGQWDEQYF	TRBV4-1*01	TRBJ2-7*01
CASRRTGTTNQPQHF	TRBV28*01	TRBJ1-5*01
CASSQDPNSWVTEAFF	TRBV4-1*01	TRBJ1-1*01
CASSQGIQLEKLFF	TRBV4-1*01	TRBJ1-4*01
CSAGKTSGGVFKYNEQFF	TRBV20-1*01	TRBJ2-1*01
CSAIRVGSGAIGELFF	TRBV20-1*01	TRBJ2-2*01
CASSLQTRDRGTETQYF	TRBV6-5*01	TRBJ2-5*01
CASKGLGNQPQHF	TRBV25-1*01	TRBJ1-5*01
CASSVGQGWNTEAFF	TRBV5-1*01	TRBJ1-1*01
CASSQDGRAGNTIYF	TRBV4-1*01	TRBJ1-3*01
CASSLTPTVHGRETQYF	TRBV6-5*01	TRBJ2-5*01
CASSLTGAELFF	TRBV7-9*01	TRBJ2-2*01
CASSQGSNTGELFF	TRBV4-3*01	TRBJ2-2*01
CASSQDRAGTALEGYTF	TRBV3-1*01	TRBJ1-2*01
CASSVGQSGEQYF	TRBV9*01	TRBJ2-7*01
CASSSLFLGGNQPQHF	TRBV28*01	TRBJ1-5*01
CASSAPSMGVKLYEQYF	TRBV25-1*01	TRBJ2-7*01
CASSHPTGVVEQYF	TRBV7-9*01	TRBJ2-7*01
CASSLTGDTSPLHF	TRBV28*01	TRBJ1-6*01
CSVGWGAYGYTF	TRBV29-1*01	TRBJ1-2*01
CASSTFDRGDSPLHF	TRBV4-3*01	TRBJ1-6*01
CASSAREPSGTQYF	TRBV11-2*01	TRBJ2-5*01
CASSAVGTSVHTQYF	TRBV12-4*01	TRBJ2-3*01
CASGLQGGYEQYF	TRBV6-5*01	TRBJ2-7*01
CASSQDGGSYNEQFF	TRBV4-3*01	TRBJ2-1*01
CASSRAGELSGANVLTF	TRBV5-4*01	TRBJ2-6*01
CASGLASGELFF	TRBV12-4*01	TRBJ2-2*01
CASSLIGASGETQYF	TRBV11-2*01	TRBJ2-5*01
CASSLLGARTGELFF	TRBV5-1*01	TRBJ2-2*01
CASSLLAGLWDEQFF	TRBV7-8*01	TRBJ2-1*01
CASSPGALNTEAFF	TRBV7-3*01	TRBJ1-1*01
CASSLGSPGQGLYEQYF	TRBV7-8*01	TRBJ2-7*01
CSVPSNTDTQYF	TRBV29-1*01	TRBJ2-3*01
CASSLGGNEQFF	TRBV4-1*01	TRBJ2-1*01
CASSWGTGGLREQYF	TRBV12-4*01	TRBJ2-7*01
CASSLSSGRGQSYGYTF	TRBV27*01	TRBJ1-2*01
CASSLKGRASYEQYF	TRBV12-4*01	TRBJ2-7*01
CASSQLRGLLQETQYF	TRBV14*01	TRBJ2-5*01
CASIPHELTDTQYF	TRBV5-6*01	TRBJ2-3*01
CASSPGQDNEKLFF	TRBV4-1*01	TRBJ1-4*01
CASSQMTGVLTGELFF	TRBV4-1*01	TRBJ2-2*01
CASSEIGFEADTQYF	TRBV2*01	TRBJ2-3*01
CASSSPGGREAFF	TRBV6-1*01	TRBJ1-1*01
CASSQSYNSPLHF	TRBV4-1*01	TRBJ1-6*01
CASSQVNKVDGYTF	TRBV4-1*01	TRBJ1-2*01
CASSEAVYGEQFF	TRBV2*01	TRBJ2-1*01
CATSVGGFTDEQFF	TRBV15*01	TRBJ2-1*01
CASSLTPGLAGGGGETQYF	TRBV7-8*01	TRBJ2-5*01
CASSQEGGPGRGELFF	TRBV3-1*01	TRBJ2-2*01
CAMGRDNEKLFF	TRBV2*01	TRBJ1-4*01
CASSQDSRSTGELFF	TRBV4-1*01	TRBJ2-2*01
CASSPRRVGLAGELFF	TRBV7-8*01	TRBJ2-2*01
CASRTGYSYEQYF	TRBV6-1*01	TRBJ2-7*01
CASSLVKPEAFF	TRBV11-2*01	TRBJ1-1*01
CATSRASRVTDTQYF	TRBV15*01	TRBJ2-3*01
CASSQDSFPAGRTGELFF	TRBV3-1*01	TRBJ2-2*01
CASSPGLSLSYEQYF	TRBV7-2*01	TRBJ2-7*01
CASSQDRYTEAFF	TRBV4-3*01	TRBJ1-1*01
CASSQDGVPDTQYF	TRBV3-1*01	TRBJ2-3*01
CSVAWGNEQFF	TRBV29-1*01	TRBJ2-1*01
CASSSLTEAFF	TRBV4-1*01	TRBJ1-1*01
CASSGDYTDTQYF	TRBV10-2*01	TRBJ2-3*01
CASSYTGEVETQYF	TRBV6-5*01	TRBJ2-5*01
CASSYSATGYGYTF	TRBV6-1*01	TRBJ1-2*01
CSARGTGEIAGDPYEQYF	TRBV20-1*01	TRBJ2-7*01
CASSLLQGNTEAFF	TRBV12-4*01	TRBJ1-1*01
CASSPDARESPLHF	TRBV4-1*01	TRBJ1-6*01
CANNIQIRGDTEAFF	TRBV7-3*01	TRBJ1-1*01
CASIPNDSGNTIYF	TRBV12-4*01	TRBJ1-3*01
CASSQDPGSYEQYF	TRBV4-1*01	TRBJ2-7*01
CASSSPQRGGDEQFF	TRBV6-5*01	TRBJ2-1*01
CASSLRTGKPSGNTIYF	TRBV7-6*01	TRBJ1-3*01
CASSQTGLYEQYF	TRBV4-1*01	TRBJ2-7*01
CASSPGAGYNEQFF	TRBV4-1*01	TRBJ2-1*01
CASSGSPGQFSYGYTF	TRBV12-4*01	TRBJ1-2*01
CSAPEGTGDTQYF	TRBV20-1*01	TRBJ2-3*01
CASSLGTRPDTQYF	TRBV11-2*01	TRBJ2-3*01
CASSPLFAEVAKNIQYF	TRBV7-8*01	TRBJ2-4*01
CSVPTDTGELFF	TRBV29-1*01	TRBJ2-2*01
CASSPDGGLYEQYF	TRBV9*01	TRBJ2-7*01
CSARLSPTSGMGDTQYF	TRBV20-1*01	TRBJ2-3*01
CASSLVGLAAITDTQYF	TRBV7-8*01	TRBJ2-3*01
CASSSWGTGELFF	TRBV6-5*01	TRBJ2-2*01
CASSQEPAVPYEQFF	TRBV4-1*01	TRBJ2-1*01
CASSLAAGMDTEAFF	TRBV7-9*01	TRBJ1-1*01
CASSFRLAGGLGDTQYF	TRBV28*01	TRBJ2-3*01
CSAPLGYEQYF	TRBV20-1*01	TRBJ2-7*01
CASSWGTGLVEQYF	TRBV27*01	TRBJ2-7*01
CASSPRVAGVYEQYF	TRBV28*01	TRBJ2-7*01
CASSIGQRNQPQHF	TRBV28*01	TRBJ1-5*01
CASSLEPGTEAFF	TRBV7-8*01	TRBJ1-1*01
CASSSRDSPYEQYF	TRBV27*01	TRBJ2-7*01
CASSQGPRDRGRGTEAFF	TRBV4-1*01	TRBJ1-1*01
CASSARSGPDNEQFF	TRBV9*01	TRBJ2-1*01
CASSHTGGSSGGDQLF	TRBV27*01	TRBJ2-1*01
CASSYGGIDTQYF	TRBV6-6*01	TRBJ2-3*01
CASSPGGTASYEQYF	TRBV9*01	TRBJ2-7*01
CASSPGQGYNEQFF	TRBV4-1*01	TRBJ2-1*01
CASSRSSGSYNSPLHF	TRBV5-4*01	TRBJ1-6*01
CASSSWTGTSDEQYF	TRBV6-5*01	TRBJ2-7*01
CASSLVGTEAFF	TRBV5-4*01	TRBJ1-1*01
CASSPERGQGYF	TRBV4-1*01	TRBJ2-3*01
CASSFDQPQHF	TRBV28*01	TRBJ1-5*01
CASRTGPELFF	TRBV7-2*01	TRBJ2-2*01
CASSAGGSTFYEQYF	TRBV7-9*01	TRBJ2-7*01
CSASIKRTGISNQPQHF	TRBV20-1*01	TRBJ1-5*01
CASSQDPASGGYGELFF	TRBV4-1*01	TRBJ2-2*01
CSASREGYTF	TRBV20-1*01	TRBJ1-2*01
CASNDLRCNQPQHF	TRBV14*01	TRBJ1-5*01
CASSYDGGGETQYF	TRBV6-1*01	TRBJ2-5*01
CASSPVGQGVQPQHF	TRBV27*01	TRBJ1-5*01
CSVVKTADGYTF	TRBV29-1*01	TRBJ1-2*01
CASSPQTLSPQHF	TRBV12-4*01	TRBJ1-5*01
CASSEFKATYEQYF	TRBV6-1*01	TRBJ2-7*01
CASSDRGPTGELFF	TRBV25-1*01	TRBJ2-2*01
CATSDSWTGETGELFF	TRBV24-1*01	TRBJ2-2*01
CASGRDFNQPQHF	TRBV6-5*01	TRBJ1-5*01
CASSLSRGEQFF	TRBV27*01	TRBJ2-1*01
CASSQEAGVSYEQYF	TRBV4-3*01	TRBJ2-7*01
CASSHGYRGTYEQYF	TRBV27*01	TRBJ2-7*01
CASSSAGGGELFF	TRBV4-1*01	TRBJ2-2*01
CASSVLGDSPLHF	TRBV6-6*01	TRBJ1-6*01
CASSTGTARYGYTF	TRBV5-6*01	TRBJ1-2*01
CASSPPRLAEQFF	TRBV4-1*01	TRBJ2-1*01
CSASRTGSGGYNEQFF	TRBV20-1*01	TRBJ2-1*01
CSLLGQMNTEAFF	TRBV20-1*01	TRBJ1-1*01
CASRLGRHNEQFF	TRBV7-6*01	TRBJ2-1*01
CASSQGGIYEQYF	TRBV4-2*01	TRBJ2-7*01
CASSSPGRDVTDTQYF	TRBV27*01	TRBJ2-3*01
CASSPLAGPNQPQHF	TRBV27*01	TRBJ1-5*01
CASSPEAYSGANVLTF	TRBV6-1*01	TRBJ2-6*01
CASSLTDTQYF	TRBV28*01	TRBJ2-3*01
CASSRSLAEYYEQYF	TRBV4-3*01	TRBJ2-7*01
CAISESSYEQYF	TRBV10-3*01	TRBJ2-7*01
CASSPEGQRISYEQYF	TRBV27*01	TRBJ2-7*01
CASSQVRGYNEQFF	TRBV4-3*01	TRBJ2-1*01
CASSSRDRAYEQYF	TRBV27*01	TRBJ2-7*01
CASTKDGGGYGYTF	TRBV18*01	TRBJ1-2*01
CASPGGNTEAFF	TRBV2*01	TRBJ1-1*01
CASSQDVWQATDTQYF	TRBV4-1*01	TRBJ2-3*01
CASSPLTNTGELFF	TRBV7-6*01	TRBJ2-2*01
CAGQRGLGDTQYF	TRBV5-4*01	TRBJ2-3*01
CANPPVRGPNTGELFF	TRBV7-8*01	TRBJ2-2*01
CASFGAVGKLFF	TRBV28*01	TRBJ1-4*01
CASSFGPFYEQYF	TRBV27*01	TRBJ2-7*01
CASNSPPNTEAFF	TRBV14*01	TRBJ1-1*01
CATSRGRASTDTQYF	TRBV15*01	TRBJ2-3*01
CASSQDGTRVDEQFF	TRBV4-2*01	TRBJ2-1*01
CASSQEGGTEAFF	TRBV4-1*01	TRBJ1-1*01
CASTATNTEAFF	TRBV12-5*01	TRBJ1-1*01
CSAPRVSELAKNIQYF	TRBV20-1*01	TRBJ2-4*01
CASSQERTGIWTGELFF	TRBV3-1*01	TRBJ2-2*01
CASSSPRRLSYEQYF	TRBV7-9*01	TRBJ2-7*01
CASSSRILNEKLFF	TRBV7-6*01	TRBJ1-4*01
CASSFVTVNTEAFF	TRBV6-1*01	TRBJ1-1*01
CASSLDSVGYEQYF	TRBV7-8*01	TRBJ2-7*01
CASSLWDSSYEQYF	TRBV13*01	TRBJ2-7*01
CSARSPGYEQYF	TRBV20-1*01	TRBJ2-7*01
CASSPLTGFSYEQYF	TRBV7-9*01	TRBJ2-7*01
CASSLMAGYTDTQYF	TRBV5-8*01	TRBJ2-3*01
CASGRGPPRDGYTF	TRBV6-5*01	TRBJ1-2*01
CASSLPSGTSGSVYNEQFF	TRBV7-6*01	TRBJ2-1*01
CASRPGDTGELFF	TRBV2*01	TRBJ2-2*01
CASSTQRAQYF	TRBV6-5*01	TRBJ2-7*01
CASRRTGYTGELFF	TRBV27*01	TRBJ2-2*01
CSAPIPRRGGQETQYF	TRBV20-1*01	TRBJ2-5*01
CASSIREYPPYNEQFF	TRBV7-3*01	TRBJ2-1*01
CASSATPGYEQYF	TRBV6-5*01	TRBJ2-7*01
CASSLWGKEETQYF	TRBV27*01	TRBJ2-5*01
CASSGSLAGRTDTQYF	TRBV7-2*01	TRBJ2-3*01
CASSSKIGTGPAYEQYF	TRBV7-8*01	TRBJ2-7*01
CASSSGTSGGTDTQYF	TRBV11-2*01	TRBJ2-3*01
CASSPRQGPQETQYF	TRBV28*01	TRBJ2-5*01
CSAEGGHVRDTQYF	TRBV20-1*01	TRBJ2-3*01
CASSLAWGRALMNTEAFF	TRBV7-8*01	TRBJ1-1*01
CASSVDGGESYEQYF	TRBV9*01	TRBJ2-7*01
CSVLSHGELFF	TRBV20-1*01	TRBJ2-2*01
CASSLTGIGYTF	TRBV12-4*01	TRBJ1-2*01
CASSPGQSYEQYF	TRBV4-1*01	TRBJ2-7*01
CASSSTSGGLFSSTDTQYF	TRBV6-9*01	TRBJ2-3*01
CASSQDHGGAKFF	TRBV4-1*01	TRBJ2-1*01
CASSRMGDGYTF	TRBV3-1*01	TRBJ1-2*01
CASRPQGAGEKLFF	TRBV2*01	TRBJ1-4*01
CASSQEGQGFFTGELFF	TRBV4-2*01	TRBJ2-2*01
CSVPARNPYEQYF	TRBV29-1*01	TRBJ2-7*01
CASSPREPGYGYTF	TRBV9*01	TRBJ1-2*01
CATSPSGSTEQFF	TRBV24-1*01	TRBJ2-1*01
CASSWVPNTEAFF	TRBV27*01	TRBJ1-1*01
CASSLGHTPSGELFF	TRBV7-3*01	TRBJ2-2*01
CASSQSVDLVLNTEAFF	TRBV4-3*01	TRBJ1-1*01
CASSLGLQGMNTEAFF	TRBV5-1*01	TRBJ1-1*01
CASSRAVGGTYNEQFF	TRBV4-3*01	TRBJ2-1*01
CAISEPGGPHEQFF	TRBV10-3*01	TRBJ2-1*01
CASSLRTDPLSPLHF	TRBV5-1*01	TRBJ1-6*01
CASSPGTSGSSDEQYF	TRBV28*01	TRBJ2-7*01
CASSVLGIGLGTFF	TRBV2*01	TRBJ1-1*01
CASSQDPGANVLTF	TRBV4-1*01	TRBJ2-6*01
CASSDFDRSNQPQHF	TRBV6-1*01	TRBJ1-5*01
CASRTGNYGYTF	TRBV6-5*01	TRBJ1-2*01
CASSQGFWTTEAFF	TRBV4-2*01	TRBJ1-1*01
CASSQDPRSNQPQHF	TRBV4-1*01	TRBJ1-5*01
CSVTRANEQFF	TRBV29-1*01	TRBJ2-1*01
CASSVTGTDTQYF	TRBV9*01	TRBJ2-3*01
CSARDSSGSSDTQYF	TRBV20-1*01	TRBJ2-3*01
CASSLDGYEQYF	TRBV7-9*01	TRBJ2-7*01
CSVYSSGANVLTF	TRBV29-1*01	TRBJ2-6*01
CASSYEGGATDTQYF	TRBV6-1*01	TRBJ2-3*01
CASSPLGGGAKETQYF	TRBV7-2*01	TRBJ2-5*01
CASSLAQLSYEQYF	TRBV7-8*01	TRBJ2-7*01
CASSEIPGPYNEQFF	TRBV2*01	TRBJ2-1*01
CASSYSRLGQGTRNTEAFF	TRBV6-9*01	TRBJ1-1*01
CSVKQETNYGYTF	TRBV29-1*01	TRBJ1-2*01
CASSQDPSSYEQYF	TRBV4-1*01	TRBJ2-7*01
CASSRTGGTNQPQHF	TRBV5-6*01	TRBJ1-5*01
CSVNPVDRPTEAFF	TRBV29-1*01	TRBJ1-1*01
CASLGGTKFTDTQYF	TRBV5-5*01	TRBJ2-3*01
CASSNRDRGNEQFF	TRBV6-6*01	TRBJ2-1*01
CASSPQGAVYGYTF	TRBV12-4*01	TRBJ1-2*01
CASSGTGRGEKLFF	TRBV9*01	TRBJ1-4*01
CASSVDGGENQPQHF	TRBV9*01	TRBJ1-5*01
CASRETGSPQETQYF	TRBV2*01	TRBJ2-5*01
CASSLTDTEAFF	TRBV5-1*01	TRBJ1-1*01
CASSFLGGADGYTF	TRBV27*01	TRBJ1-2*01
CASSYVGGTDTQYF	TRBV6-5*01	TRBJ2-3*01
CASSEAGTGGTYGYTF	TRBV2*01	TRBJ1-2*01
CATSDASTENIQYF	TRBV24-1*01	TRBJ2-4*01
CASSEAGAGGLTDTQYF	TRBV2*01	TRBJ2-3*01
CSVVPGTEAFF	TRBV29-1*01	TRBJ1-1*01
CASSDRGRAYNEQFF	TRBV4-3*01	TRBJ2-1*01
CASSYSRGGGYEQYF	TRBV6-6*01	TRBJ2-7*01
CASSPGLANNEQFF	TRBV7-2*01	TRBJ2-1*01
CASSTGTTLTDTQYF	TRBV7-8*01	TRBJ2-3*01
CASSSYPLAGGYEQFF	TRBV12-4*01	TRBJ2-1*01
CASSRTGSGGYTF	TRBV4-3*01	TRBJ1-2*01
CASAGLAPPEQYF	TRBV6-1*01	TRBJ2-7*01
CASLRGQGALDTQYF	TRBV5-1*01	TRBJ2-3*01
CASSQVPPPGRDGYTF	TRBV4-1*01	TRBJ1-2*01
CASSPFNRGETQYF	TRBV6-5*01	TRBJ2-5*01
CASSSQAGELFF	TRBV7-6*01	TRBJ2-2*01
CSVQGLPLNTDTQYF	TRBV29-1*01	TRBJ2-3*01
CASSLITGPNTEAFF	TRBV6-6*01	TRBJ1-1*01
CASSGGTGGDGYTF	TRBV7-6*01	TRBJ1-2*01
CASSQVGTGTEAFF	TRBV4-1*01	TRBJ1-1*01
CASRSRNSPLHF	TRBV27*01	TRBJ1-6*01
CASSPGQGSREQYF	TRBV18*01	TRBJ2-7*01
CSVEGGAPMDTQYF	TRBV29-1*01	TRBJ2-3*01
CARGDRKPTKGPVNEQFF	TRBV3-1*01	TRBJ2-1*01
CASSLDNNPRHNAPLHF	TRBV7-2*01	TRBJ1-6*01
CASSFTGTGSYEQYF	TRBV27*01	TRBJ2-7*01
CASQPPGEHQPQHF	TRBV6-1*01	TRBJ1-5*01
CTCRDRGRTGANVLTF	TRBV29-1*01	TRBJ2-6*01
CASSFSPTGRYNEQFF	TRBV28*01	TRBJ2-1*01
CASSSGSGVYQETQYF	TRBV7-9*01	TRBJ2-5*01
CASHSGNYEQYF	TRBV18*01	TRBJ2-7*01
CSVVRGNTNYGYTF	TRBV29-1*01	TRBJ1-2*01
CASTYSGSGANVLTF	TRBV9*01	TRBJ2-6*01
CSVRLRNEQFF	TRBV29-1*01	TRBJ2-1*01
CASSLVAGTGANVLTF	TRBV7-6*01	TRBJ2-6*01
CASSQVGQGSEQFF	TRBV4-1*01	TRBJ2-1*01
CSVEDREVRYF	TRBV29-1*01	TRBJ2-7*01
CASSQVGAGNEQFF	TRBV4-1*01	TRBJ2-1*01
CASSYSGGVGTDTQYF	TRBV6-5*01	TRBJ2-3*01
CSARVGGWGGINEQFF	TRBV20-1*01	TRBJ2-1*01
CASSYTAGSYEQYF	TRBV6-5*01	TRBJ2-7*01
CASSLEVSNTEAFF	TRBV7-2*01	TRBJ1-1*01
CASSRTGIRNTIYF	TRBV5-6*01	TRBJ1-3*01
CASSSGTSVYQETQYF	TRBV7-9*01	TRBJ2-5*01
CASSSLMGLSMDGRYNSPLHF	TRBV27*01	TRBJ1-6*01
CSAQQGNSYEQYF	TRBV20-1*01	TRBJ2-7*01
CASTPRAGREQYF	TRBV25-1*01	TRBJ2-7*01
CASSQDGRTVYNEQFF	TRBV4-1*01	TRBJ2-1*01
CSARDRGAGANVLTF	TRBV20-1*01	TRBJ2-6*01
CASSLPQGVPPPLHF	TRBV7-2*01	TRBJ1-6*01
CSVQVRDRSLRLKTEAFF	TRBV29-1*01	TRBJ1-1*01
CASSDTAGPSTDTQYF	TRBV2*01	TRBJ2-3*01
CSARDTYYGYTF	TRBV20-1*01	TRBJ1-2*01
CASSQDRATNYGYTF	TRBV4-3*01	TRBJ1-2*01
CASRRGDSPLHF	TRBV27*01	TRBJ1-6*01
CASNVKGLAGGPGISGELFF	TRBV2*01	TRBJ2-2*01
CASSPGYGYTF	TRBV27*01	TRBJ1-2*01
CASTLWGGTEAFF	TRBV6-1*01	TRBJ1-1*01
CASSLTGPKDTF	TRBV11-2*01	TRBJ1-2*01
CASSPSPGLNSPLHF	TRBV4-1*01	TRBJ1-6*01
CASSFWVLAKNIQYF	TRBV5-6*01	TRBJ2-4*01
CASSLPGLAVETQYF	TRBV6-1*01	TRBJ2-5*01
CASSLAWGLPTDTQYF	TRBV27*01	TRBJ2-3*01
CASSFLGGETFF	TRBV12-4*01	TRBJ1-1*01
CASSQVPGGQYNEQFF	TRBV4-2*01	TRBJ2-1*01
CASRHRDTPEVEQFF	TRBV7-9*01	TRBJ2-1*01
CASSIMVLGGSEAFF	TRBV19*01	TRBJ1-1*01
CGAWTGYGYTF	TRBV20-1*01	TRBJ1-2*01
CASSLLRPSGGAGDTQYF	TRBV27*01	TRBJ2-3*01
CASSQEGYTEAFF	TRBV4-2*01	TRBJ1-1*01
CAISETGLSNQPQHF	TRBV10-3*01	TRBJ1-5*01
CAWSVNRGETQYF	TRBV30*01	TRBJ2-5*01
CSATSGIGNTGELFF	TRBV29-1*01	TRBJ2-2*01
CASSAAPQYDLVEQYF	TRBV9*01	TRBJ2-7*01
CASSPGLGIVLTF	TRBV4-2*01	TRBJ2-6*01
CASSLLQSSGELFF	TRBV5-6*01	TRBJ2-2*01
CASGRGQSSTDTQYF	TRBV2*01	TRBJ2-3*01
CASSYSQWGKISYNEQFF	TRBV6-9*01	TRBJ2-1*01
CASSFRDSSREQFF	TRBV28*01	TRBJ2-1*01
CASTWGGVYEQYF	TRBV28*01	TRBJ2-7*01
CASSLGLGIARYEQYF	TRBV5-1*01	TRBJ2-7*01
CSERGPYSYEQYF	TRBV20-1*01	TRBJ2-7*01
CASSQGGRRNEKLFF	TRBV4-2*01	TRBJ1-4*01
CASSPGSGGTNTGELFF	TRBV18*01	TRBJ2-2*01
CASSQVDRGYNSPLHF	TRBV12-4*01	TRBJ1-6*01
CASSRRDRGQTTGANVLTF	TRBV6-9*01	TRBJ2-6*01
CASSLRGARGYGYTF	TRBV27*01	TRBJ1-2*01
CASSLGPSGQETQYF	TRBV7-9*01	TRBJ2-5*01
CASSESPGTLYF	TRBV10-1*01	TRBJ2-7*01
CSAQDTTEAFF	TRBV20-1*01	TRBJ1-1*01
CASSTPTGFGETQYF	TRBV18*01	TRBJ2-5*01
CASSRDPSSGNTIYF	TRBV3-1*01	TRBJ1-3*01
CATSDPGSTGELFF	TRBV24-1*01	TRBJ2-2*01
CSAIQVDGELFF	TRBV20-1*01	TRBJ2-2*01
CASSLGAGAAYNEQFF	TRBV28*01	TRBJ2-1*01
CASIRPATYEQYF	TRBV6-5*01	TRBJ2-7*01
CASSRSGTSGGPDTQYF	TRBV13*01	TRBJ2-3*01
CASSPRTGYGYTF	TRBV27*01	TRBJ1-2*01
CATSLQGWGTEAFF	TRBV2*01	TRBJ1-1*01
CASSLGVNTEAFF	TRBV11-2*01	TRBJ1-1*01
CASRPRTGTGELFF	TRBV28*01	TRBJ2-2*01
CATSDFAAKGQFF	TRBV24-1*01	TRBJ2-1*01
CASRAGTGTYEQYF	TRBV7-8*01	TRBJ2-7*01
CASSLFGLAGGPGANVLTF	TRBV6-9*01	TRBJ2-6*01
CASSAWGEAFF	TRBV4-1*01	TRBJ1-1*01
CSVEYSKEAFF	TRBV29-1*01	TRBJ1-1*01
CASSLTHPTGQGNTEAFF	TRBV7-9*01	TRBJ1-1*01
CASSLAPGQPQHF	TRBV27*01	TRBJ1-5*01
CASSEAGGSYEQYF	TRBV2*01	TRBJ2-7*01
CASSEGPKLFF	TRBV2*01	TRBJ1-4*01
CASTADFGKNIQYF	TRBV7-2*01	TRBJ2-4*01
CASSIRTAGELFF	TRBV6-1*01	TRBJ2-2*01
CASSSSRDLHEQYF	TRBV5-4*01	TRBJ2-7*01
CASSLSSDTEAFF	TRBV28*01	TRBJ1-1*01
CASSQDGANVLTF	TRBV4-3*01	TRBJ2-6*01
CASSGVATEAFF	TRBV28*01	TRBJ1-1*01
CASSMEGYNEQFF	TRBV19*01	TRBJ2-1*01
CASSQDLAAGQGAGGANVLTF	TRBV4-3*01	TRBJ2-6*01
CASSSPDRALTGELFF	TRBV6-5*01	TRBJ2-2*01
CASSSTGGLNEKLFF	TRBV12-4*01	TRBJ1-4*01
CASISWTGGLAEAFF	TRBV27*01	TRBJ1-1*01
CASSFGTGGGQPQHF	TRBV5-6*01	TRBJ1-5*01
CASSLDTAGGAYNEQFF	TRBV4-1*01	TRBJ2-1*01
CASSQEAEDTQYF	TRBV4-2*01	TRBJ2-3*01
CSARPGGGTPGANVLTF	TRBV20-1*01	TRBJ2-6*01
CSALIQGASYEQYF	TRBV20-1*01	TRBJ2-7*01
CASSVGGGSSGANVLTF	TRBV9*01	TRBJ2-6*01
CASNSAERFFTNTGELFF	TRBV6-6*01	TRBJ2-2*01
CASRTGAGANVLTF	TRBV27*01	TRBJ2-6*01
CASSLGAGGGNNEQFF	TRBV27*01	TRBJ2-1*01
CATTSGLVAFF	TRBV10-2*01	TRBJ1-1*01
CASRDNKETQYF	TRBV2*01	TRBJ2-5*01
CASSFRWAPNGYTF	TRBV12-4*01	TRBJ1-2*01
CASRRGGNEQFF	TRBV4-2*01	TRBJ2-1*01
CASSQLTGTDTQYF	TRBV4-3*01	TRBJ2-3*01
CASSSRYASPDNEQFF	TRBV11-2*01	TRBJ2-1*01
CSVEYSTDTQYF	TRBV29-1*01	TRBJ2-3*01
CASTHRVPGANVLTF	TRBV25-1*01	TRBJ2-6*01
CASSFSPEGQPQHF	TRBV7-2*01	TRBJ1-5*01
CASSLTGPVANVLTF	TRBV6-1*01	TRBJ2-6*01
CASSLIGAGEQFF	TRBV27*01	TRBJ2-1*01
CASSLVPGEATGELFF	TRBV7-9*01	TRBJ2-2*01
CASRLTENQPQHF	TRBV28*01	TRBJ1-5*01
CASSVGQGVDTEAFF	TRBV2*01	TRBJ1-1*01
CASSQAPNVYEQYF	TRBV4-1*01	TRBJ2-7*01
CASSQNRVPYGNTIYF	TRBV6-5*01	TRBJ1-3*01
CASGLHQPQHF	TRBV27*01	TRBJ1-5*01
CASSSPGWPGGTEAFF	TRBV28*01	TRBJ1-1*01
CASSQESSIGELFF	TRBV4-3*01	TRBJ2-2*01
CASRLTSGGSETQYF	TRBV6-5*01	TRBJ2-5*01
CASSYPRQGPNTGELFF	TRBV7-6*01	TRBJ2-2*01
CASSELNTQYF	TRBV12-4*01	TRBJ2-3*01
CASSAGRGNTEAFF	TRBV6-4*01	TRBJ1-1*01
CASSSRFGYEQYF	TRBV7-3*01	TRBJ2-7*01
CASSPLLTMNTEAFF	TRBV4-1*01	TRBJ1-1*01
CASSSPSRDPYGYTF	TRBV6-5*01	TRBJ1-2*01
CASRDSRGQPQHF	TRBV10-2*01	TRBJ1-5*01
CSVGGQGSSPLHF	TRBV29-1*01	TRBJ1-6*01
CASSLGTELNEKLFF	TRBV5-8*01	TRBJ1-4*01
CASSVESYPGELFF	TRBV9*01	TRBJ2-2*01
CASSLEPTLAGAEDTQYF	TRBV12-4*01	TRBJ2-3*01
CASSWDADRQFF	TRBV11-2*01	TRBJ2-2*01
CASSLGGVETQYF	TRBV5-6*01	TRBJ2-5*01
CASSLALGGSAYNEQFF	TRBV7-7*01	TRBJ2-1*01
CASSLGPTGTDTQYF	TRBV4-1*01	TRBJ2-3*01
CSAEDRAGGYTF	TRBV20-1*01	TRBJ1-2*01
CASSDGLYQETQYF	TRBV27*01	TRBJ2-5*01
CASSLTPGKAYEQYF	TRBV4-1*01	TRBJ2-7*01
CSVEESGTGSPQHF	TRBV29-1*01	TRBJ1-5*01
CSVEDPWRDQETQYF	TRBV29-1*01	TRBJ2-5*01
CASSPRNGRPAADTQYF	TRBV4-1*01	TRBJ2-3*01
CASSISGSAQETQYF	TRBV7-6*01	TRBJ2-5*01
CASSQDAGFAGELFF	TRBV4-1*01	TRBJ2-2*01
CASTGSDRGTGELFF	TRBV27*01	TRBJ2-2*01
CAWSVERGTEAFF	TRBV30*01	TRBJ1-1*01
CASSPQVFGNTIYF	TRBV4-3*01	TRBJ1-3*01
CASSQAGREQFF	TRBV4-3*01	TRBJ2-1*01
CSARALGGSEAFF	TRBV20-1*01	TRBJ1-1*01
CAIEADTGELFF	TRBV10-3*01	TRBJ2-2*01
CASSLSRTSGGAFTDTQYF	TRBV12-4*01	TRBJ2-3*01
CASSQGSGVNIQYF	TRBV4-1*01	TRBJ2-4*01
CASGRQNTEAFF	TRBV12-4*01	TRBJ1-1*01
CASSSLVPKSTDTQYF	TRBV10-2*01	TRBJ2-3*01
CASHRVRNTEAFF	TRBV6-5*01	TRBJ1-1*01
CSASLAGSSTDTQYF	TRBV20-1*01	TRBJ2-3*01
CASKGLNTGELFF	TRBV9*01	TRBJ2-2*01
CASSQGSGKAYNEQFF	TRBV3-1*01	TRBJ2-1*01
CASSEGLAHEQYF	TRBV7-3*01	TRBJ2-7*01
CASGLGYTEAFF	TRBV12-5*01	TRBJ1-1*01
CASSLGAAYEQYF	TRBV12-4*01	TRBJ2-7*01
CASSPDREPQYF	TRBV27*01	TRBJ2-3*01
CASSLARQIYGYTF	TRBV12-4*01	TRBJ1-2*01
CASSLVGEPSYEQYF	TRBV5-1*01	TRBJ2-7*01
CASSPKQGGGNTEAFF	TRBV18*01	TRBJ1-1*01
CASSVLAGGHTGELFF	TRBV7-8*01	TRBJ2-2*01
CASSSWTGPEQFF	TRBV7-2*01	TRBJ2-1*01
CASSEGIIEQFF	TRBV25-1*01	TRBJ2-1*01
CASSFRPGPRLEGELFF	TRBV11-2*01	TRBJ2-2*01
CASSLDVSLYF	TRBV7-9*01	TRBJ2-5*01
CASSPSTGFVNQPQHF	TRBV7-8*01	TRBJ1-5*01
CASSVGTGYEQYF	TRBV6-6*01	TRBJ2-7*01
CSASGVRRVSNQPQHF	TRBV20-1*01	TRBJ1-5*01
CASSPGRGHEQYF	TRBV5-4*01	TRBJ2-7*01
CASSLGTSYEQYF	TRBV12-4*01	TRBJ2-7*01
CASSPPIPAYDEQFF	TRBV5-1*01	TRBJ2-1*01
CATSRRGRGTGELFF	TRBV15*01	TRBJ2-2*01
CASSQVQGEMETQYF	TRBV4-3*01	TRBJ2-5*01
CASSLGGTVGQPQHF	TRBV12-4*01	TRBJ1-5*01
CAWNGPPRDNEQFF	TRBV30*01	TRBJ2-1*01
CASSHTLWPGTIQETQYF	TRBV4-2*01	TRBJ2-5*01
CASSLSGEQYF	TRBV27*01	TRBJ2-7*01
CASSQEDRTTEAFF	TRBV3-1*01	TRBJ1-1*01
CASGTTPGQPQHF	TRBV12-5*01	TRBJ1-5*01
CASSQETDSIYGYTF	TRBV4-3*01	TRBJ1-2*01
CASSEFRFTDTQYF	TRBV2*01	TRBJ2-3*01
CASSNAVSGPYQETQYF	TRBV11-2*01	TRBJ2-5*01
CAIKPDSQPYEQYF	TRBV10-3*01	TRBJ2-7*01
CASSQVGNEQFF	TRBV4-1*01	TRBJ2-1*01
CASSQETGTGVAVQYF	TRBV4-2*01	TRBJ2-7*01
CASSSGPSGAEKLFF	TRBV7-9*01	TRBJ1-4*01
CSARDRVGLAGGQGGNEQFF	TRBV20-1*01	TRBJ2-1*01
CASSLVWGETQYF	TRBV5-1*01	TRBJ2-5*01
CASSPYQGADEQYF	TRBV11-1*01	TRBJ2-7*01
CASSQDRDGQSNYGYTF	TRBV4-3*01	TRBJ1-2*01
CASKDGPTGNTIYF	TRBV12-4*01	TRBJ1-3*01
CASSQGSEQYF	TRBV7-6*01	TRBJ2-7*01
CASSPSRQKADTQYF	TRBV7-9*01	TRBJ2-3*01
CASSYSWGLSGNTIYF	TRBV6-5*01	TRBJ1-3*01
CASRPGQDPYGYTF	TRBV6-5*01	TRBJ1-2*01
CASSQIGSGDGNTIYF	TRBV4-1*01	TRBJ1-3*01
CASSLGGAYNEQFF	TRBV27*01	TRBJ2-1*01
CASSKTWGAQYF	TRBV28*01	TRBJ2-3*01
CASKQGTGELFF	TRBV12-4*01	TRBJ2-2*01
CASTNFDGPNYGYTF	TRBV6-6*01	TRBJ1-2*01
CATPNTGTGGNNEQFF	TRBV2*01	TRBJ2-1*01
CASSSPQGREEQYF	TRBV5-5*01	TRBJ2-7*01
CSARDLTSGAYEQYF	TRBV20-1*01	TRBJ2-7*01
CASSSVPGLAVSYEQYF	TRBV2*01	TRBJ2-7*01
CASSSQETQYF	TRBV27*01	TRBJ2-5*01
CASSETAGEQYF	TRBV7-3*01	TRBJ2-7*01
CASSSPLGGSPYEQYF	TRBV7-8*01	TRBJ2-7*01
CSARGGYEAFF	TRBV20-1*01	TRBJ1-1*01
CASSLGSASGYTF	TRBV4-1*01	TRBJ1-2*01
CASSRGQGTDTQYF	TRBV4-1*01	TRBJ2-3*01
CASSQAFTEAFF	TRBV4-2*01	TRBJ1-1*01
CASSLERGAPIDTQYF	TRBV7-9*01	TRBJ2-3*01
CASSYGYTSGGAKETQYF	TRBV6-9*01	TRBJ2-5*01
CASSLKGFGNQPQHF	TRBV27*01	TRBJ1-5*01
CASSQDTPTDTQYF	TRBV4-1*01	TRBJ2-3*01
CASSFRDRGFDGELFF	TRBV9*01	TRBJ2-2*01
CASSLTHRTDSTEAFF	TRBV7-8*01	TRBJ1-1*01
CASSWTGGSGNTIYF	TRBV5-5*01	TRBJ1-3*01
CASRVNTDTQYF	TRBV2*01	TRBJ2-3*01
CASSPRAAGYTDTQYF	TRBV11-2*01	TRBJ2-3*01
CASNPGLQETQYF	TRBV6-1*01	TRBJ2-5*01
CASSRTGANGKWEQFF	TRBV12-4*01	TRBJ2-1*01
CASRHTGDSEQYF	TRBV11-2*01	TRBJ2-7*01
CASSTQGQHQPQHF	TRBV12-4*01	TRBJ1-5*01
CSVVSGGPNSDTQYF	TRBV29-1*01	TRBJ2-3*01
CASSESTGHEAEAFF	TRBV12-4*01	TRBJ1-1*01
CASSVLALRELFF	TRBV6-5*01	TRBJ2-2*01
CAISEPAGTSSSNYGYTF	TRBV10-3*01	TRBJ1-2*01
CASSEERFGGPQHF	TRBV2*01	TRBJ1-5*01
CASSYTPSGENTEAFF	TRBV6-6*01	TRBJ1-1*01
CASSQDGTGFQPQHF	TRBV4-2*01	TRBJ1-5*01
CASSPGTGGADTQYF	TRBV18*01	TRBJ2-3*01
CAGSMEGSSSYEQYF	TRBV6-5*01	TRBJ2-7*01
CASSQGDYEQYF	TRBV3-1*01	TRBJ2-7*01
CASSRRETDTQYF	TRBV18*01	TRBJ2-3*01
CASSLIGQGFHEQYF	TRBV13*01	TRBJ2-7*01
CASRQNSPLHF	TRBV28*01	TRBJ1-6*01
CASSQEKTGELFF	TRBV4-1*01	TRBJ2-2*01
CASSLVGGATDTQYF	TRBV11-2*01	TRBJ2-3*01
CASSLWPNEQFF	TRBV27*01	TRBJ2-1*01
CASSLATANTEAFF	TRBV5-1*01	TRBJ1-1*01
CASSPWGGTPTDTQYF	TRBV9*01	TRBJ2-3*01
CASSSPTGINEQFF	TRBV7-9*01	TRBJ2-1*01
CASSSSLGTDTQYF	TRBV6-1*01	TRBJ2-3*01
CASSLTATYEQYF	TRBV3-1*01	TRBJ2-7*01
CASSPPRASGSSIEQFF	TRBV6-1*01	TRBJ2-1*01
CASSKLAGSQETQYF	TRBV12-4*01	TRBJ2-5*01
CASSPEPTLSYEQYF	TRBV9*01	TRBJ2-7*01
CASSSTDADTQYF	TRBV7-2*01	TRBJ2-3*01
CASSFLEGTSGDEQFF	TRBV7-8*01	TRBJ2-1*01
CASSSNIHGQGEYGYTF	TRBV27*01	TRBJ1-2*01
CSVETATGANVLTF	TRBV29-1*01	TRBJ2-6*01
CASSLGTSGRLDTQYF	TRBV7-2*01	TRBJ2-3*01
CASSSGLVGTQPYPYNEQFF	TRBV7-9*01	TRBJ2-1*01
CATVLDSSYNSPLHF	TRBV24-1*01	TRBJ1-6*01
CASSLVRSSYEQYF	TRBV5-8*01	TRBJ2-7*01
CASSLQGWSGEQFF	TRBV7-6*01	TRBJ2-1*01
CASSWGTEAFF	TRBV28*01	TRBJ1-1*01
CASSLGTGLTEAFF	TRBV7-9*01	TRBJ1-1*01
CASSQDVANEKLFF	TRBV4-1*01	TRBJ1-4*01
CASSGTGAVNTGELFF	TRBV6-1*01	TRBJ2-2*01
CSLAQFF	TRBV20-1*01	TRBJ2-1*01
CASSLMGLDRTEQFF	TRBV28*01	TRBJ2-1*01
CASTLLDRVGGYTF	TRBV9*01	TRBJ1-2*01
CASRSPLAEKETQYF	TRBV7-2*01	TRBJ2-5*01
CASSFSGAGVENEQFF	TRBV5-1*01	TRBJ2-1*01
CSAREVGAGDTGELFF	TRBV20-1*01	TRBJ2-2*01
CAISGRDSPPSYNEQFF	TRBV10-3*01	TRBJ2-1*01
CASSFAGGQQDTQYF	TRBV12-4*01	TRBJ2-3*01
CASSQVGSGSTEAFF	TRBV7-9*01	TRBJ1-1*01
CASSGGGPETQYF	TRBV28*01	TRBJ2-5*01
CASSPSGGFTDTQYF	TRBV7-2*01	TRBJ2-3*01
CASSKTSGQFF	TRBV6-1*01	TRBJ2-1*01
CSAKGGGVNNEQFF	TRBV20-1*01	TRBJ2-1*01
CASSPSGNTIYF	TRBV7-2*01	TRBJ1-3*01
CSARNPGPRGSYEQYF	TRBV29-1*01	TRBJ2-7*01
CASSYTFTGAQETQYF	TRBV6-5*01	TRBJ2-5*01
CASSFPVLLIITYNSPLHF	TRBV7-6*01	TRBJ1-6*01
CASSTSDAGPGANVLTF	TRBV27*01	TRBJ2-6*01
CASSPLTGDTEAFF	TRBV2*01	TRBJ1-1*01
CASLSPRETQYF	TRBV28*01	TRBJ2-5*01
CATSDRHSYEQYF	TRBV24-1*01	TRBJ2-7*01
CASSQDRYSNQPQHF	TRBV6-5*01	TRBJ1-5*01
CASSPTGGGVDTQYF	TRBV6-5*01	TRBJ2-3*01
CSARGGRRGTSYNEQFF	TRBV20-1*01	TRBJ2-1*01
CSARASGGLSNQPQHF	TRBV20-1*01	TRBJ1-5*01
CASSLAPVGHGNIQYF	TRBV5-1*01	TRBJ2-4*01
CASPGLAVSAGELFF	TRBV12-4*01	TRBJ2-2*01
CASSYDRSSSYEQYF	TRBV6-5*01	TRBJ2-7*01
CASSSRRNTEAFF	TRBV6-1*01	TRBJ1-1*01
CASISSGGLPDTQYF	TRBV6-1*01	TRBJ2-3*01
CASTGQFQPQHF	TRBV6-1*01	TRBJ1-5*01
CSTVAGAKNIQYF	TRBV29-1*01	TRBJ2-4*01
CASSLGRQGAEQPQHF	TRBV5-6*01	TRBJ1-5*01
CASRPGDYDYYEQYF	TRBV12-4*01	TRBJ2-7*01
CASRSGDTQYF	TRBV27*01	TRBJ2-3*01
CASSLTSGGYEQYF	TRBV12-4*01	TRBJ2-7*01
CASSKTGSNTGELFF	TRBV27*01	TRBJ2-2*01
CSAYPRDVILGELFF	TRBV20-1*01	TRBJ2-2*01
CSVAPISCHIQYF	TRBV29-1*01	TRBJ2-4*01
CASSPIGVSGNTIYF	TRBV6-5*01	TRBJ1-3*01
CASARGLIDGYTF	TRBV6-1*01	TRBJ1-2*01
CASWGQVNSPLHF	TRBV6-5*01	TRBJ1-6*01
CASSQDPGGTGGPTNEKLFF	TRBV4-2*01	TRBJ1-4*01
CASSLLVGGERLFF	TRBV7-2*01	TRBJ2-1*01
CASSQDGTGVYGYTF	TRBV4-1*01	TRBJ1-2*01
CASSLVGGYYEQYF	TRBV5-1*01	TRBJ2-7*01
CAWEAGHVGYTF	TRBV30*01	TRBJ1-2*01
CASIGTRGEVWQPQHF	TRBV6-1*01	TRBJ1-5*01
CASSQPAQNEKLFF	TRBV4-1*01	TRBJ1-4*01
CASSFRGRNEQYF	TRBV5-4*01	TRBJ2-7*01
CASSQAPRPETQYF	TRBV4-1*01	TRBJ2-5*01
CSVSRGTDSPLHF	TRBV29-1*01	TRBJ1-6*01
CASRSGAGGNTIYF	TRBV2*01	TRBJ1-3*01
CASISRGQSTGELFF	TRBV6-1*01	TRBJ2-2*01
CASIGTSGGNEQFF	TRBV27*01	TRBJ2-1*01
CASSLVHTEAFF	TRBV12-4*01	TRBJ1-1*01
CASSQVSRGGSYEQYF	TRBV4-2*01	TRBJ2-7*01
CSVDWGQNTEAFF	TRBV29-1*01	TRBJ1-1*01
CASSPEGDRAHPFF	TRBV7-9*01	TRBJ1-1*01
CSVVDHTDTQYF	TRBV29-1*01	TRBJ2-3*01
CASSGVKGAKPQNQPQHF	TRBV25-1*01	TRBJ1-5*01
CASSQGWGPGDTQYF	TRBV4-3*01	TRBJ2-3*01
CASSRTQGMNTEAFF	TRBV6-6*01	TRBJ1-1*01
CASSYDTRGNEQFF	TRBV6-1*01	TRBJ2-1*01
CASSPAQGGYEQYF	TRBV7-7*01	TRBJ2-7*01
CASCPGGNEKLFF	TRBV2*01	TRBJ1-4*01
CASSDSIGTSGYPDTQYF	TRBV7-6*01	TRBJ2-3*01
CASSQESRANVLTF	TRBV4-1*01	TRBJ2-6*01
CASSQVVVKGKDTIYF	TRBV4-1*01	TRBJ1-3*01
CASSQGPYTEAFF	TRBV4-1*01	TRBJ1-1*01
CSVGRLPENTQYF	TRBV29-1*01	TRBJ2-3*01
CSVDAPPKNTEAFF	TRBV29-1*01	TRBJ1-1*01
CASSVEGQGFHEQYF	TRBV7-2*01	TRBJ2-7*01
CASTLSGGPVLRFF	TRBV3-1*01	TRBJ2-1*01
CASSFPRVGYGYTF	TRBV7-9*01	TRBJ1-2*01
CSVSGLAVPTDTQYF	TRBV29-1*01	TRBJ2-3*01
CASSQVPSGGEELFF	TRBV4-1*01	TRBJ2-2*01
CSAPGRGGPQETQYF	TRBV20-1*01	TRBJ2-5*01
CASSGQGVTGELFF	TRBV28*01	TRBJ2-2*01
CSPEGGRLYEQYF	TRBV20-1*01	TRBJ2-7*01
CASSSGQTPYEQYF	TRBV5-1*01	TRBJ2-7*01
CASWTSGGNEQFF	TRBV6-6*01	TRBJ2-1*01
CASRRGRDEKLFF	TRBV10-2*01	TRBJ1-4*01
CASSQAAGGTYNEQFF	TRBV4-3*01	TRBJ2-1*01
CASSYTKTGTGDGYTF	TRBV6-6*01	TRBJ1-2*01
CASIPRGDGTEAFF	TRBV28*01	TRBJ1-1*01
CASSAWSSGANVLTF	TRBV12-4*01	TRBJ2-6*01
CASSPQGPQETQYF	TRBV18*01	TRBJ2-5*01
CASSALIPPLGPNTGELFF	TRBV5-6*01	TRBJ2-2*01
CASSRGEAGPSGANVLTF	TRBV4-2*01	TRBJ2-6*01
CASSLAGQGANTEAFF	TRBV28*01	TRBJ1-1*01
CSVRRDRAYEQYF	TRBV29-1*01	TRBJ2-7*01
CSAPPGPERDTQYF	TRBV20-1*01	TRBJ2-3*01
CASTQANYGYTF	TRBV6-1*01	TRBJ1-2*01
CASSLEGRAASYEQYF	TRBV7-6*01	TRBJ2-7*01
CASGLVVGQGSFF	TRBV12-5*01	TRBJ1-1*01
CSVEVVGTSGRYEQFF	TRBV29-1*01	TRBJ2-1*01
CASSPPRDGTANQPQHF	TRBV7-8*01	TRBJ1-5*01
CASVRNSPLHF	TRBV2*01	TRBJ1-6*01
CASRREEDQPQHF	TRBV12-4*01	TRBJ1-5*01
CSAPSPRKTEAFF	TRBV20-1*01	TRBJ1-1*01
CAYQRGYEQYF	TRBV30*01	TRBJ2-7*01
CASSEWAFFDEQFF	TRBV4-1*01	TRBJ2-1*01
CASSLATTMNQPQHF	TRBV7-8*01	TRBJ1-5*01
CSVEGRPTHHGYTF	TRBV29-1*01	TRBJ1-2*01
CATSRHGTSGLNTGELFF	TRBV15*01	TRBJ2-2*01
CASSLAGGSGISNEQFF	TRBV7-9*01	TRBJ2-1*01
CASSYDRSLTYEQYF	TRBV6-5*01	TRBJ2-7*01
CASSLSPVQYF	TRBV5-8*01	TRBJ2-4*01
CASSFNYEQYF	TRBV7-9*01	TRBJ2-7*01
CAGGGTGSEKLFF	TRBV2*01	TRBJ1-4*01
CASSSSTGELFF	TRBV6-6*01	TRBJ2-2*01
CASSGGGTDTQYF	TRBV27*01	TRBJ2-3*01
CASSPGLAEPSTDTQYF	TRBV7-6*01	TRBJ2-3*01
CASSSGGFQLAKNIQYF	TRBV18*01	TRBJ2-4*01
CASSATGGDDQPQHF	TRBV6-1*01	TRBJ1-5*01
CASRDSLAKNIQYF	TRBV12-4*01	TRBJ2-4*01
CASSSQGNSPLHF	TRBV7-3*01	TRBJ1-6*01
CASSSKADTQYF	TRBV7-8*01	TRBJ2-3*01
CASLTGGDTQYF	TRBV28*01	TRBJ2-3*01
CASSAVEGSSYEQYF	TRBV4-2*01	TRBJ2-7*01
CASSLVWGDTQYF	TRBV11-3*01	TRBJ2-3*01
CASSSAGTGNQPQHF	TRBV28*01	TRBJ1-5*01
CASSFGTGELFF	TRBV2*01	TRBJ2-2*01
CAISSGGDANTGELFF	TRBV10-3*01	TRBJ2-2*01
CASSLVSPEAFF	TRBV11-2*01	TRBJ1-1*01
CASSATGDQPQHF	TRBV25-1*01	TRBJ1-5*01
CASSLLGGTNTGELFF	TRBV28*01	TRBJ2-2*01
CASGPPGSSYNEQFF	TRBV12-5*01	TRBJ2-1*01
CASSLPRPTISGGGLDEQFF	TRBV11-2*01	TRBJ2-1*01
CASSLGLKTQYF	TRBV7-2*01	TRBJ2-5*01
CAWSVQFWGSPLSGNTIYF	TRBV30*01	TRBJ1-3*01
CSDRELGGNTIYF	TRBV29-1*01	TRBJ1-3*01
CASSYNLGGTHNEQFF	TRBV6-1*01	TRBJ2-1*01
CASSPRLAGGLQETQYF	TRBV13*01	TRBJ2-5*01
CASSLVPYGGQPQHF	TRBV7-2*01	TRBJ1-5*01
CASSSSGASSYEQYF	TRBV9*01	TRBJ2-7*01
CASRGPGQANTGELFF	TRBV28*01	TRBJ2-2*01
CASSYRGHTREDTQYF	TRBV12-4*01	TRBJ2-3*01
CASSPGALANTEAFF	TRBV5-5*01	TRBJ1-1*01
CASSLPWGDETQYF	TRBV7-9*01	TRBJ2-5*01
CASSPIRGGTLSEKLFF	TRBV7-3*01	TRBJ1-4*01
CASTLLAGSTDTQYF	TRBV12-4*01	TRBJ2-3*01
CASSQVLQGAFEQYF	TRBV4-1*01	TRBJ2-7*01
CASSQARTGQETQYF	TRBV4-1*01	TRBJ2-5*01
CSARGTGAYEQYF	TRBV20-1*01	TRBJ2-7*01
CSARDRLNTEAFF	TRBV20-1*01	TRBJ1-1*01
CASSLYTGGPDETQYF	TRBV7-9*01	TRBJ2-5*01
CASSAWSSYNSPLHF	TRBV7-2*01	TRBJ1-6*01
CASSYVGRLNEQYF	TRBV6-1*01	TRBJ2-7*01
CASSQDRGPNTEAFF	TRBV4-1*01	TRBJ1-1*01
CASSDSGGRTDTQYF	TRBV9*01	TRBJ2-3*01
CASSYSTGSTGELFF	TRBV6-5*01	TRBJ2-2*01
CASSQRNLGEKLFF	TRBV4-1*01	TRBJ1-4*01
CASSAGTRGYEQFF	TRBV11-2*01	TRBJ2-1*01
CASSPYRQGGNSPLHF	TRBV13*01	TRBJ1-6*01
CSVLTGVHNEQFF	TRBV29-1*01	TRBJ2-1*01
CASRQEGLWGDYGYTF	TRBV28*01	TRBJ1-2*01
CASSVAMNGGALEQYF	TRBV9*01	TRBJ2-7*01
CASSSGSTEAFF	TRBV7-9*01	TRBJ1-1*01
CSVFPGQGLHGYTF	TRBV29-1*01	TRBJ1-2*01
CASSFANSNQPQHF	TRBV12-4*01	TRBJ1-5*01
CSARRTRWTGELFF	TRBV20-1*01	TRBJ2-2*01
CSVVDRISYEQYF	TRBV29-1*01	TRBJ2-7*01
CASSPPPYNEQFF	TRBV5-1*01	TRBJ2-1*01
CASSEDYQPQHF	TRBV2*01	TRBJ1-5*01
CASSQGLVSTDTQYF	TRBV4-1*01	TRBJ2-3*01
CASRPASGGVRDTQYF	TRBV10-2*01	TRBJ2-3*01
CASSLGLATNEQFF	TRBV5-1*01	TRBJ2-1*01
CSARYLGGTGELFF	TRBV20-1*01	TRBJ2-2*01
CSAWTSGLYNEQFF	TRBV20-1*01	TRBJ2-1*01
CASSQGTLQETQYF	TRBV3-1*01	TRBJ2-5*01
CASSFGGPIGEQFF	TRBV7-2*01	TRBJ2-1*01
CASSYWGFGQPQHF	TRBV5-5*01	TRBJ1-5*01
CSVGVVEKLFF	TRBV29-1*01	TRBJ1-4*01
CASSPEGLADYNEQFF	TRBV9*01	TRBJ2-1*01
CASSPGPRQHF	TRBV28*01	TRBJ1-5*01
CASSSTGEQFF	TRBV28*01	TRBJ2-1*01
CATSDFDRIRGYTF	TRBV24-1*01	TRBJ1-2*01
CASSLGQAIGEQYF	TRBV27*01	TRBJ2-7*01
CASSSRDTEAFF	TRBV7-9*01	TRBJ1-1*01
CASSSAQYEQYF	TRBV7-9*01	TRBJ2-7*01
CSASRSGTGGYNEQFF	TRBV20-1*01	TRBJ2-1*01
CASSEALGQPYEQYF	TRBV6-1*01	TRBJ2-7*01
CASSLGWMNTEAFF	TRBV9*01	TRBJ1-1*01
CASSLGLYNEQFF	TRBV7-9*01	TRBJ2-1*01
CASTTGYRGDNSPLHF	TRBV27*01	TRBJ1-6*01
CASSFIGASDTQYF	TRBV28*01	TRBJ2-3*01
CASCQFYNEQFF	TRBV28*01	TRBJ2-1*01
CASSSAPAQYF	TRBV7-2*01	TRBJ2-7*01
CASSIGTDTQYF	TRBV11-2*01	TRBJ2-3*01
CASRIETGQRANEQFF	TRBV5-1*01	TRBJ2-1*01
CASSSSSGSEQYF	TRBV5-1*01	TRBJ2-7*01
CASSESQQNTEAFF	TRBV2*01	TRBJ1-1*01
CSVLGTLENYGYTF	TRBV29-1*01	TRBJ1-2*01
CASRQGYGYTF	TRBV12-4*01	TRBJ1-2*01
CASSVGTGPGEQYF	TRBV27*01	TRBJ2-7*01
CSVVNPGTGYGYTF	TRBV29-1*01	TRBJ1-2*01
CASSQPPGAGANVLTF	TRBV6-5*01	TRBJ2-6*01
CASSLGRAPTDTQYF	TRBV7-9*01	TRBJ2-3*01
CSASGHTEAFF	TRBV20-1*01	TRBJ1-1*01
CASSPLAGGEEDTQYF	TRBV3-1*01	TRBJ2-3*01
CASSPGPNSPLHF	TRBV7-3*01	TRBJ1-6*01
CASSFSGLVGGYTF	TRBV11-2*01	TRBJ1-2*01
CASSIQANTGELFF	TRBV7-9*01	TRBJ2-2*01
CSARERGPGEKLFF	TRBV20-1*01	TRBJ1-4*01
CASSFKGQPQHF	TRBV28*01	TRBJ1-5*01
CASSQAHGELFF	TRBV3-1*01	TRBJ2-2*01
CSSFLSNEQFF	TRBV29-1*01	TRBJ2-1*01
CASSQVPGRETQYF	TRBV4-1*01	TRBJ2-5*01
CASSPRFGDGANVLTF	TRBV7-9*01	TRBJ2-6*01
CASSQTEGTEYYEQYF	TRBV4-2*01	TRBJ2-7*01
CASSQVRTGGYEQYF	TRBV4-1*01	TRBJ2-7*01
CASRKKWTSPRTETFF	TRBV10-2*01	TRBJ1-1*01
CSVGTSGNYEQYF	TRBV29-1*01	TRBJ2-7*01
CASRGTGRLGEQFF	TRBV2*01	TRBJ2-1*01
CASSPRYGGTTDTQYF	TRBV14*01	TRBJ2-3*01
CASSLTGDGANEKLFF	TRBV7-9*01	TRBJ1-4*01
CSVTILGTEAFF	TRBV29-1*01	TRBJ1-1*01
CASSSGSEKLFF	TRBV12-4*01	TRBJ1-4*01
CASSQKRRLADNYEQYF	TRBV7-8*01	TRBJ2-7*01
CASSWTGTAYEQYF	TRBV27*01	TRBJ2-7*01
CSGGQGSYEQYF	TRBV29-1*01	TRBJ2-7*01
CASSLGAGGRYEQYF	TRBV7-2*01	TRBJ2-7*01
CASINDRRKEQYF	TRBV7-2*01	TRBJ2-7*01
CATSGIGDRYYNEQFF	TRBV24-1*01	TRBJ2-1*01
CASSQDITVQETQYF	TRBV4-1*01	TRBJ2-5*01
CATSRDAGRSPLNF	TRBV15*01	TRBJ1-6*01
CATSDGLGTPLNEQFF	TRBV24-1*01	TRBJ2-1*01
CASSQDAGYGYTF	TRBV3-1*01	TRBJ1-2*01
CASTPDTSSYEQYF	TRBV28*01	TRBJ2-7*01
CASSLGISGRPSYEQYF	TRBV7-2*01	TRBJ2-7*01
CASSPTPPGGLTYNEQFF	TRBV11-2*01	TRBJ2-1*01
CASSHTQGAEAFF	TRBV4-3*01	TRBJ1-1*01
CATLGAGANVLTF	TRBV28*01	TRBJ2-6*01
CASSLSGSYNSPLHF	TRBV27*01	TRBJ1-6*01
CASRDSPSNTGELFF	TRBV14*01	TRBJ2-2*01
CASSLRGSTDTQYF	TRBV12-4*01	TRBJ2-3*01
CASSATGGEQYF	TRBV9*01	TRBJ2-7*01
CAISEGGEQYF	TRBV10-3*01	TRBJ2-7*01
CASSQDEGRVEQYF	TRBV5-1*01	TRBJ2-7*01
CASSGTGERGYTF	TRBV7-9*01	TRBJ1-2*01
CASSRRRQGVGDEQFF	TRBV4-2*01	TRBJ2-1*01
CSVGDRVSYEQYF	TRBV29-1*01	TRBJ2-7*01
CASSQGELAGVNEQFF	TRBV4-2*01	TRBJ2-1*01
CSAEKLRAAPYNEQFF	TRBV20-1*01	TRBJ2-1*01
CASSLRTGTAPYEQYF	TRBV28*01	TRBJ2-7*01
CASSLGTGGSWEQYF	TRBV4-1*01	TRBJ2-7*01
CSARDPISYEQYF	TRBV20-1*01	TRBJ2-7*01
CASIRLRETQYF	TRBV7-9*01	TRBJ2-5*01
CASSYSLGGSSTGELFF	TRBV6-1*01	TRBJ2-2*01
CASSLFGEQFF	TRBV27*01	TRBJ2-1*01
CASSQGTGIVDEQYF	TRBV3-1*01	TRBJ2-7*01
CSAQYPGQGASNQPQHF	TRBV20-1*01	TRBJ1-5*01
CASSQGQGNEQFF	TRBV4-1*01	TRBJ2-1*01
CASSLSRGDEQFF	TRBV5-1*01	TRBJ2-1*01
CASSPGTSGVSDTQYF	TRBV3-1*01	TRBJ2-3*01
CASSLPGGTQETQYF	TRBV27*01	TRBJ2-5*01
CASRSPRVHEQYF	TRBV7-6*01	TRBJ2-7*01
CASSPNPGTGIYEQYF	TRBV4-1*01	TRBJ2-7*01
CASSVGTGRDTEAFF	TRBV9*01	TRBJ1-1*01
CASRPGQTNYGYTF	TRBV2*01	TRBJ1-2*01
CASSVLALGANVLTF	TRBV19*01	TRBJ2-6*01
CASSQVGGLTDTQYF	TRBV4-3*01	TRBJ2-3*01
CASSMDRIGGYTF	TRBV12-4*01	TRBJ1-2*01
CASRIHSTSGNNEQYF	TRBV28*01	TRBJ2-7*01
CATSRSSGANVLTF	TRBV5-1*01	TRBJ2-6*01
CASSFAGPEYGYTF	TRBV27*01	TRBJ1-2*01
CASSADERENEQFF	TRBV9*01	TRBJ2-1*01
CASSPIDRGGTDTQYF	TRBV7-9*01	TRBJ2-3*01
CARGLTPYNEQFF	TRBV2*01	TRBJ2-1*01
CSVEGTGKCNQPQHF	TRBV29-1*01	TRBJ1-5*01
CATSDTSGGPYNEQFF	TRBV24-1*01	TRBJ2-1*01
CASSDGQVNTGELFF	TRBV27*01	TRBJ2-2*01
CASSHGTSDINEQFF	TRBV7-9*01	TRBJ2-1*01
CASSQEAATYYEQYF	TRBV4-3*01	TRBJ2-7*01
CAWIQGAYEQYF	TRBV30*01	TRBJ2-7*01
CSVEDFGSPYEQYF	TRBV29-1*01	TRBJ2-7*01
CSVINPNEKLFF	TRBV29-1*01	TRBJ1-4*01
CASSPRSRRVTGELFF	TRBV28*01	TRBJ2-2*01
CASSRRPGIIGYEQYF	TRBV27*01	TRBJ2-7*01
CASSLTPPSQYF	TRBV7-2*01	TRBJ2-3*01
CASSPGTASTDTQYF	TRBV11-2*01	TRBJ2-3*01
CASSYSQGYNQPQHF	TRBV6-1*01	TRBJ1-5*01
CASSLTSGRTEQFF	TRBV27*01	TRBJ2-1*01
CASSLFSGGMGRGFVNTEAFF	TRBV27*01	TRBJ1-1*01
CSSVGATRQETQYF	TRBV29-1*01	TRBJ2-5*01
CASSPSAYEQYF	TRBV12-4*01	TRBJ2-7*01
CASSRDRVGETQYF	TRBV5-1*01	TRBJ2-5*01
CASPGASGDTGELFF	TRBV7-9*01	TRBJ2-2*01
CSVRDRISYEQYF	TRBV29-1*01	TRBJ2-7*01
CASSLTGRENSPLHF	TRBV7-3*01	TRBJ1-6*01
CSASRTGTGGYNEQFF	TRBV20-1*01	TRBJ2-1*01
CASSLSGGAGLGYTF	TRBV27*01	TRBJ1-2*01
CASSSPGDDTQYF	TRBV7-3*01	TRBJ2-3*01
CASSSEGLWYQPQHF	TRBV5-1*01	TRBJ1-5*01
CASALGSSYNEQFF	TRBV12-5*01	TRBJ2-1*01
CATSDPAKGEEQYF	TRBV24-1*01	TRBJ2-7*01
CASSAQGDSNQPQHF	TRBV5-5*01	TRBJ1-5*01
CASRDSLGTGELFF	TRBV10-2*01	TRBJ2-2*01
CASSPYDRVEQYF	TRBV3-1*01	TRBJ2-7*01
CASSFSRGDEQFF	TRBV5-1*01	TRBJ2-1*01
CASSQGRDAFRYGANVLTF	TRBV4-1*01	TRBJ2-6*01
CASSLSGAGDSNQPQHF	TRBV7-9*01	TRBJ1-5*01
CASSEHIGQNTEAFF	TRBV10-1*01	TRBJ1-1*01
CASSFGGANTGELFF	TRBV3-1*01	TRBJ2-2*01
CASSPIWDQPQHF	TRBV7-2*01	TRBJ1-5*01
CASRTARDSGTQYF	TRBV7-2*01	TRBJ2-5*01
CASSLAGYTQYF	TRBV12-4*01	TRBJ2-3*01
CASTRTVDNEKLFF	TRBV6-5*01	TRBJ1-4*01
CASSTSQGGEQYF	TRBV7-6*01	TRBJ2-7*01
CASSQDSGYGYTF	TRBV4-1*01	TRBJ1-2*01
CASSLWDSEGQPQHF	TRBV12-4*01	TRBJ1-5*01
CASSPRGGGMRNTEAFF	TRBV18*01	TRBJ1-1*01
CASSLPTRLPIRYEQYF	TRBV7-2*01	TRBJ2-7*01
CASTVGAGNIQYF	TRBV10-2*01	TRBJ2-4*01
CSVRTSGRLDEQFF	TRBV29-1*01	TRBJ2-1*01
CASSLGRTGKHPGELFF	TRBV12-4*01	TRBJ2-2*01
CASSIQGGDTEAFF	TRBV12-4*01	TRBJ1-1*01
CASSKDTNSGANVLTF	TRBV6-9*01	TRBJ2-6*01
CASSSGLAGYTGELFF	TRBV12-4*01	TRBJ2-2*01
CASRRQGGGQPQHF	TRBV2*01	TRBJ1-5*01
CASSPSWRGGAGELFF	TRBV7-8*01	TRBJ2-2*01
CSVVSANSYEQYF	TRBV29-1*01	TRBJ2-7*01
CAISEGGGPDTQYF	TRBV10-3*01	TRBJ2-3*01
CASSSPGRLVDTQYF	TRBV7-9*01	TRBJ2-3*01
CASSLGRGAYEQYF	TRBV5-4*01	TRBJ2-7*01
CASRLSAGNYNSPLHF	TRBV27*01	TRBJ1-6*01
CASSGDTSGADTQYF	TRBV5-4*01	TRBJ2-3*01
CASSYDRSYSYEQYF	TRBV6-5*01	TRBJ2-7*01
CASISGQGKRNTEAFF	TRBV7-9*01	TRBJ1-1*01
CASSSFTEAFF	TRBV12-4*01	TRBJ1-1*01
CASSQDTGLNIQYF	TRBV4-1*01	TRBJ2-4*01
CASSQEAGTDTQYF	TRBV4-3*01	TRBJ2-3*01
CASSPGTSGETQYF	TRBV5-1*01	TRBJ2-5*01
CAGGSSGLSYEQYF	TRBV11-3*01	TRBJ2-7*01
CASSQEGGQLFF	TRBV4-1*01	TRBJ1-4*01
CASSPGARGAQETQYF	TRBV6-6*01	TRBJ2-5*01
CASSGTNTGELFF	TRBV9*01	TRBJ2-2*01
CASSQIDGNEQFF	TRBV4-2*01	TRBJ2-1*01
CASSQDGRAGELFF	TRBV4-1*01	TRBJ2-2*01
CASAWAVGAYEQYF	TRBV27*01	TRBJ2-7*01
CSVDSLGNTEAFF	TRBV29-1*01	TRBJ1-1*01
CSAPGTSGSDTQYF	TRBV20-1*01	TRBJ2-3*01
CASSTITRGRSTDTQYF	TRBV28*01	TRBJ2-3*01
CASGQPGQAHGYTF	TRBV12-5*01	TRBJ1-2*01
CASSEGPSGPINQPQHF	TRBV25-1*01	TRBJ1-5*01
CASSVGSLSTDTQYF	TRBV9*01	TRBJ2-3*01
CASSSGQGAGNTIYF	TRBV4-1*01	TRBJ1-3*01
CSVGVPQETQYF	TRBV29-1*01	TRBJ2-5*01
CASIRGLRGNQPQHF	TRBV27*01	TRBJ1-5*01
CASSAYPRTGMAYEQYF	TRBV28*01	TRBJ2-7*01
CASSLGQGYNEQFF	TRBV7-9*01	TRBJ2-1*01
CASRTRSGANVLTF	TRBV2*01	TRBJ2-6*01
CASSGTGADTQYF	TRBV5-1*01	TRBJ2-3*01
CASSWAGMSEAFF	TRBV27*01	TRBJ1-1*01
CASGLTGGQPQHF	TRBV12-5*01	TRBJ1-5*01
CASSQEGHEQFF	TRBV3-1*01	TRBJ2-1*01
CASSPRSGDTGELFF	TRBV7-2*01	TRBJ2-2*01
CASIRTEEEGYTF	TRBV2*01	TRBJ1-2*01
CASSQGQGYTEAFF	TRBV12-4*01	TRBJ1-1*01
CASSLGQGAGEQYF	TRBV27*01	TRBJ2-7*01
CASSQVPGNNEQFF	TRBV4-1*01	TRBJ2-1*01
CASSWTGEGTEAFF	TRBV7-6*01	TRBJ1-1*01
CASSLSRGRADTQYF	TRBV6-5*01	TRBJ2-3*01
CASSPLRADQGRRNEQFF	TRBV11-2*01	TRBJ2-1*01
CASSKTGSYQPQHF	TRBV7-2*01	TRBJ1-5*01
CARDTGQGTEAFF	TRBV2*01	TRBJ1-1*01
CASSQDPVNTEAFF	TRBV4-1*01	TRBJ1-1*01
CASSLGGLAFNEQFF	TRBV28*01	TRBJ2-1*01
CSVGDGELFF	TRBV29-1*01	TRBJ2-2*01
CSVLRVEQFF	TRBV29-1*01	TRBJ2-1*01
CASSSTGQGANEKLFF	TRBV7-9*01	TRBJ1-4*01
CAISGDVSDEQYF	TRBV10-3*01	TRBJ2-7*01
CASSPGQREQFF	TRBV12-4*01	TRBJ2-1*01
CATSSSRVGETQYF	TRBV15*01	TRBJ2-5*01
CASSPGGNYGYTF	TRBV28*01	TRBJ1-2*01
CSATQGLGSYEQYF	TRBV29-1*01	TRBJ2-7*01
CASSSQGPERGTQYF	TRBV12-4*01	TRBJ2-5*01
CASSLERGDRDEQFF	TRBV7-6*01	TRBJ2-1*01
CASRVAGAPVYEQYF	TRBV5-1*01	TRBJ2-7*01
CASSQELGPRTTEAFF	TRBV4-2*01	TRBJ1-1*01
CASSHETGTSAAPWTGELFF	TRBV3-1*01	TRBJ2-2*01
CASNRGFSTGELFF	TRBV6-6*01	TRBJ2-2*01
CASSLVDNWETQYF	TRBV7-9*01	TRBJ2-5*01
CASSPTPPLGYF	TRBV7-2*01	TRBJ2-3*01
CASSWNTGELFF	TRBV5-1*01	TRBJ2-2*01
CASSQSGLISGNTIYF	TRBV12-4*01	TRBJ1-3*01
CASSLLATGDTQYF	TRBV28*01	TRBJ2-3*01
CATSDELAGPGYNEQFF	TRBV24-1*01	TRBJ2-1*01
CSAQLGTQYF	TRBV29-1*01	TRBJ2-5*01
CASSPGGNSPLHF	TRBV6-1*01	TRBJ1-6*01
CASGGTNTGELFF	TRBV6-5*01	TRBJ2-2*01
CSAWEAGDYGYTF	TRBV20-1*01	TRBJ1-2*01
CASGLGPNTEAFF	TRBV12-5*01	TRBJ1-1*01
CASSPRRGSALNEQFF	TRBV7-9*01	TRBJ2-1*01
CSTGQGLNTEAFF	TRBV29-1*01	TRBJ1-1*01
CASSQLSGGYTF	TRBV4-1*01	TRBJ1-2*01
CSVPGDYETQYF	TRBV29-1*01	TRBJ2-5*01
CSVVSGDRQYF	TRBV29-1*01	TRBJ2-5*01
CASGLAGAGYTGELFF	TRBV12-5*01	TRBJ2-2*01
CASSSRTEQYF	TRBV11-2*01	TRBJ2-5*01
CASSSPRDTFTGELFF	TRBV6-5*01	TRBJ2-2*01
CASKPQGPAYEQYF	TRBV28*01	TRBJ2-7*01
CATSDSPSGGAETQYF	TRBV24-1*01	TRBJ2-5*01
CSARPGTEQFF	TRBV29-1*01	TRBJ2-1*01
CASSLNPYNEQFF	TRBV7-2*01	TRBJ2-1*01
CASSFNHYNSPLHF	TRBV7-3*01	TRBJ1-6*01
CASSPARDRGLLFGGYTF	TRBV6-9*01	TRBJ1-2*01
CASSPWTGTGYGYTF	TRBV6-5*01	TRBJ1-2*01
CASSPQKGYAYEQYF	TRBV4-1*01	TRBJ2-7*01
CASSYSTDTQYF	TRBV5-4*01	TRBJ2-3*01
CASSERDSFYEQYF	TRBV6-6*01	TRBJ2-7*01
CASSPGLAGDTDTQYF	TRBV5-1*01	TRBJ2-3*01
CASSFGNTIYF	TRBV12-4*01	TRBJ1-3*01
CASSQEAHSYEQYF	TRBV4-1*01	TRBJ2-7*01
CSGAVMNTEAFF	TRBV20-1*01	TRBJ1-1*01
CASRLTTNTGELFF	TRBV7-8*01	TRBJ2-2*01
CASSYSIGTGVGYEQYF	TRBV6-5*01	TRBJ2-7*01
CATGPSGANVLTF	TRBV28*01	TRBJ2-6*01
CSSGLVGTEQFF	TRBV29-1*01	TRBJ2-1*01
CASIRDRAGELFF	TRBV12-4*01	TRBJ2-2*01
CASSHLLAGGNNEQFF	TRBV4-1*01	TRBJ2-1*01
CASSQDTTNQPQHF	TRBV3-1*01	TRBJ1-5*01
CASSQDANTEAFF	TRBV4-1*01	TRBJ1-1*01
CASGLVRAGSYEQYF	TRBV12-5*01	TRBJ2-7*01
CASSQLGTTSYNEQFF	TRBV4-3*01	TRBJ2-1*01
CASSQELGRTEAFF	TRBV4-2*01	TRBJ1-1*01
CASSLRHTELYEQYF	TRBV3-1*01	TRBJ2-7*01
CASSQDAGRGYTF	TRBV3-1*01	TRBJ1-2*01
CASSQELTNYGYTF	TRBV4-1*01	TRBJ1-2*01
CASSLAQIIDQPQHF	TRBV28*01	TRBJ1-5*01
CASSYLRGENSPLHF	TRBV27*01	TRBJ1-6*01
CASSLGQGVGEQYF	TRBV27*01	TRBJ2-7*01
CASSATPGATYEQYF	TRBV6-5*01	TRBJ2-7*01
CASSLDGFETEAFF	TRBV7-6*01	TRBJ1-1*01
CASSPAAAGLTGELFF	TRBV4-3*01	TRBJ2-2*01
CASSLYRGLYNEQFF	TRBV7-2*01	TRBJ2-1*01
CASSQDIRASGGRTSDTQYF	TRBV4-1*01	TRBJ2-3*01
CASSELAGINTEAFF	TRBV2*01	TRBJ1-1*01
CASSPNTGELFF	TRBV7-6*01	TRBJ2-2*01
CASSFDAPSPLHF	TRBV27*01	TRBJ1-6*01
CASSQLAGKETQYF	TRBV27*01	TRBJ2-5*01
CASSYQEGNIQYF	TRBV6-5*01	TRBJ2-4*01
CASSQDAQYTGELFF	TRBV4-3*01	TRBJ2-2*01
CASSQEGTSSTDTQYF	TRBV4-3*01	TRBJ2-3*01
CASRGLEETQYF	TRBV27*01	TRBJ2-5*01
CSVVQGAGEKLFF	TRBV29-1*01	TRBJ1-4*01
CASSSTGPSEAFF	TRBV12-4*01	TRBJ1-1*01
CASSFDRKGYTF	TRBV7-6*01	TRBJ1-2*01
CASSSTGSGSRAYEQYF	TRBV7-8*01	TRBJ2-7*01
CSATRDRDQAWNTEAFF	TRBV20-1*01	TRBJ1-1*01
CASSLGTDTQYF	TRBV9*01	TRBJ2-3*01
CASRGVGTQYF	TRBV28*01	TRBJ2-3*01
CSAGSSYEQYF	TRBV20-1*01	TRBJ2-7*01
CASSSDQNTGELFF	TRBV6-1*01	TRBJ2-2*01
CASSDLLSGEQYF	TRBV9*01	TRBJ2-7*01
CASSQEGGGGYGYTF	TRBV4-2*01	TRBJ1-2*01
CASSQDAREELFF	TRBV4-3*01	TRBJ1-4*01
CASSRFSGTQSYEQYF	TRBV27*01	TRBJ2-7*01
CASSPSTSGEQYF	TRBV4-1*01	TRBJ2-7*01
CASSRIWGGPDTQYF	TRBV2*01	TRBJ2-3*01
CASTDKGYRAGYTF	TRBV4-1*01	TRBJ1-2*01
CASIGGGGTDTQYF	TRBV6-1*01	TRBJ2-3*01
CSGGQYNEQFF	TRBV29-1*01	TRBJ2-1*01
CASNPLSSYEQYF	TRBV7-9*01	TRBJ2-7*01
CASSQGTIRDEKLFF	TRBV7-8*01	TRBJ1-4*01
CASSLAEGEQYF	TRBV7-6*01	TRBJ2-7*01
CASSSSSSGGETQYF	TRBV27*01	TRBJ2-5*01
CASTMTSSYNEQFF	TRBV6-6*01	TRBJ2-1*01
CASSVGGGSYEQYF	TRBV9*01	TRBJ2-7*01
CASSLGRRGYTF	TRBV28*01	TRBJ1-2*01
CSVMDRADSPLHF	TRBV29-1*01	TRBJ1-6*01
CSVAGSITEAFF	TRBV29-1*01	TRBJ1-1*01
CASSSGTGRSTDTQYF	TRBV7-8*01	TRBJ2-3*01
CASSPTGGEQYF	TRBV9*01	TRBJ2-7*01
CASSLVGASSYEQYF	TRBV5-4*01	TRBJ2-7*01
CASSMLAGRSNQPQHF	TRBV19*01	TRBJ1-5*01
CASSLIAGNEQFF	TRBV28*01	TRBJ2-1*01
CASSSLLVPQYF	TRBV12-4*01	TRBJ2-5*01
CAIGTSGAYEQYF	TRBV2*01	TRBJ2-7*01
CASSSNTGTEQYF	TRBV11-2*01	TRBJ2-7*01
CASSLLGQGYEQYF	TRBV27*01	TRBJ2-7*01
CASSLPWGEETQYF	TRBV5-5*01	TRBJ2-5*01
CASSLGSRLETQYF	TRBV11-2*01	TRBJ2-5*01
CSVDYGYTF	TRBV29-1*01	TRBJ1-2*01
CASSLAWGYTDTQYF	TRBV11-2*01	TRBJ2-3*01
CASSYLQEGLVEQFF	TRBV6-1*01	TRBJ2-1*01
CASSPPDSFSYEQYF	TRBV6-9*01	TRBJ2-7*01
CASSQDTGYGYTF	TRBV3-1*01	TRBJ1-2*01
CASSPSTGLTQPQHF	TRBV28*01	TRBJ1-5*01
CSVEPGDSYEQYF	TRBV29-1*01	TRBJ2-7*01
CASSLGGGNEQFF	TRBV7-9*01	TRBJ2-1*01
CASSYKAPGELFF	TRBV4-2*01	TRBJ2-2*01
CASSLGRRFGSGELFF	TRBV7-8*01	TRBJ2-2*01
CASTISWGETQYF	TRBV6-5*01	TRBJ2-5*01
CASSSGNTGELFF	TRBV7-3*01	TRBJ2-2*01
CASSLNEKLFF	TRBV11-2*01	TRBJ1-4*01
CASSRLAGRYNEQFF	TRBV6-1*01	TRBJ2-1*01
CSVWPGLATDTQYF	TRBV29-1*01	TRBJ2-3*01
CAWREIYEQYF	TRBV30*01	TRBJ2-7*01
CSVDNRGYEQFF	TRBV29-1*01	TRBJ2-1*01
CASSLESGYSNQPQHF	TRBV11-2*01	TRBJ1-5*01
CSARDELADSTDTQYF	TRBV20-1*01	TRBJ2-3*01
CSASSRTRGNEQFF	TRBV20-1*01	TRBJ2-1*01
CASSLGNNEQFF	TRBV7-6*01	TRBJ2-1*01
CASRIQGQPQHF	TRBV28*01	TRBJ1-5*01
CASTQGRGAEAFF	TRBV11-2*01	TRBJ1-1*01
CASSLNPSGDTSKRAQYF	TRBV11-2*01	TRBJ2-5*01
CASSNLPGTASRRNTEAFF	TRBV28*01	TRBJ1-1*01
CASSPGQGSTDTQYF	TRBV18*01	TRBJ2-3*01
CASSVGGLAYNEQFF	TRBV9*01	TRBJ2-1*01
CASSFGYTEAFF	TRBV28*01	TRBJ1-1*01
CASSAAGTGGGYEQYF	TRBV5-6*01	TRBJ2-7*01
CASSFWGNNEQFF	TRBV11-2*01	TRBJ2-1*01
CSARVGRAAPAYNEQFF	TRBV20-1*01	TRBJ2-1*01
CASSQDAGRNEQFF	TRBV4-1*01	TRBJ2-1*01
CASSPPGSSGIQYF	TRBV7-9*01	TRBJ2-4*01
CARPPRSYF	TRBV10-1*01	TRBJ2-7*01
CASCRTGENTDTQYF	TRBV7-3*01	TRBJ2-3*01
CASTLGAFYTEAFF	TRBV6-1*01	TRBJ1-1*01
CSASRQAAYSNQPQHF	TRBV20-1*01	TRBJ1-5*01
CSVALTGKGDTQYF	TRBV29-1*01	TRBJ2-3*01
CASSPYSVRTDTQYF	TRBV7-6*01	TRBJ2-3*01
CASSYTRQGTSYEQYF	TRBV6-5*01	TRBJ2-7*01
CASASSGSANTGELFF	TRBV9*01	TRBJ2-2*01
CSDRMWGAADTQYF	TRBV29-1*01	TRBJ2-3*01
CASSPLGTALIPNTGELFF	TRBV27*01	TRBJ2-2*01
CASSFKTSGVDTQYF	TRBV27*01	TRBJ2-3*01
CASSQELAGAYEQYF	TRBV4-2*01	TRBJ2-7*01
CASSLQNRATYEQYF	TRBV5-8*01	TRBJ2-7*01
CASSVVPDYNEQFF	TRBV9*01	TRBJ2-1*01
CASSPAAGAGTGELFF	TRBV7-3*01	TRBJ2-2*01
CASSQDGGAGYNSPLHF	TRBV4-2*01	TRBJ1-6*01
CASTLPTGTKNIQYF	TRBV19*01	TRBJ2-4*01
CASSAWTGGEGGYGYTF	TRBV9*01	TRBJ1-2*01
CSVEGWAGPGLFF	TRBV29-1*01	TRBJ2-2*01
CASSPSGRASNEQFF	TRBV28*01	TRBJ2-1*01
CASSEDAASGYEQYF	TRBV6-1*01	TRBJ2-7*01
CASSQDLTVLLYTF	TRBV4-1*01	TRBJ1-2*01
CASSQQRTGELFF	TRBV14*01	TRBJ2-2*01
CASSFQGITEAFF	TRBV28*01	TRBJ1-1*01
CASSGLAGTDTQYF	TRBV4-1*01	TRBJ2-3*01
CASSQGGKAFF	TRBV4-2*01	TRBJ1-1*01
CSARVRGSTDTQYF	TRBV20-1*01	TRBJ2-3*01
CASSRGASLRADTQYF	TRBV9*01	TRBJ2-3*01
CASSSPGTGDYGYTF	TRBV5-1*01	TRBJ1-2*01
CASSLAGNTEAFF	TRBV7-3*01	TRBJ1-1*01
CASSFLAGVYNEQFF	TRBV9*01	TRBJ2-1*01
CASSQGPLSSYNEQFF	TRBV4-2*01	TRBJ2-1*01
CSASDRVFPYEQYF	TRBV20-1*01	TRBJ2-7*01
CASQGAAEAFF	TRBV4-1*01	TRBJ1-1*01
CASSYGREDTEAFF	TRBV6-6*01	TRBJ1-1*01
CASSQRAGNTGELFF	TRBV4-1*01	TRBJ2-2*01
CASRDRNANTGELFF	TRBV7-6*01	TRBJ2-2*01
CASSSTGTANNEQFF	TRBV28*01	TRBJ2-1*01
CASSQDPRSGGTGELFF	TRBV4-1*01	TRBJ2-2*01
CSAISGTAEAFF	TRBV20-1*01	TRBJ1-1*01
CSVVGLDSNYGYTF	TRBV29-1*01	TRBJ1-2*01
CASSESSWGQPQHF	TRBV2*01	TRBJ1-5*01
CASSLQTSGRGYEQFF	TRBV28*01	TRBJ2-1*01
CASSPPSLTGELFF	TRBV18*01	TRBJ2-2*01
CASSLGGGPNQPQHF	TRBV6-5*01	TRBJ1-5*01
CASSLDGKQTLFNQAFF	TRBV7-2*01	TRBJ1-1*01
CASIPWPTGRTDTQYF	TRBV27*01	TRBJ2-3*01
CASSVDAGPYNEQFF	TRBV9*01	TRBJ2-1*01
CASSSNRQYTDTQYF	TRBV7-9*01	TRBJ2-3*01
CASSQVDRAYEQYF	TRBV4-1*01	TRBJ2-7*01
CASSLYSYEQYF	TRBV7-6*01	TRBJ2-7*01
CASSYGLAQPQHF	TRBV6-6*01	TRBJ1-5*01
CSAQLRTSGSDEQFF	TRBV20-1*01	TRBJ2-1*01
CASSAPGAKRTDTQYF	TRBV12-4*01	TRBJ2-3*01
CASRGEPFAQHF	TRBV28*01	TRBJ1-5*01
CASSNAGQGYEQYF	TRBV12-4*01	TRBJ2-7*01
CASSQGSGARYF	TRBV4-2*01	TRBJ2-5*01
CASSLAGGPHLAKNIQYF	TRBV11-2*01	TRBJ2-4*01
CASSLIQENTEAFF	TRBV27*01	TRBJ1-1*01
CASSENNGLLQETQYF	TRBV10-1*01	TRBJ2-5*01
CASSPQGQAFSGANVLTF	TRBV7-6*01	TRBJ2-6*01
CASSGRDREYSGANVLTF	TRBV27*01	TRBJ2-6*01
CASSPDPGANEKLFF	TRBV18*01	TRBJ1-4*01
CAIWDGGRSLPLHF	TRBV10-3*01	TRBJ1-6*01
CASSPLTGKTEAFF	TRBV18*01	TRBJ1-1*01
CASNPLLYGYTF	TRBV2*01	TRBJ1-2*01
CACQLLGPGELFF	TRBV30*01	TRBJ2-2*01
CASSVEPGSYNEQFF	TRBV9*01	TRBJ2-1*01
CASSQGSSYNSPLHF	TRBV4-1*01	TRBJ1-6*01
CASNPGVLGGTGELFF	TRBV12-4*01	TRBJ2-2*01
CASSFASGRISDEQFF	TRBV7-9*01	TRBJ2-1*01
CASGGSEGEQFF	TRBV5-4*01	TRBJ2-1*01
CASSWGGSYEQYF	TRBV6-5*01	TRBJ2-7*01
CASTGGANEQFF	TRBV5-1*01	TRBJ2-1*01
CASSPFDRDTQYF	TRBV11-2*01	TRBJ2-3*01
CASSFRTGTATEAFF	TRBV7-2*01	TRBJ1-1*01
CASSPQGATSTNEKLFF	TRBV9*01	TRBJ1-4*01
CASSQVRTGQETQYF	TRBV4-2*01	TRBJ2-5*01
CASRGQMNTEAFF	TRBV27*01	TRBJ1-1*01
CSVVSGF	TRBV29-1*01	TRBJ2-3*01
CSVVGLDEQYF	TRBV29-1*01	TRBJ2-7*01
CASSQAARIVEQYF	TRBV7-8*01	TRBJ2-7*01
CASSSQRGGLDTQYF	TRBV12-4*01	TRBJ2-3*01
CASSYDLTGSGIEQYF	TRBV4-3*01	TRBJ2-7*01
CASSFEAVSYNEQFF	TRBV7-2*01	TRBJ2-1*01
CASSATASPVTEAFF	TRBV2*01	TRBJ1-1*01
CASSSGTGFSGYTF	TRBV6-5*01	TRBJ1-2*01
CAISESETRGGDQQFF	TRBV10-3*01	TRBJ2-1*01
CASSLGFLNEQFF	TRBV12-4*01	TRBJ2-1*01
CSVEEASETEAFF	TRBV29-1*01	TRBJ1-1*01
CASSPATNEKLFF	TRBV5-6*01	TRBJ1-4*01
CASSLSTGRGDTEAFF	TRBV5-1*01	TRBJ1-1*01
CASSRTEVRSDTQYF	TRBV14*01	TRBJ2-3*01
CASSQARGTDTQYF	TRBV3-1*01	TRBJ2-3*01
CASSWTVGGDEQFF	TRBV12-4*01	TRBJ2-1*01
CASSPRLNTQYF	TRBV21-1*01	TRBJ2-3*01
CSARREGGNTEAFF	TRBV20-1*01	TRBJ1-1*01
CASWRQGALTGELFF	TRBV28*01	TRBJ2-2*01
CSASSTGGYEQYF	TRBV29-1*01	TRBJ2-7*01
CASSYSSHGDSSTDTQYF	TRBV6-9*01	TRBJ2-3*01
CASNQVNEKLFF	TRBV4-1*01	TRBJ1-4*01
CASSPFDSTWDTQYF	TRBV7-9*01	TRBJ2-3*01
CASGGTLPPEAFF	TRBV7-9*01	TRBJ1-1*01
CASSVSGLQETQYF	TRBV9*01	TRBJ2-5*01
CASSLVDTQYF	TRBV12-4*01	TRBJ2-3*01
CASTIYPPRRRGTEAFF	TRBV6-5*01	TRBJ1-1*01
CASSPMGTSGGASAGELFF	TRBV6-9*01	TRBJ2-2*01
CSARGVSYNEQFF	TRBV20-1*01	TRBJ2-1*01
CASSLGQGSSGNTIYF	TRBV7-2*01	TRBJ1-3*01
CASSPDRNGMNTEAFF	TRBV5-4*01	TRBJ1-1*01
CASSRGQGAETQYF	TRBV4-1*01	TRBJ2-5*01
CASSLITQSSHEQYF	TRBV7-7*01	TRBJ2-7*01
CSARDRGLRDTQYF	TRBV20-1*01	TRBJ2-3*01
CASSFYQGQPQHF	TRBV27*01	TRBJ1-5*01
CASSPLAGELFF	TRBV4-1*01	TRBJ2-2*01
CAVRSDRTYEQYF	TRBV7-9*01	TRBJ2-7*01
CASSQDVSLGGYTF	TRBV4-1*01	TRBJ1-2*01
CASGLSYEVQYF	TRBV28*01	TRBJ2-7*01
CASSQGRSDPQYF	TRBV4-1*01	TRBJ2-5*01
CSAREPVSYEQYF	TRBV20-1*01	TRBJ2-7*01
CASGLWVNGELFF	TRBV12-5*01	TRBJ2-2*01
CASSQEPDNTEAFF	TRBV4-1*01	TRBJ1-1*01
CASTQIGTPDEQFF	TRBV5-1*01	TRBJ2-1*01
CASSLLSRELSNEQFF	TRBV7-6*01	TRBJ2-1*01
CASSLLAPSNTEAFF	TRBV5-5*01	TRBJ1-1*01
CSAGSRTSGYNEQFF	TRBV20-1*01	TRBJ2-1*01
CSAGTAFEQYF	TRBV20-1*01	TRBJ2-7*01
CASSPRQGRRNTEAFF	TRBV25-1*01	TRBJ1-1*01
CASRSWGQGGNEQFF	TRBV28*01	TRBJ2-1*01
CASSFGLAGTQETQYF	TRBV5-1*01	TRBJ2-5*01
CSARDAGQPEKLFF	TRBV20-1*01	TRBJ1-4*01
CSARVAHEGQPQHF	TRBV20-1*01	TRBJ1-5*01
CASSLGQVYNEQFF	TRBV28*01	TRBJ2-1*01
CASSPLSGTAPPQHF	TRBV5-1*01	TRBJ1-5*01
CASSIADSNTGELFF	TRBV19*01	TRBJ2-2*01
CASSQGQDYSGANVLTF	TRBV4-1*01	TRBJ2-6*01
CASSPGPNTYEQYF	TRBV5-1*01	TRBJ2-7*01
CASKNQETQYF	TRBV28*01	TRBJ2-5*01
CASSGGAQNSPLHF	TRBV27*01	TRBJ1-6*01
CASSRLAGASRGTDTQYF	TRBV7-2*01	TRBJ2-3*01
CASSPRDSRNQPQHF	TRBV12-4*01	TRBJ1-5*01
CSVDGPNWEQYF	TRBV29-1*01	TRBJ2-7*01
CSARETGYSYNEQFF	TRBV20-1*01	TRBJ2-1*01
CASSLIMNTEAFF	TRBV27*01	TRBJ1-1*01
CASGLNTEAFF	TRBV12-5*01	TRBJ1-1*01
CASSHAPYSGELFF	TRBV4-1*01	TRBJ2-2*01
CASSFSPLGEAFF	TRBV27*01	TRBJ1-1*01
CSASSRTREQFF	TRBV20-1*01	TRBJ2-1*01
CASSFGQGLGEQYF	TRBV27*01	TRBJ2-7*01
CASSPSGNEQFF	TRBV7-2*01	TRBJ2-1*01
CASSSGTSGGEQFF	TRBV7-6*01	TRBJ2-1*01
CASSSWTSVPYF	TRBV7-9*01	TRBJ2-5*01
CASSPSNPAFF	TRBV7-2*01	TRBJ1-1*01
CASSQAANYGYTF	TRBV4-1*01	TRBJ1-2*01
CASSQSHDPIYEQYF	TRBV4-1*01	TRBJ2-7*01
CASSDSSGANVLTF	TRBV5-6*01	TRBJ2-6*01
CASSLGSRGLNTEAFF	TRBV5-1*01	TRBJ1-1*01
CATSDKRGPNTDTQYF	TRBV24-1*01	TRBJ2-3*01
CSVEVNRGQSSYEQYF	TRBV29-1*01	TRBJ2-7*01
CASSQDPKMNTEAFF	TRBV4-1*01	TRBJ1-1*01
CASRKTGGYTEAFF	TRBV27*01	TRBJ1-1*01
CASSGVGNYGYTF	TRBV6-5*01	TRBJ1-2*01
CASMYSSYEQYF	TRBV6-1*01	TRBJ2-7*01
CASSRYEQYF	TRBV25-1*01	TRBJ2-7*01
CASSYILHQPQHF	TRBV6-1*01	TRBJ1-5*01
CASSFIIWDSPRDQPQHF	TRBV12-4*01	TRBJ1-5*01
CSARDRVTYEQYF	TRBV20-1*01	TRBJ2-7*01
CASSQPGPGTAHGYTF	TRBV7-9*01	TRBJ1-2*01
CASSYLQGMTGELFF	TRBV6-5*01	TRBJ2-2*01
CSVEDNNEQFF	TRBV29-1*01	TRBJ2-1*01
CSVEQGTEAFF	TRBV29-1*01	TRBJ1-1*01
CASSLGLAGGIGELFF	TRBV7-6*01	TRBJ2-2*01
CSASPGGTEAFF	TRBV20-1*01	TRBJ1-1*01
CASGLVGVYTDTQYF	TRBV12-5*01	TRBJ2-3*01
CASAGLPGTHQYSNQPQHF	TRBV28*01	TRBJ1-5*01
CASSSPSGANVLTF	TRBV28*01	TRBJ2-6*01
CAVGAGHEQFF	TRBV27*01	TRBJ2-1*01
CASSLGTAPIQETQYF	TRBV7-9*01	TRBJ2-5*01
CAWTHADEKLFF	TRBV30*01	TRBJ1-4*01
CASSLYQGPTDTQYF	TRBV5-6*01	TRBJ2-3*01
CASSFEQGAVYEQYF	TRBV5-4*01	TRBJ2-7*01
CSARETSGALQETQYF	TRBV20-1*01	TRBJ2-5*01
CASSQGPTVNTEAFF	TRBV4-1*01	TRBJ1-1*01
CASSQAGPNTGELFF	TRBV4-3*01	TRBJ2-2*01
CASSYSVAGGPDEQFF	TRBV6-5*01	TRBJ2-1*01
CASRGSGANVLTF	TRBV7-3*01	TRBJ2-6*01
CASSSGRFSGNTIYF	TRBV12-4*01	TRBJ1-3*01
CASSQDLGTEQFF	TRBV4-2*01	TRBJ2-1*01
CASSLWTDPNQPQHF	TRBV7-8*01	TRBJ1-5*01
CASSALTANYGYTF	TRBV2*01	TRBJ1-2*01
CASSLTLAGSNEQFF	TRBV12-4*01	TRBJ2-1*01
CASSQSNEQYF	TRBV7-8*01	TRBJ2-7*01
CASSTGTGYSYEQYF	TRBV6-1*01	TRBJ2-7*01
CASSSTGGEGKNIQYF	TRBV12-4*01	TRBJ2-4*01
CASSPMREDRGNSPLHF	TRBV5-5*01	TRBJ1-6*01
CASSPETGLKLFF	TRBV27*01	TRBJ1-4*01
CASSQRQGVGDTQYF	TRBV4-3*01	TRBJ2-3*01
CASSQGPGRTRNEQFF	TRBV14*01	TRBJ2-1*01
CASSQDLAHETQYF	TRBV4-1*01	TRBJ2-5*01
CASSYSTGYLFF	TRBV6-5*01	TRBJ1-1*01
CASSEGRTDSSYEQYF	TRBV2*01	TRBJ2-7*01
CASSPGNSYGAAKNIQYF	TRBV5-1*01	TRBJ2-4*01
CASSLDAHQFF	TRBV7-9*01	TRBJ2-1*01
CASTNRGQETQYF	TRBV11-2*01	TRBJ2-5*01
CASSQEWNPDGYTF	TRBV3-1*01	TRBJ1-2*01
CASRAGTQMNTEAFF	TRBV7-9*01	TRBJ1-1*01
CSGRDMLNYEQYF	TRBV29-1*01	TRBJ2-7*01
CASSFVSTDTQYF	TRBV27*01	TRBJ2-3*01
CASSPGTIPITDTQYF	TRBV7-2*01	TRBJ2-3*01
CASSFTGFEAFF	TRBV5-1*01	TRBJ1-1*01
CASSEQGDNSPLHF	TRBV2*01	TRBJ1-6*01
CASSLTGGYRGTDTQYF	TRBV12-4*01	TRBJ2-3*01
CASSPGYTEAFF	TRBV12-4*01	TRBJ1-1*01
CASSPGTGGDEQYF	TRBV5-5*01	TRBJ2-7*01
CASRAKTGTGSSPLHF	TRBV6-6*01	TRBJ1-6*01
CASSLRQINEQFF	TRBV5-1*01	TRBJ2-1*01
CASSQDPKVDSYNEQFF	TRBV4-1*01	TRBJ2-1*01
CASSPQSNYGYTF	TRBV27*01	TRBJ1-2*01
CASSQTGTSVF	TRBV3-1*01	TRBJ2-7*01
CASSQEVRPDYGYTF	TRBV3-1*01	TRBJ1-2*01
CASNNQGHLGNTF	TRBV12-4*01	TRBJ1-2*01
CASSDGQGGADTQYF	TRBV6-4*01	TRBJ2-3*01
CASSLDYTGELFF	TRBV5-1*01	TRBJ2-2*01
CATRTDLIGAFF	TRBV10-3*01	TRBJ1-1*01
CASSYRGRTEAFF	TRBV7-6*01	TRBJ1-1*01
CASRTSAGPYNEQFF	TRBV11-2*01	TRBJ2-1*01
CASSYNYRDTQYF	TRBV12-4*01	TRBJ2-3*01
CSFWSDTQYF	TRBV29-1*01	TRBJ2-3*01
CASSESTPGADEQYF	TRBV4-2*01	TRBJ2-7*01
CASSQGDEQYF	TRBV4-2*01	TRBJ2-7*01
CASSIPRGYYEQYF	TRBV28*01	TRBJ2-7*01
CASGARGGTDNQPQHF	TRBV28*01	TRBJ1-5*01
CASSFSGQGSLDTEAFF	TRBV5-5*01	TRBJ1-1*01
CASSPTVSSTDTQYF	TRBV4-1*01	TRBJ2-3*01
CSVEDRTDYGYTF	TRBV29-1*01	TRBJ1-2*01
CASSLRTGELFF	TRBV27*01	TRBJ2-2*01
CATKGPSANGCYYEQYF	TRBV24-1*01	TRBJ2-7*01
CASGTGIGQPQHF	TRBV12-5*01	TRBJ1-5*01
CASIGSGVTEQYF	TRBV28*01	TRBJ2-7*01
CASSSDRGTSYEQYF	TRBV7-9*01	TRBJ2-7*01
CSARDRGRLTGELFF	TRBV20-1*01	TRBJ2-2*01
CASSRLGSSEQYF	TRBV4-3*01	TRBJ2-7*01
CASSQEPGANTGELFF	TRBV4-1*01	TRBJ2-2*01
CASSQDLGQIYEQYF	TRBV4-3*01	TRBJ2-7*01
CASSQDGRGGAADTQYF	TRBV4-2*01	TRBJ2-3*01
CASSLDRAYGYTF	TRBV7-9*01	TRBJ1-2*01
CASTRDAGSYEQYF	TRBV4-1*01	TRBJ2-7*01
CASSWTYSGANVLTF	TRBV12-4*01	TRBJ2-6*01
CASSLAYSNQPQHF	TRBV7-2*01	TRBJ1-5*01
CSVVTGTETYNEQFF	TRBV20-1*01	TRBJ2-1*01
CATSTGGFTDTQYF	TRBV24-1*01	TRBJ2-3*01
CASSFSSSPYEQYF	TRBV5-4*01	TRBJ2-7*01
CASSYSLPDSTNTGELFF	TRBV6-9*01	TRBJ2-2*01
CATLTGGNYEQYF	TRBV10-3*01	TRBJ2-7*01
CASSQQLAVNEQFF	TRBV14*01	TRBJ2-1*01
CASGFAGELFF	TRBV12-5*01	TRBJ2-2*01
CASSFWGFGQPQHF	TRBV5-5*01	TRBJ1-5*01
CASNVLNQPQHF	TRBV28*01	TRBJ1-5*01
CASSVTSGYNEQFF	TRBV7-9*01	TRBJ2-1*01
CASSQAGGRGEQYF	TRBV4-2*01	TRBJ2-7*01
CASRKGGGYTF	TRBV27*01	TRBJ1-2*01
CSAPRICYEQYF	TRBV29-1*01	TRBJ2-7*01
CASSYSTETANYGYTF	TRBV6-5*01	TRBJ1-2*01
CASRLAGGPHEQFF	TRBV27*01	TRBJ2-1*01
CASSFISGAGSPLHF	TRBV5-8*01	TRBJ1-6*01
CASSLGPSVKETQYF	TRBV7-9*01	TRBJ2-5*01
CASSYVQGIISEQFF	TRBV6-5*01	TRBJ2-1*01
CASSHHGLDPRSLYF	TRBV3-1*01	TRBJ2-7*01
CASSPWTSGKQYF	TRBV7-6*01	TRBJ2-3*01
CAIRGDTEAFF	TRBV10-3*01	TRBJ1-1*01
CASSERTDQPQHF	TRBV6-1*01	TRBJ1-5*01
CSVQVEWYEQYF	TRBV29-1*01	TRBJ2-7*01
CASSFTKAGGTDTQYF	TRBV12-4*01	TRBJ2-3*01
CASSQDHRNEQFF	TRBV4-3*01	TRBJ2-1*01
CASSEFGAATYEQYF	TRBV9*01	TRBJ2-7*01
CASRLAGANTEAFF	TRBV5-1*01	TRBJ1-1*01
CASTRVVGSYNSPLHF	TRBV12-4*01	TRBJ1-6*01
CASSLLTLGPNTEAFF	TRBV12-4*01	TRBJ1-1*01
CASSSSKVTDTQYF	TRBV7-2*01	TRBJ2-3*01
CASIGAERAKNIQYF	TRBV6-6*01	TRBJ2-4*01
CASSASGRPEAFF	TRBV9*01	TRBJ1-1*01
CASSLGDTQYF	TRBV7-2*01	TRBJ2-3*01
CASSQDLRNTEAFF	TRBV4-3*01	TRBJ1-1*01
CASSPRSPNTGELFF	TRBV7-6*01	TRBJ2-2*01
CSVMNTEAFF	TRBV29-1*01	TRBJ1-1*01
CASRGLAGGYEQYF	TRBV12-4*01	TRBJ2-7*01
CSVEGAFKGDTQYF	TRBV29-1*01	TRBJ2-3*01
CASSLTGASSYEQYF	TRBV11-2*01	TRBJ2-7*01
CSVVTLAGGETDTQYF	TRBV29-1*01	TRBJ2-3*01
CASSQVGSDSPLHF	TRBV4-1*01	TRBJ1-6*01
CASSRGQGNEKLFF	TRBV4-1*01	TRBJ1-4*01
CAISERAYEQYF	TRBV10-3*01	TRBJ2-7*01
CASSYSRQGRTETFF	TRBV6-5*01	TRBJ1-1*01
CASSTGREETQYF	TRBV6-5*01	TRBJ2-5*01
CSAGDYEQYF	TRBV20-1*01	TRBJ2-7*01
CATDQTGTEAFF	TRBV5-4*01	TRBJ1-1*01
CASSESRDSNYGYTF	TRBV2*01	TRBJ1-2*01
CASTYPIGGTGELFF	TRBV6-1*01	TRBJ2-2*01
CASRAGLRDEQFF	TRBV12-4*01	TRBJ2-1*01
CASRIAGGTGELFF	TRBV27*01	TRBJ2-2*01
CASYGTSNTGELFF	TRBV27*01	TRBJ2-2*01
CASSSAWGRGQETQYF	TRBV7-8*01	TRBJ2-5*01
CASGTAYQETQYF	TRBV7-9*01	TRBJ2-5*01
CASSSGTASNQPQHF	TRBV5-6*01	TRBJ1-5*01
CASSHGTSYEQFF	TRBV4-1*01	TRBJ2-1*01
CASTRSGAGANVLTF	TRBV28*01	TRBJ2-6*01
CASSPPGSLNEQYF	TRBV7-9*01	TRBJ2-7*01
CSARDRMNTEAFF	TRBV20-1*01	TRBJ1-1*01
CASSLGPNEQFF	TRBV5-4*01	TRBJ2-1*01
CASSPLRGGSTDTQYF	TRBV18*01	TRBJ2-3*01
CASSSPRGLEVTEAFF	TRBV28*01	TRBJ1-1*01
CASSPIGREISYNEQFF	TRBV7-8*01	TRBJ2-1*01
CASSNVAGGSYNEQFF	TRBV3-1*01	TRBJ2-1*01
CASSQGRQGGSPLHF	TRBV4-3*01	TRBJ1-6*01
CASRDRDRAEGAQF	TRBV5-6*01	TRBJ2-5*01
CASSPDPRLAVHEQYF	TRBV4-1*01	TRBJ2-7*01
CASSQDAMTAEQYF	TRBV4-3*01	TRBJ2-7*01
CATSSSGGSNEKLFF	TRBV15*01	TRBJ1-4*01
CASSPIGTGELFF	TRBV12-4*01	TRBJ2-2*01
CASSYSRPSGNQPQHF	TRBV6-5*01	TRBJ1-5*01
CSVAGGDYNEQFF	TRBV29-1*01	TRBJ2-1*01
CASSYDHSDAYGYTF	TRBV6-5*01	TRBJ1-2*01
CASSPSATGGDAKNIQYF	TRBV7-9*01	TRBJ2-4*01
CASSQEPRLMNEKLFF	TRBV4-1*01	TRBJ1-4*01
CASSGRVSYNEQFF	TRBV6-1*01	TRBJ2-1*01
CASSSGLKDTQYF	TRBV6-6*01	TRBJ2-3*01
CASSERESDQPQHF	TRBV2*01	TRBJ1-5*01
CASNFGSHTGELFF	TRBV2*01	TRBJ2-2*01
CASSQELTASGRNEQYF	TRBV4-3*01	TRBJ2-7*01
CSVPNRGSVGVYGYTF	TRBV29-1*01	TRBJ1-2*01
CASSRGSTDTQYF	TRBV12-4*01	TRBJ2-3*01
CASSQDPGSVGYGYTF	TRBV4-1*01	TRBJ1-2*01
CASSHSRPGQGIAAFF	TRBV3-1*01	TRBJ1-1*01
CASSDLTGTEAFF	TRBV6-4*01	TRBJ1-1*01
CASSRGDFSYNEQFF	TRBV4-1*01	TRBJ2-1*01
CKGQGAGFSYNEQFF	TRBV29-1*01	TRBJ2-1*01
CATSIRAFNEQFF	TRBV15*01	TRBJ2-1*01
CASSSQGAGELFF	TRBV27*01	TRBJ2-2*01
CASSLTVGQGGNQPQHF	TRBV12-4*01	TRBJ1-5*01
CSVDLAGPLTF	TRBV29-1*01	TRBJ1-2*01
CASSHLGPRLAGISYEQYF	TRBV4-2*01	TRBJ2-7*01
CASSPSVGVKNQPQHF	TRBV2*01	TRBJ1-5*01
CASSFSGIYNEQFF	TRBV7-3*01	TRBJ2-1*01
CASSHAGFTEAFF	TRBV4-1*01	TRBJ1-1*01
CASRPDGQVMNTEAFF	TRBV6-1*01	TRBJ1-1*01
CASIRGVTYLSSYEQYF	TRBV2*01	TRBJ2-7*01
CASRVQGAPRPDTQYF	TRBV6-6*01	TRBJ2-3*01
CASSHQDYEQYF	TRBV7-8*01	TRBJ2-7*01
CASSLRQGTEAFF	TRBV7-8*01	TRBJ1-1*01
CASSLGGGAAYGYTF	TRBV7-8*01	TRBJ1-2*01
CASRNGKGGFSGNTIYF	TRBV2*01	TRBJ1-3*01
CASSLWVGPTGELFF	TRBV11-2*01	TRBJ2-2*01
CSVGGGDKNTEAFF	TRBV29-1*01	TRBJ1-1*01
CASSLGWRRVNETQYF	TRBV11-2*01	TRBJ2-5*01
CASSQSPGTGSNEQFF	TRBV3-1*01	TRBJ2-1*01
CASIDRDNSYNSPLHF	TRBV6-1*01	TRBJ1-6*01
CSARVPGLNTEAFF	TRBV20-1*01	TRBJ1-1*01
CSVGGQGGRGNIQYF	TRBV29-1*01	TRBJ2-4*01
CASSLRDADYSGANVLTF	TRBV12-4*01	TRBJ2-6*01
CASSPGRFLRGTEAFF	TRBV21-1*01	TRBJ1-1*01
CASSHGGDQPQHF	TRBV3-1*01	TRBJ1-5*01
CASSFTGTGGELFF	TRBV11-2*01	TRBJ2-2*01
CASSQDWTGNGYTF	TRBV4-1*01	TRBJ1-2*01
CASSPRFAVPNYGYTF	TRBV4-3*01	TRBJ1-2*01
CASSQGGLAGLNEQFF	TRBV4-2*01	TRBJ2-1*01
CASSWTLALREETQYF	TRBV27*01	TRBJ2-5*01
CASSLGVVSGELFF	TRBV12-4*01	TRBJ2-2*01
CACRTGSEQFF	TRBV28*01	TRBJ2-1*01
CASSFGPQGTYEQYF	TRBV7-2*01	TRBJ2-7*01
CASLVGGTEAFF	TRBV6-1*01	TRBJ1-1*01
CASSPGTSGRAYNTGELFF	TRBV7-2*01	TRBJ2-2*01
CASSYGQGADEQYF	TRBV6-5*01	TRBJ2-7*01
CASSLSRKEQFF	TRBV4-2*01	TRBJ2-1*01
CASSSLLELYGYTF	TRBV7-9*01	TRBJ1-2*01
CASFWQGAADTQYF	TRBV6-1*01	TRBJ2-3*01
CASSPPWTPNYGYTF	TRBV7-8*01	TRBJ1-2*01
CASSLKGSNQPQHF	TRBV7-2*01	TRBJ1-5*01
CASRRERYTEAFF	TRBV4-2*01	TRBJ1-1*01
CASSSVLSPGQAFF	TRBV5-1*01	TRBJ1-1*01
CASSPRSAGAYNEQFF	TRBV4-3*01	TRBJ2-1*01
CASSYLRGAYTEAFF	TRBV27*01	TRBJ1-1*01
CASSLAGLARDTQYF	TRBV5-1*01	TRBJ2-3*01
CASSEAFQEGGQEDTQYF	TRBV2*01	TRBJ2-3*01
CASNRDRTLIEAFF	TRBV6-6*01	TRBJ1-1*01
CASSQPTGHSGANVLTF	TRBV4-1*01	TRBJ2-6*01
CASTPGVSYNEQFF	TRBV4-1*01	TRBJ2-1*01
CSATYFLAGGPWEQFF	TRBV20-1*01	TRBJ2-1*01
CASSPHPGGPQETQYF	TRBV9*01	TRBJ2-5*01
CASSPGANVLTF	TRBV6-6*01	TRBJ2-6*01
CASSDPTGGPSQPQHF	TRBV6-6*01	TRBJ1-5*01
CASRNERGPASYEQYF	TRBV12-4*01	TRBJ2-7*01
CAWSVAAGDYSNQPQHF	TRBV30*01	TRBJ1-5*01
CASSQGIYGYTF	TRBV3-1*01	TRBJ1-2*01
CASSLGAGLEETQYF	TRBV5-1*01	TRBJ2-5*01
CASSQGGEQYF	TRBV4-1*01	TRBJ2-7*01
CASSLVPTGGGPNTEAFF	TRBV7-9*01	TRBJ1-1*01
CASSHRQGTDEKLFF	TRBV4-1*01	TRBJ1-4*01
CSVDGGGSNQPQHF	TRBV29-1*01	TRBJ1-5*01
CASSPRPGQPSIDEKLFF	TRBV11-2*01	TRBJ1-4*01
CASSQDHYNEQFF	TRBV7-2*01	TRBJ2-1*01
CSARTGEDGQYF	TRBV20-1*01	TRBJ2-5*01
CASSFSSGGAGELFF	TRBV5-4*01	TRBJ2-2*01
CASSLVGVSQYF	TRBV11-2*01	TRBJ2-5*01
CASSQDIRTRGFHNEQFF	TRBV4-1*01	TRBJ2-1*01
CASSLTLAGAIVTSTDTQYF	TRBV7-2*01	TRBJ2-3*01
CASSWGLAVPGEQFF	TRBV7-6*01	TRBJ2-1*01
CASSTLSGGVGSPLHF	TRBV3-1*01	TRBJ1-6*01
CASSYADTGANVLTF	TRBV6-5*01	TRBJ2-6*01
CSVERGLHRAYNEQFF	TRBV29-1*01	TRBJ2-1*01
CASSAGTVGYEQYF	TRBV12-4*01	TRBJ2-7*01
CASSPEGVSYNSPLHF	TRBV28*01	TRBJ1-6*01
CASSGWGSGGTLYTDTQYF	TRBV12-4*01	TRBJ2-3*01
CASSQDFFNEQFF	TRBV4-3*01	TRBJ2-1*01
CASSPGTGTNTEAFF	TRBV7-9*01	TRBJ1-1*01
CASSVDGSAKNIQYF	TRBV9*01	TRBJ2-4*01
CASSQDLAGGRSGELFF	TRBV4-3*01	TRBJ2-2*01
CASSQDPGNQPQHF	TRBV3-1*01	TRBJ1-5*01
CASSAGSSYNEQFF	TRBV10-2*01	TRBJ2-1*01
CASSLARQGGRETQYF	TRBV5-6*01	TRBJ2-5*01
CASAGLAGDEQYF	TRBV12-4*01	TRBJ2-7*01
CSVVDRADYGYTF	TRBV29-1*01	TRBJ1-2*01
CASSQERTVVNGYTF	TRBV4-1*01	TRBJ1-2*01
CASSQDWTGDGYTF	TRBV4-1*01	TRBJ1-2*01
CASSSHVPGTEAFF	TRBV7-6*01	TRBJ1-1*01
CASSFSLGELFF	TRBV12-4*01	TRBJ2-2*01
CASSFGTRGEQYF	TRBV3-1*01	TRBJ2-7*01
CASSQGPASNYGYTF	TRBV4-1*01	TRBJ1-2*01
CASSPERGHNQPQHF	TRBV12-4*01	TRBJ1-5*01
CASSQGPGTDTQYF	TRBV4-1*01	TRBJ2-3*01
CASSVWWGRNNEQFF	TRBV2*01	TRBJ2-1*01
CSARFWDSNTEAFF	TRBV20-1*01	TRBJ1-1*01
CASSPPYRGPGNEQYF	TRBV18*01	TRBJ2-7*01
CSAKGLGGFQETQYF	TRBV20-1*01	TRBJ2-5*01
CASSYQGLRSSYNEQFF	TRBV28*01	TRBJ2-1*01
CSARAVPSGRITYNEQFF	TRBV20-1*01	TRBJ2-1*01
CASSPPLGATNEKLFF	TRBV6-1*01	TRBJ1-4*01
CASGGQGYEQYF	TRBV28*01	TRBJ2-7*01
CASSERRGQTYGQYF	TRBV7-6*01	TRBJ2-7*01
CASSLRGNEQFF	TRBV5-6*01	TRBJ2-1*01
CASSLSQGMYEQYF	TRBV7-8*01	TRBJ2-7*01
CASSPTGSGNTIYF	TRBV6-5*01	TRBJ1-3*01
CSARLGTEETQYF	TRBV20-1*01	TRBJ2-5*01
CASSLGLQGQIYGYTF	TRBV7-9*01	TRBJ1-2*01
CSVRQGARAFF	TRBV29-1*01	TRBJ1-1*01
CASSYTGGNEKLFF	TRBV6-6*01	TRBJ1-4*01
CSVVESGIAKNIQYF	TRBV29-1*01	TRBJ2-4*01
CASSLADARAF	TRBV7-9*01	TRBJ1-1*01
CASSFYRGGEKLFF	TRBV12-4*01	TRBJ1-4*01
CASRLFGTAEPQHF	TRBV27*01	TRBJ1-5*01
CASSWRKGFIYNEQFF	TRBV27*01	TRBJ2-1*01
CASSLGLANEQFF	TRBV11-3*01	TRBJ2-1*01
CASSLDSGRVNEQFF	TRBV5-4*01	TRBJ2-1*01
CASSYWTGGRYEQYF	TRBV27*01	TRBJ2-7*01
CASSDLPPNEKLFF	TRBV7-6*01	TRBJ1-4*01
CASSEHPMQGELFF	TRBV3-1*01	TRBJ2-2*01
CASSQVSGGQPQHF	TRBV4-1*01	TRBJ1-5*01
CASRYRGDEQFF	TRBV25-1*01	TRBJ2-1*01
CASSFAGGAGQETQYF	TRBV28*01	TRBJ2-5*01
CASNKDFRGDNEQFF	TRBV12-4*01	TRBJ2-1*01
CASSFQGSNYGYTF	TRBV12-4*01	TRBJ1-2*01
CASTDNFHLGTEAFF	TRBV6-5*01	TRBJ1-1*01
CASSPSTGTDTQYF	TRBV4-3*01	TRBJ2-3*01
CASSPSYSGANVLTF	TRBV3-1*01	TRBJ2-6*01
CASSLVATPGGYGYTF	TRBV7-2*01	TRBJ1-2*01
CASSQEGTGPGHDNEKLFF	TRBV4-3*01	TRBJ1-4*01
CARQGQLYGYTF	TRBV7-2*01	TRBJ1-2*01
CASSRGGRRDGYTF	TRBV27*01	TRBJ1-2*01
CASSLGGLAFFYEQYF	TRBV7-9*01	TRBJ2-7*01
CSVVVGEGQGAYEQYF	TRBV29-1*01	TRBJ2-7*01
CASSQEARGHTNEKLFF	TRBV4-1*01	TRBJ1-4*01
CASSFSGGGEQYF	TRBV27*01	TRBJ2-7*01
CASSYGPRQTQETQYF	TRBV6-6*01	TRBJ2-5*01
CASSYLGQNSPLHF	TRBV4-1*01	TRBJ1-6*01
CASSYGGGNYGYTF	TRBV6-5*01	TRBJ1-2*01
CASSDYNEQFF	TRBV5-1*01	TRBJ2-1*01
CASRREVGAYNEQFF	TRBV11-1*01	TRBJ2-1*01
CASSEEGRGKEADTQYF	TRBV25-1*01	TRBJ2-3*01
CASSPGQGARDIQYF	TRBV11-2*01	TRBJ2-4*01
CASSSPHLPPFF	TRBV27*01	TRBJ2-1*01
CASSPPTGEGETQYF	TRBV18*01	TRBJ2-5*01
CASRAQGAINEQYF	TRBV28*01	TRBJ2-7*01
CASSLRRIDDQPQHF	TRBV12-4*01	TRBJ1-5*01
CASSQEGFITEAFF	TRBV4-3*01	TRBJ1-1*01
CSAILGTGVGF	TRBV20-1*01	TRBJ1-4*01
CSARDLAGGYNEQYF	TRBV20-1*01	TRBJ2-7*01
CASSHGPTGDSPLHF	TRBV4-1*01	TRBJ1-6*01
CASSSLRRGNEKLFF	TRBV28*01	TRBJ1-4*01
CASSLLAGASYNEQFF	TRBV7-8*01	TRBJ2-1*01
CASSGYGGTDTDTQYF	TRBV9*01	TRBJ2-3*01
CASSQGPGSFNSPLHF	TRBV4-3*01	TRBJ1-6*01
CSAQPDGSGPQGETQYF	TRBV29-1*01	TRBJ2-5*01
CASSQDRSYEQYF	TRBV4-3*01	TRBJ2-7*01
CASSLFQAGGWDEQYF	TRBV28*01	TRBJ2-7*01
CASSSWTSRSTDTQYF	TRBV7-9*01	TRBJ2-3*01
CASSLLRGGVADTQYF	TRBV28*01	TRBJ2-3*01
CASSLDNQPQHF	TRBV7-9*01	TRBJ1-5*01
CASRGGASYGYTF	TRBV28*01	TRBJ1-2*01
CSVRVLKGGGANVLTF	TRBV29-1*01	TRBJ2-6*01
CSVRGLAENNEQFF	TRBV29-1*01	TRBJ2-1*01
CASSFEGRINYGYTF	TRBV7-9*01	TRBJ1-2*01
CASSLGYNEQFF	TRBV4-1*01	TRBJ2-1*01
CASSGGGILPYNEQFF	TRBV5-6*01	TRBJ2-1*01
CASSDGLKDTQYF	TRBV2*01	TRBJ2-3*01
CASSLGGAGNEQFF	TRBV7-6*01	TRBJ2-1*01
CASSFAVAGVNYEQYF	TRBV27*01	TRBJ2-7*01
CASSRTSGGTGELFF	TRBV7-9*01	TRBJ2-2*01
CSVVKGFNEQYF	TRBV29-1*01	TRBJ2-7*01
CASSLGGGAQPQHF	TRBV7-6*01	TRBJ1-5*01
CASSQDRGSTGELFF	TRBV4-2*01	TRBJ2-2*01
CASSLAPTGELFF	TRBV27*01	TRBJ2-2*01
CASRSPGQGPYEQYF	TRBV28*01	TRBJ2-7*01
CATSRDPGQPQHF	TRBV15*01	TRBJ1-5*01
CASSFGGTDTQYF	TRBV7-3*01	TRBJ2-3*01
CAISGTSGGAWDTQYF	TRBV10-3*01	TRBJ2-3*01
CASSPRGGETDTQYF	TRBV7-8*01	TRBJ2-3*01
CASGGWAGETQYF	TRBV6-5*01	TRBJ2-5*01
CASSPATGHTEAFF	TRBV4-1*01	TRBJ1-1*01
CASSPGTLYNEQFF	TRBV6-1*01	TRBJ2-1*01
CASSQYVDTQYF	TRBV7-6*01	TRBJ2-3*01
CASSYSTGPYEQYF	TRBV4-1*01	TRBJ2-7*01
CATSRPRTGDEQFF	TRBV15*01	TRBJ2-1*01
CASRPQGASNQPQHF	TRBV6-6*01	TRBJ1-5*01
CASSTRLTSGGAPEQFF	TRBV9*01	TRBJ2-1*01
CSARDIGSELNGQYF	TRBV20-1*01	TRBJ2-7*01
CSVEDSGGAVGTDTQYF	TRBV29-1*01	TRBJ2-3*01
CASSLGDSYEQYF	TRBV28*01	TRBJ2-7*01
CASSLLGGEQYF	TRBV12-4*01	TRBJ2-7*01
CASSPGNQPQHF	TRBV12-4*01	TRBJ1-5*01
CASSLEGRLQPQHF	TRBV12-4*01	TRBJ1-5*01
CATTAGENTEAFF	TRBV2*01	TRBJ1-1*01
CASSQDPSNTEAFF	TRBV4-1*01	TRBJ1-1*01
CASSTTGSNEKLFF	TRBV7-9*01	TRBJ1-4*01
CSVGWGNTIYF	TRBV29-1*01	TRBJ1-3*01
CASSQSGVLDGYTF	TRBV3-1*01	TRBJ1-2*01
CASSLGMDRGTYGYTF	TRBV13*01	TRBJ1-2*01
CAISESDRGTRLFF	TRBV10-3*01	TRBJ1-4*01
CASSLNSGAKNIQYF	TRBV12-4*01	TRBJ2-4*01
CATSRERVGDTQYF	TRBV15*01	TRBJ2-3*01
CASSPSGGELFF	TRBV12-4*01	TRBJ2-2*01
CASSESDLNTEAFF	TRBV7-2*01	TRBJ1-1*01
CASSWTGVREQYF	TRBV28*01	TRBJ2-7*01
CASSQDPQGYEQYF	TRBV4-1*01	TRBJ2-7*01
CASSLEGQNTEAFF	TRBV12-4*01	TRBJ1-1*01
CATRDRVSYEQYF	TRBV24-1*01	TRBJ2-7*01
CASSLDGNTQYF	TRBV7-2*01	TRBJ2-3*01
CASRSGTGILYEQYF	TRBV12-4*01	TRBJ2-7*01
CASSQDIGPKGTEAFF	TRBV3-1*01	TRBJ1-1*01
CASSLGWSTDTQYF	TRBV7-2*01	TRBJ2-3*01
CASSQGWGYEQYF	TRBV4-1*01	TRBJ2-7*01
CSAREYSEAFF	TRBV20-1*01	TRBJ1-1*01
CSAWTGHGYTF	TRBV20-1*01	TRBJ1-2*01
CASSPLASYNEQFF	TRBV4-3*01	TRBJ2-1*01
CAISEPERIYEQYF	TRBV10-3*01	TRBJ2-7*01
CASRSTDTQYF	TRBV27*01	TRBJ2-3*01
CSVLGTDTEAFF	TRBV29-1*01	TRBJ1-1*01
CASSQGPDRFYEQYF	TRBV4-1*01	TRBJ2-7*01
CASSRQSSLPDEQFF	TRBV7-8*01	TRBJ2-1*01
CASSLTGLETQYF	TRBV7-9*01	TRBJ2-5*01
CASSEAAGGVQETQYF	TRBV27*01	TRBJ2-5*01
CATQDIKEDTQYF	TRBV24-1*01	TRBJ2-3*01
CASSQDGNTQYF	TRBV4-1*01	TRBJ2-3*01
CATRLAGQETQYF	TRBV24-1*01	TRBJ2-5*01
CASSLGSLYEQYF	TRBV12-4*01	TRBJ2-7*01
CASSFDPSLINQPQHF	TRBV7-7*01	TRBJ1-5*01
CASRSPYTLEQYF	TRBV28*01	TRBJ2-7*01
CASRDRGGGANVLTF	TRBV7-2*01	TRBJ2-6*01
CASSHPGQGAAGNTIYF	TRBV2*01	TRBJ1-3*01
CASSTRGLADEQFF	TRBV9*01	TRBJ2-1*01
CASSSRRIPAGEKLFF	TRBV12-4*01	TRBJ1-4*01
CASSPTLGGQETQYF	TRBV7-9*01	TRBJ2-5*01
CASSSMGLAGVDEQFF	TRBV27*01	TRBJ2-1*01
CASSDYNSPLHF	TRBV12-4*01	TRBJ1-6*01
CASSSPTSGGGNEQFF	TRBV28*01	TRBJ2-1*01
CASSTGTGRTDTQYF	TRBV12-4*01	TRBJ2-3*01
CASSQTLTGELFF	TRBV4-1*01	TRBJ2-2*01
CASSQVGGSPLHF	TRBV4-1*01	TRBJ1-6*01
CASSGRTGVDQPQHF	TRBV25-1*01	TRBJ1-5*01
CASSFGDPRVQYF	TRBV5-1*01	TRBJ2-4*01
CASSPAQGGSSTEAFF	TRBV18*01	TRBJ1-1*01
CASSGGFSGNTIYF	TRBV27*01	TRBJ1-3*01
CASEKRGLYNEQFF	TRBV6-1*01	TRBJ2-1*01
CASGLNSNQPQHF	TRBV12-5*01	TRBJ1-5*01
CASSRGTRQETQYF	TRBV4-1*01	TRBJ2-5*01
CASSPPSSGRQDTQYF	TRBV18*01	TRBJ2-3*01
CASSLDDDRDTQYF	TRBV11-2*01	TRBJ2-3*01
CASSPGQGNSPLHF	TRBV4-1*01	TRBJ1-6*01
CATLGGDGYTF	TRBV27*01	TRBJ1-2*01
CASSQDPSTYEQYF	TRBV4-1*01	TRBJ2-7*01
CASRTGQGGNNEQFF	TRBV28*01	TRBJ2-1*01
CASSQDPRGPNTGELFF	TRBV4-1*01	TRBJ2-2*01
CASSQDLTSGANVLTF	TRBV4-3*01	TRBJ2-6*01
CSVARGQPPYEQYF	TRBV29-1*01	TRBJ2-7*01
CSVGPGDSNQPQHF	TRBV29-1*01	TRBJ1-5*01
CSARSGGTNTEAFF	TRBV20-1*01	TRBJ1-1*01
CASTPASSTDTQYF	TRBV12-4*01	TRBJ2-3*01
CASSLAQDEQYF	TRBV7-6*01	TRBJ2-7*01
CASSRGQAGGTYEQYF	TRBV27*01	TRBJ2-7*01
CASSPRPGLAGGLAKNIQYF	TRBV7-2*01	TRBJ2-4*01
CASIKTGGVEAFF	TRBV6-1*01	TRBJ1-1*01
CASSQDQGMSTDTQYF	TRBV3-1*01	TRBJ2-3*01
CASSQDLIWAEKLFF	TRBV4-2*01	TRBJ1-4*01
CSVESRERTYEQYF	TRBV29-1*01	TRBJ2-7*01
CASSLTSGGAGDTQYF	TRBV5-1*01	TRBJ2-3*01
CASSPGGVHGYTF	TRBV6-5*01	TRBJ1-2*01
CASSLRQGEVGELFF	TRBV12-4*01	TRBJ2-2*01
CASSYGWAGYTGELFF	TRBV6-1*01	TRBJ2-2*01
CSARVKLAGDTDTQYF	TRBV20-1*01	TRBJ2-3*01
CASRPFAGNEQFF	TRBV2*01	TRBJ2-1*01
CASSPLTLQGRPQHF	TRBV6-1*01	TRBJ1-5*01
CATNSGGAYEQFF	TRBV6-6*01	TRBJ2-1*01
CSARDTGLWVEQYF	TRBV20-1*01	TRBJ2-7*01
CASIPAPGTGNTEAFF	TRBV28*01	TRBJ1-1*01
CASSPRTGNGEAFF	TRBV28*01	TRBJ1-1*01
CASSLSRGNEQFF	TRBV5-1*01	TRBJ2-1*01
CASSLGTASTDTQYF	TRBV5-6*01	TRBJ2-3*01
CASSRNPDLGGAFF	TRBV5-1*01	TRBJ1-1*01
CASKGKSAHTEAFF	TRBV6-1*01	TRBJ1-1*01
CASSIDILSGANVLTF	TRBV4-3*01	TRBJ2-6*01
CASSLETPGSKGSPLHF	TRBV4-2*01	TRBJ1-6*01
CASSRSDRVSGELFF	TRBV28*01	TRBJ2-2*01
CASSVGVRGYTF	TRBV9*01	TRBJ1-2*01
CASSPDPSEYNEQFF	TRBV4-1*01	TRBJ2-1*01
CSVGSSARGWWEQYF	TRBV29-1*01	TRBJ2-7*01
CATQQWGTNTEAFF	TRBV27*01	TRBJ1-1*01
CSVVSYQETQYF	TRBV29-1*01	TRBJ2-5*01
CSASTGNQPQHF	TRBV20-1*01	TRBJ1-5*01
CANRGSGNHYNEQFF	TRBV2*01	TRBJ2-1*01
CASSLGGWAGRTYEQYF	TRBV28*01	TRBJ2-7*01
CSVEGQGELFF	TRBV29-1*01	TRBJ2-2*01
CASSQEGGPYYGYTF	TRBV4-1*01	TRBJ1-2*01
CASRRVTDTQYF	TRBV7-9*01	TRBJ2-3*01
CASSEAGGTDHNTEAFF	TRBV25-1*01	TRBJ1-1*01
CASSRPRNEQFF	TRBV6-6*01	TRBJ2-1*01
CSVVWTSVVGEQFF	TRBV29-1*01	TRBJ2-1*01
CSASGGGAYEQYF	TRBV20-1*01	TRBJ2-7*01
CSAGETRTEAFF	TRBV20-1*01	TRBJ1-1*01
CSATSVNEQFF	TRBV20-1*01	TRBJ2-1*01
CASSPPGEQYF	TRBV6-1*01	TRBJ2-7*01
CASSSGRGWEQYF	TRBV27*01	TRBJ2-7*01
CASSPGPYNEQFF	TRBV4-3*01	TRBJ2-1*01
CATSDSQGGVNTEAFF	TRBV24-1*01	TRBJ1-1*01
CASTGRNSGNTIYF	TRBV28*01	TRBJ1-3*01
CASRTGTDTQYF	TRBV27*01	TRBJ2-3*01
CSVGDGDQPQHF	TRBV29-1*01	TRBJ1-5*01
CASSSLADLGYGYTF	TRBV12-4*01	TRBJ1-2*01
CSAVTSTNIQYF	TRBV29-1*01	TRBJ2-4*01
CASSQERSGSGNTIYF	TRBV4-3*01	TRBJ1-3*01
CSATRTGGELFF	TRBV29-1*01	TRBJ2-2*01
CASSYGGGYQENTEAFF	TRBV6-9*01	TRBJ1-1*01
CSASAGTGNGYTF	TRBV20-1*01	TRBJ1-2*01
CSVPREFRNEQFF	TRBV29-1*01	TRBJ2-1*01
CASSYTQPGTGELFF	TRBV6-1*01	TRBJ2-2*01
CASSQDVRQGSYEQYF	TRBV4-3*01	TRBJ2-7*01
CASSSTTFPGQGSLGGQETQYF	TRBV28*01	TRBJ2-5*01
CASSQEAGIESPLHF	TRBV4-1*01	TRBJ1-6*01
CASSHGRPGPARDTQYF	TRBV7-2*01	TRBJ2-3*01
CASSLGDGLFEQYF	TRBV7-2*01	TRBJ2-7*01
CASSQDENANTEAFF	TRBV4-3*01	TRBJ1-1*01
CASSLTSQGAYEQYF	TRBV13*01	TRBJ2-7*01
CASSQDSREKLFF	TRBV4-1*01	TRBJ1-4*01
CSVDTGGYTEAFF	TRBV29-1*01	TRBJ1-1*01
CASSQEASGGAKDNEQFF	TRBV4-3*01	TRBJ2-1*01
CASSPYPTGGRSVGELFF	TRBV7-3*01	TRBJ2-2*01
CASSQDPGTREQYF	TRBV4-1*01	TRBJ2-7*01
CSAQDGISYEQYF	TRBV29-1*01	TRBJ2-7*01
CASSQNGYEQFF	TRBV7-6*01	TRBJ2-1*01
CASSSWAAATEAFF	TRBV7-2*01	TRBJ1-1*01
CASRGDSSGRTDTQYF	TRBV6-1*01	TRBJ2-3*01
CASSLALASNQPQHF	TRBV7-2*01	TRBJ1-5*01
CASTLGTASTYEQYF	TRBV2*01	TRBJ2-7*01
CASSLSPLTSASTDTQYF	TRBV5-1*01	TRBJ2-3*01
CASSPGTGFYEQYF	TRBV7-8*01	TRBJ2-7*01
CASSFLSSYNEQFF	TRBV12-4*01	TRBJ2-1*01
CASSSVDEQYF	TRBV28*01	TRBJ2-7*01
CASSLARWAGLFTDTQYF	TRBV7-2*01	TRBJ2-3*01
CASSFSPGPHEQYF	TRBV7-2*01	TRBJ2-7*01
CSARHLQGALTDTQYF	TRBV20-1*01	TRBJ2-3*01
CSVDGNSGTDTQYF	TRBV29-1*01	TRBJ2-3*01
CASSLYLNTEAFF	TRBV13*01	TRBJ1-1*01
CSGRTSGSYEQYF	TRBV29-1*01	TRBJ2-7*01
CASSQDGRSGNTIYF	TRBV4-1*01	TRBJ1-3*01
CASSPWTGKSGNTIYF	TRBV27*01	TRBJ1-3*01
CASSLVIGETQYF	TRBV7-9*01	TRBJ2-5*01
CAISEPGNQPQHF	TRBV10-3*01	TRBJ1-5*01
CASSPDRFYEQYF	TRBV7-2*01	TRBJ2-7*01
CASSLSSNTEAFF	TRBV27*01	TRBJ1-1*01
CASSLGLSLDF	TRBV7-8*01	TRBJ2-3*01
CASVGGQGAVQPQHF	TRBV6-6*01	TRBJ1-5*01
CASSEHAGANVLTF	TRBV5-4*01	TRBJ2-6*01
CASKGTSGGRETQYF	TRBV2*01	TRBJ2-5*01
CASTLGPWSNQPQHF	TRBV7-8*01	TRBJ1-5*01
CASSHGPGNQETQYF	TRBV7-9*01	TRBJ2-5*01
CASSLASLLGQASSYEQYF	TRBV28*01	TRBJ2-7*01
CASSLDRGGGYTF	TRBV6-1*01	TRBJ1-2*01
CASRDRGSNTEAFF	TRBV5-1*01	TRBJ1-1*01
CASREDSGLADTQYF	TRBV19*01	TRBJ2-3*01
CASSPRGGGELFF	TRBV7-9*01	TRBJ2-2*01
CASSQDLAGNTIYF	TRBV4-3*01	TRBJ1-3*01
CASSGSAGSTDTQYF	TRBV5-4*01	TRBJ2-3*01
CASSQVAGEAFF	TRBV3-1*01	TRBJ1-1*01
CASGPGTSGTYTGELFF	TRBV7-9*01	TRBJ2-2*01
CASSFQETQYF	TRBV12-4*01	TRBJ2-5*01
CASSLSVWVIGNEQFF	TRBV27*01	TRBJ2-1*01
CASSQRPAYEQYF	TRBV4-1*01	TRBJ2-7*01
CASSNRGTPYSYEQYF	TRBV6-5*01	TRBJ2-7*01
CASSLRDISYEQYF	TRBV28*01	TRBJ2-7*01
CASSPDTALGTGELFF	TRBV18*01	TRBJ2-2*01
CSVDTRGEQYF	TRBV29-1*01	TRBJ2-7*01
CASSPVVDEQYF	TRBV28*01	TRBJ2-7*01
CASSLEQSPLNF	TRBV11-2*01	TRBJ1-6*01
CASSGGLADNEQFF	TRBV7-8*01	TRBJ2-1*01
CSPIKSTNTEAFF	TRBV29-1*01	TRBJ1-1*01
CASSVELGLSTGELFF	TRBV9*01	TRBJ2-2*01
CSARGTSGGYQETQYF	TRBV20-1*01	TRBJ2-5*01
CASSREGGTEAFF	TRBV2*01	TRBJ1-1*01
CSAVGPRYENTEAFF	TRBV20-1*01	TRBJ1-1*01
CSVEDRGHTGELFF	TRBV29-1*01	TRBJ2-2*01
CASSLPDRLNTEAFF	TRBV28*01	TRBJ1-1*01
CASSYGRVTQPQHF	TRBV6-1*01	TRBJ1-5*01
CASSQGWAGQGSSGYTF	TRBV3-1*01	TRBJ1-2*01
CASSSPRWGAKGSTGELFF	TRBV28*01	TRBJ2-2*01
CASSSSPYNEQFF	TRBV11-3*01	TRBJ2-1*01
CASSSRTVNNEQFF	TRBV5-4*01	TRBJ2-1*01
CASSNIEWTTGELFF	TRBV11-2*01	TRBJ2-2*01
CASSQDLSGNTIYF	TRBV4-1*01	TRBJ1-3*01
CASRSGTSGADTQYF	TRBV6-1*01	TRBJ2-3*01
CASSLGTFADTQYF	TRBV3-1*01	TRBJ2-3*01
CASSLAQGVYEQYF	TRBV27*01	TRBJ2-7*01
CASKIVSGSYEQYF	TRBV19*01	TRBJ2-7*01
CASSLYPEQFF	TRBV11-2*01	TRBJ2-1*01
CATPGLRIGEQYF	TRBV11-2*01	TRBJ2-7*01
CSARDVARLTGELFF	TRBV20-1*01	TRBJ2-2*01
CASRLTGGSFLNTEAFF	TRBV11-2*01	TRBJ1-1*01
CASSYDRSGAYEQYF	TRBV27*01	TRBJ2-7*01
CASSLSFGSSYEQYF	TRBV5-1*01	TRBJ2-7*01
CSSQVVGNQPQHF	TRBV20-1*01	TRBJ1-5*01
CSVSRNTGELFF	TRBV29-1*01	TRBJ2-2*01
CASSLGAGRIYGYTF	TRBV27*01	TRBJ1-2*01
CASGTVSMQPQHF	TRBV12-5*01	TRBJ1-5*01
CASSYGGGGGDTGELFF	TRBV27*01	TRBJ2-2*01
CASTFSSTGQETQYF	TRBV4-1*01	TRBJ2-5*01
CASSQELRGGYEQYF	TRBV4-3*01	TRBJ2-7*01
CASSPGPTNYGYTF	TRBV4-3*01	TRBJ1-2*01
CASSPGTSGGLPNTGELFF	TRBV7-2*01	TRBJ2-2*01
CASSPTGAGANVLTF	TRBV27*01	TRBJ2-6*01
CASSLAWGQEQFF	TRBV12-4*01	TRBJ2-1*01
CASSLVEGTPQETQYF	TRBV7-2*01	TRBJ2-5*01
CASSPGDRQSGELFF	TRBV7-6*01	TRBJ2-2*01
CAWTPGGGPYNEQFF	TRBV30*01	TRBJ2-1*01
CSVINRDFYGYTF	TRBV29-1*01	TRBJ1-2*01
CASSHRGTGSYEQYF	TRBV4-2*01	TRBJ2-7*01
CASRPGTGGVANTGELFF	TRBV12-4*01	TRBJ2-2*01
CAIRGPFSGANVLTF	TRBV10-3*01	TRBJ2-6*01
CASSFLASSYNEQFF	TRBV7-2*01	TRBJ2-1*01
CAVGPAGGLDTQYF	TRBV6-5*01	TRBJ2-3*01
CASSPDRENYEQYF	TRBV5-1*01	TRBJ2-7*01
CASSLAGGSSYEQYF	TRBV12-4*01	TRBJ2-7*01
CASSLSWGQPQHF	TRBV12-4*01	TRBJ1-5*01
CASSLAGTGGLGYTF	TRBV7-2*01	TRBJ1-2*01
CSVDNGSGTEAFF	TRBV29-1*01	TRBJ1-1*01
CASSPTVSGANVLTF	TRBV7-6*01	TRBJ2-6*01
CASGLPSSGANVLTF	TRBV12-5*01	TRBJ2-6*01
CASSVNRGPTDTQYF	TRBV7-2*01	TRBJ2-3*01
CASSLGQASTDTQYF	TRBV11-2*01	TRBJ2-3*01
CASSLTTGHNGYTF	TRBV12-4*01	TRBJ1-2*01
CSVATGGNSPLHF	TRBV29-1*01	TRBJ1-6*01
CASSKGVANQPQHF	TRBV27*01	TRBJ1-5*01
CASSPTGLNEKLFF	TRBV6-5*01	TRBJ1-4*01
CASSSHTNYGYTF	TRBV7-6*01	TRBJ1-2*01
CASSQEGWEQYF	TRBV4-1*01	TRBJ2-7*01
CASSQDPKASSEKLFF	TRBV4-1*01	TRBJ1-4*01
CASSFGDMRADTQYF	TRBV7-2*01	TRBJ2-3*01
CASSLTGGNTEAFF	TRBV7-8*01	TRBJ1-1*01
CASSSTGRLPTGELFF	TRBV27*01	TRBJ2-2*01
CASRDSLNTEAFF	TRBV27*01	TRBJ1-1*01
CSANPPGPAADTQYF	TRBV29-1*01	TRBJ2-3*01
CASSSTTTRTYEQYF	TRBV7-2*01	TRBJ2-7*01
CASSPWERTLNYEQYF	TRBV18*01	TRBJ2-7*01
CATRFGNTEAFF	TRBV2*01	TRBJ1-1*01
CASSYSTGELFF	TRBV6-1*01	TRBJ2-2*01
CSANDRGLWSYNEQFF	TRBV20-1*01	TRBJ2-1*01
CATLLLSGGNEQFF	TRBV13*01	TRBJ2-1*01
CASSGFGFTEAFF	TRBV2*01	TRBJ1-1*01
CASSKGGLTGGAHQPQHF	TRBV21-1*01	TRBJ1-5*01
CASSRGGQVTGELFF	TRBV7-9*01	TRBJ2-2*01
CSAPRGGSRFNQPQHF	TRBV20-1*01	TRBJ1-5*01
CASSLADGRYTEAFF	TRBV28*01	TRBJ1-1*01
CASSPDRRTYEQYF	TRBV5-4*01	TRBJ2-7*01
CASSPRGNTGELFF	TRBV28*01	TRBJ2-2*01
CASSSLPDTQYF	TRBV28*01	TRBJ2-3*01
CASSRDRLGETQYF	TRBV12-4*01	TRBJ2-5*01
CASSSTGGSSYEQYF	TRBV5-6*01	TRBJ2-7*01
CASSFAAGQSYEQYF	TRBV7-8*01	TRBJ2-7*01
CASSRDRAEKLFF	TRBV7-2*01	TRBJ1-4*01
CASSRGQIQETQYF	TRBV4-1*01	TRBJ2-5*01
CATSVSFPPGELFF	TRBV24-1*01	TRBJ2-2*01
CASSWTRTDTGELFF	TRBV6-5*01	TRBJ2-2*01
CASSLNLLGNTIYF	TRBV5-6*01	TRBJ1-3*01
CSASGRRAYGAGELFF	TRBV20-1*01	TRBJ2-2*01
CASSPGFSPFYGYTF	TRBV7-2*01	TRBJ1-2*01
CATRQGWNLANTGELFF	TRBV2*01	TRBJ2-2*01
CASSPGGGRSYNEQFF	TRBV11-3*01	TRBJ2-1*01
CASSQGQGGQPQHF	TRBV4-1*01	TRBJ1-5*01
CASSLAGSGEQYF	TRBV9*01	TRBJ2-7*01
CATSDNVEAGQYF	TRBV24-1*01	TRBJ2-7*01
CASSFTNSYNSPLHF	TRBV7-3*01	TRBJ1-6*01
CSASRERTSGGAAYEQYF	TRBV20-1*01	TRBJ2-7*01
CSSTGAGEQYF	TRBV29-1*01	TRBJ2-7*01
CASGRDSFYNEQFF	TRBV12-5*01	TRBJ2-1*01
CASSQDLRQVNEKLFF	TRBV4-1*01	TRBJ1-4*01
CSVTETSSYNEQFF	TRBV29-1*01	TRBJ2-1*01
CASSLAKRITDTQYF	TRBV5-1*01	TRBJ2-3*01
CASSQDHRINEKLFF	TRBV4-1*01	TRBJ1-4*01
CASSQDPAQETQYF	TRBV4-1*01	TRBJ2-5*01
CASSLASSRFF	TRBV28*01	TRBJ2-1*01
CASSDRGTEAFF	TRBV28*01	TRBJ1-1*01
CASSLLRASEQFF	TRBV7-2*01	TRBJ2-1*01
CASSQNSNTEAFF	TRBV4-2*01	TRBJ1-1*01
CASSQDLGISEQYF	TRBV4-1*01	TRBJ2-7*01
CASNTGGRAGELFF	TRBV28*01	TRBJ2-2*01
CASSHNVRGTEAFF	TRBV4-1*01	TRBJ1-1*01
CASSLNLGPNQPQHF	TRBV27*01	TRBJ1-5*01
CASSVHYLRGNIQYF	TRBV7-9*01	TRBJ2-4*01
CASSQDPGRYEQFF	TRBV4-1*01	TRBJ2-1*01
CASRGAGASYEQYF	TRBV12-5*01	TRBJ2-7*01
CASSIFSGAQETQYF	TRBV5-1*01	TRBJ2-5*01
CASSQDLAGGGEKLFF	TRBV4-3*01	TRBJ1-4*01
CASSPARGSEAFF	TRBV5-4*01	TRBJ1-1*01
CASSSIGTGFEQYF	TRBV7-9*01	TRBJ2-7*01
CSARDPAEAFF	TRBV20-1*01	TRBJ1-1*01
CASSLGGPYTGELFF	TRBV27*01	TRBJ2-2*01
CASSQDWLARAGELFF	TRBV4-3*01	TRBJ2-2*01
CASSQPMGSYEQYF	TRBV3-1*01	TRBJ2-7*01
CASSGQGLDTIYF	TRBV6-5*01	TRBJ1-3*01
CASSWGTSSTDTQYF	TRBV27*01	TRBJ2-3*01
CASRKRGGRDTGELFF	TRBV6-1*01	TRBJ2-2*01
CSALAGPYEQYF	TRBV20-1*01	TRBJ2-7*01
CSVRYGSSNQPQHF	TRBV29-1*01	TRBJ1-5*01
CASSPDRETSTEAFF	TRBV27*01	TRBJ1-1*01
CASSPGTSGSLSDSTDTQYF	TRBV5-1*01	TRBJ2-3*01
CASTRGSGELFF	TRBV9*01	TRBJ2-2*01
CATSDEPPEGIPYNEQFF	TRBV24-1*01	TRBJ2-1*01
CASSFPGLYGYTF	TRBV12-4*01	TRBJ1-2*01
CASSLGLDYGYTF	TRBV5-5*01	TRBJ1-2*01
CSARDPYSYEQYF	TRBV20-1*01	TRBJ2-7*01
CASSQKYPGGEQYF	TRBV4-2*01	TRBJ2-7*01
CASSPRGQGAGDTQYF	TRBV4-3*01	TRBJ2-3*01
CAGEPGDEKLFF	TRBV20-1*01	TRBJ1-4*01
CAISDPTIVAKNIQYF	TRBV10-3*01	TRBJ2-4*01
CASSQGLAGLQDEQFF	TRBV4-3*01	TRBJ2-1*01
CASSQELLNSPLHF	TRBV4-1*01	TRBJ1-6*01
CASSADSSVINYGYTF	TRBV2*01	TRBJ1-2*01
CASSSYPSGVAKNIQYF	TRBV12-4*01	TRBJ2-4*01
CASSLLTDTQYF	TRBV5-6*01	TRBJ2-3*01
CASSQGLGTPGQYF	TRBV4-3*01	TRBJ2-3*01
CASSPPASTEAFF	TRBV5-1*01	TRBJ1-1*01
CSVEGGTLVETQYF	TRBV29-1*01	TRBJ2-5*01
CATSLQGALGEAFF	TRBV24-1*01	TRBJ1-1*01
CASRRNTEAFF	TRBV27*01	TRBJ1-1*01
CASSPYQPQHF	TRBV6-7*01	TRBJ1-5*01
CASSLSGGGEQFF	TRBV7-2*01	TRBJ2-1*01
CASSLGQHSGNTIYF	TRBV7-2*01	TRBJ1-3*01
CASRAGIYQPQHF	TRBV12-4*01	TRBJ1-5*01
CASSQDPLTEAFF	TRBV3-1*01	TRBJ1-1*01
CSAPGLAGGDTQYF	TRBV20-1*01	TRBJ2-3*01
CASSSPGRRVGQPQHF	TRBV5-6*01	TRBJ1-5*01
CASSLGNEQFF	TRBV27*01	TRBJ2-1*01
CASSLVGGLSNPYNEQFF	TRBV7-8*01	TRBJ2-1*01
CASSQLATGELFF	TRBV4-3*01	TRBJ2-2*01
CASSQEGAEPYGYTF	TRBV3-1*01	TRBJ1-2*01
CASSLGPEPATPQHF	TRBV7-8*01	TRBJ1-5*01
CASSVDRGNEQFF	TRBV9*01	TRBJ2-1*01
CASSFGRVSTEAFF	TRBV27*01	TRBJ1-1*01
CASSQGQGSTEAFF	TRBV4-1*01	TRBJ1-1*01
CASSSHPDSSYEQYF	TRBV27*01	TRBJ2-7*01
CASRTGFETQYF	TRBV28*01	TRBJ2-5*01
CATAGLATDTQYF	TRBV4-1*01	TRBJ2-3*01
CASSHGTDTQYF	TRBV5-1*01	TRBJ2-3*01
CASSQGPVPTDTQYF	TRBV4-1*01	TRBJ2-3*01
CASSYGGEQFF	TRBV6-5*01	TRBJ2-1*01
CASSQATIAGGTDTQYF	TRBV4-2*01	TRBJ2-3*01
CASSQADRVEVDTQYF	TRBV4-2*01	TRBJ2-3*01
CASSFPPGGQSTDTQYF	TRBV11-2*01	TRBJ2-3*01
CASRYSGGRYEQFF	TRBV5-4*01	TRBJ2-1*01
CASSQAWTGLDEQYF	TRBV4-1*01	TRBJ2-7*01
CATSDPLGERGDTGELFF	TRBV24-1*01	TRBJ2-2*01
CASSERTSGIPTDTQYF	TRBV9*01	TRBJ2-3*01
CASSSPGQGYEQYF	TRBV11-2*01	TRBJ2-7*01
CASSESLSGNIQYF	TRBV25-1*01	TRBJ2-4*01
CASSRGLAATYEQYF	TRBV28*01	TRBJ2-7*01
CSAGGGDGNQPQHF	TRBV20-1*01	TRBJ1-5*01
CSVGGTAQETQYF	TRBV29-1*01	TRBJ2-5*01
CSVALDEKLFF	TRBV29-1*01	TRBJ1-4*01
CASSITLLQAFF	TRBV7-8*01	TRBJ1-1*01
CSAGSPGLAVFSYNEQFF	TRBV20-1*01	TRBJ2-1*01
CASSPSSGREQFF	TRBV7-8*01	TRBJ2-1*01
CSARARDRYYEQYF	TRBV20-1*01	TRBJ2-7*01
CATQARNTGELFF	TRBV24-1*01	TRBJ2-2*01
CASSQTVTSTDTQYF	TRBV4-1*01	TRBJ2-3*01
CASTSPGGREKLFF	TRBV6-5*01	TRBJ1-4*01
CASSWGPDPNQPQHF	TRBV4-1*01	TRBJ1-5*01
CASSEVGEQFF	TRBV2*01	TRBJ2-1*01
CASSLNTGELFF	TRBV27*01	TRBJ2-2*01
CASSQDERGAADTQYF	TRBV3-1*01	TRBJ2-3*01
CASSFGPGTEAFF	TRBV12-4*01	TRBJ1-1*01
CASSFGTGREKLFF	TRBV12-4*01	TRBJ1-4*01
CASSPLTSGGYNEQFF	TRBV4-2*01	TRBJ2-1*01
CASSYRGFEAFF	TRBV5-4*01	TRBJ1-1*01
CASSNGTGPQYF	TRBV21-1*01	TRBJ2-5*01
CASSLLAALGEQYF	TRBV11-2*01	TRBJ2-7*01
CASSLGQFTDTQYF	TRBV11-2*01	TRBJ2-3*01
CASSSYGQGDQPQHF	TRBV7-2*01	TRBJ1-5*01
CASSQSLGARRSRGGISPQHF	TRBV23-1*01	TRBJ1-5*01
CASSFSGASTDTQYF	TRBV11-2*01	TRBJ2-3*01
CASTPGQAYREQYF	TRBV4-1*01	TRBJ2-7*01
CASSPTGAQQYF	TRBV11-1*01	TRBJ2-3*01
CASGLGPTEAFF	TRBV12-5*01	TRBJ1-1*01
CASSEDSRVSSSGANVLTF	TRBV2*01	TRBJ2-6*01
CASSTGRYYEQYF	TRBV6-1*01	TRBJ2-7*01
CSARHQTGGSGQPQHF	TRBV20-1*01	TRBJ1-5*01
CASSRTGVSYEQYF	TRBV7-6*01	TRBJ2-7*01
CSVEQGLTGELFF	TRBV29-1*01	TRBJ2-2*01
CSVGSGEQFF	TRBV29-1*01	TRBJ2-1*01
CASSYSTGRNEKLFF	TRBV6-5*01	TRBJ1-4*01
CSATDRGGRTHNEQFF	TRBV20-1*01	TRBJ2-1*01
CASSLAGELFF	TRBV6-1*01	TRBJ2-2*01
CASSPLSGYSNQPQHF	TRBV9*01	TRBJ1-5*01
CATSPGPGGTEAFF	TRBV15*01	TRBJ1-1*01
CASSLRGQGKNTGELFF	TRBV7-3*01	TRBJ2-2*01
CASLRGLAGVNEQFF	TRBV6-1*01	TRBJ2-1*01
CASSSQYEQYF	TRBV28*01	TRBJ2-7*01
CASSPGGVNEQFF	TRBV18*01	TRBJ2-1*01
CASSWGQNTGELFF	TRBV7-9*01	TRBJ2-2*01
CASSLWTGGSDQPQHF	TRBV28*01	TRBJ1-5*01
CASSLVADTTGELFF	TRBV5-6*01	TRBJ2-2*01
CATSRPEGANQPQHF	TRBV15*01	TRBJ1-5*01
CASSSPTSGYEQYF	TRBV6-5*01	TRBJ2-7*01
CSVDRGLEAFF	TRBV29-1*01	TRBJ1-1*01
CASSDRGYGYEQYF	TRBV25-1*01	TRBJ2-7*01
CASSHGGSASQETQYF	TRBV3-1*01	TRBJ2-5*01
CASSPQGVTEAFF	TRBV7-2*01	TRBJ1-1*01
CSAAGTDNSPLHF	TRBV20-1*01	TRBJ1-6*01
CASSDTQYSTEAFF	TRBV28*01	TRBJ1-1*01
[truncated: 20 more rows]
