# Supplementary material for: The clonal structure and dynamics of the human T cell response to an organic chemical hapten
Source: eLife. 2021 Jan 12;10:e54747. doi: 10.7554/eLife.54747 (PMC7880692; doi:10.7554/eLife.54747)
Supplement: Figure 7—source data 2. — The list of TCRs which is used as the control set to generate the DBN which is illustrated in Figure 7. Each row contains a unique combination of CDR3 sequence, V gene, and J gene annotation. [file elife-54747-fig7-data2.csv]

CDR3	V	J
CASSGTSDTDTQYF	TRBV6-1*01	TRBJ2-3*01
CASSLTGVSSYNEQFF	TRBV7-9*01	TRBJ2-1*01
CAILPGLAGIQYF	TRBV9*01	TRBJ2-7*01
CASSQEQGLAGLGEQFF	TRBV4-1*01	TRBJ2-1*01
CASSGSGDQPQHF	TRBV12-4*01	TRBJ1-5*01
CSARRQGIFYEQYF	TRBV20-1*01	TRBJ2-7*01
CASSFHQLYEQYF	TRBV12-4*01	TRBJ2-7*01
CASSEGGSSYNEQFF	TRBV5-1*01	TRBJ2-1*01
CASRLGGFNEKLFF	TRBV6-1*01	TRBJ1-4*01
CASRTGASTDTQYF	TRBV5-1*01	TRBJ2-3*01
CASSLEVAGVREQYF	TRBV11-2*01	TRBJ2-7*01
CASSPSEKLFF	TRBV7-9*01	TRBJ1-4*01
CASSLRSRGAENSPLHF	TRBV5-1*01	TRBJ1-6*01
CASSPLAVPSTDTQYF	TRBV7-9*01	TRBJ2-3*01
CAISRGGGDTQYF	TRBV10-3*01	TRBJ2-3*01
CASSLEAGGYNEQFF	TRBV11-1*01	TRBJ2-1*01
CASSLGVLSNEKLFF	TRBV5-1*01	TRBJ1-4*01
CASRKLEGAFF	TRBV2*01	TRBJ1-1*01
CASSLGRLAGAYEQYF	TRBV11-2*01	TRBJ2-7*01
CATSRDETANQPQHF	TRBV15*01	TRBJ1-5*01
CASSLGVRGRRDTQYF	TRBV7-2*01	TRBJ2-3*01
CAISEPTGPNSPLHF	TRBV10-3*01	TRBJ1-6*01
CASSLRGGYEQYF	TRBV5-1*01	TRBJ2-7*01
CSAPGQGSGNTIYF	TRBV20-1*01	TRBJ1-3*01
CASSFWDSSRGANVLTF	TRBV6-1*01	TRBJ2-6*01
CASSSLAGGPDTQYF	TRBV10-1*01	TRBJ2-3*01
CASSSPGQGRGANVLTF	TRBV6-9*01	TRBJ2-6*01
CASSGTSGGSTDTQYF	TRBV27*01	TRBJ2-3*01
CASSQVANSGANVLTF	TRBV4-3*01	TRBJ2-6*01
CASGGDRPLYGYTF	TRBV25-1*01	TRBJ1-2*01
CASSQGQGTTGELFF	TRBV4-3*01	TRBJ2-2*01
CASSFIRGGTGELFF	TRBV12-4*01	TRBJ2-2*01
CASSYVKSGANVLTF	TRBV6-5*01	TRBJ2-6*01
CASIHLPGQGAETQYF	TRBV6-5*01	TRBJ2-5*01
CASSNWGNEQFF	TRBV6-5*01	TRBJ2-1*01
CASNPNTGELFF	TRBV7-9*01	TRBJ2-2*01
CSVFSGRTDTQYF	TRBV29-1*01	TRBJ2-3*01
CATSRRQGAYNEQFF	TRBV15*01	TRBJ2-1*01
CASSSSARDLRGELFF	TRBV7-3*01	TRBJ2-2*01
CSAPPRTGGLNQPQHF	TRBV20-1*01	TRBJ1-5*01
CATSDFTRGTNEQFF	TRBV24-1*01	TRBJ2-1*01
CASSSPPGAGANVLTF	TRBV28*01	TRBJ2-6*01
CASSQEVEGSEAFF	TRBV4-3*01	TRBJ1-1*01
CASSYIGVQFF	TRBV6-1*01	TRBJ2-1*01
CASSLGPTGELFF	TRBV12-4*01	TRBJ2-2*01
CSAKGSGLYGYTF	TRBV29-1*01	TRBJ1-2*01
CAMGGGYEQFF	TRBV6-6*01	TRBJ2-1*01
CASSAVTDTQYF	TRBV6-6*01	TRBJ2-3*01
CASSRYWPGELFF	TRBV4-1*01	TRBJ2-2*01
CSARDPGETQYF	TRBV20-1*01	TRBJ2-5*01
CASSEAPAYEQYF	TRBV10-1*01	TRBJ2-7*01
CASSEYSGAGGYTF	TRBV25-1*01	TRBJ1-2*01
CASSLDRGGGQYF	TRBV11-2*01	TRBJ2-7*01
CASNGQGRAFF	TRBV6-5*01	TRBJ1-1*01
CAISESSAGGYEQYF	TRBV10-3*01	TRBJ2-7*01
CSASKGERSNQPQHF	TRBV20-1*01	TRBJ1-5*01
CASSVETDQTQYF	TRBV2*01	TRBJ2-5*01
CASSLQGRQETQYF	TRBV5-1*01	TRBJ2-5*01
CSARGLSGESNEQFF	TRBV20-1*01	TRBJ2-1*01
CASSLSVQAVSPGNTIYF	TRBV7-8*01	TRBJ1-3*01
CSVGMRGEGYEQYF	TRBV29-1*01	TRBJ2-7*01
CASREKRPGAPDEQFF	TRBV5-1*01	TRBJ2-1*01
CSVVVAGEYEQYF	TRBV29-1*01	TRBJ2-7*01
CASSFGQDHSPLHF	TRBV5-1*01	TRBJ1-6*01
CASSVGGRAATDTQYF	TRBV9*01	TRBJ2-3*01
CASRRREGAPLAFF	TRBV6-6*01	TRBJ1-1*01
CGGQGDRGELFF	TRBV20-1*01	TRBJ2-2*01
CSASRTGEGTDTQYF	TRBV20-1*01	TRBJ2-3*01
CASSEGGVTDTQYF	TRBV2*01	TRBJ2-3*01
CASSLSVRGLAFF	TRBV11-1*01	TRBJ2-1*01
CSARLLIAGLTDTQYF	TRBV20-1*01	TRBJ2-3*01
CSARAYGTGKGTYEQYF	TRBV20-1*01	TRBJ2-7*01
CASSITGTEQFF	TRBV5-1*01	TRBJ2-1*01
CASSGTDANTGELFF	TRBV6-5*01	TRBJ2-2*01
CASSLLGNEQFF	TRBV10-2*01	TRBJ2-1*01
CSAGPGQPQHF	TRBV20-1*01	TRBJ1-5*01
CASSVGPGRQETQYF	TRBV9*01	TRBJ2-5*01
CASSNLGLGEQYF	TRBV12-4*01	TRBJ2-7*01
CASSLRLAGIQETQYF	TRBV4-1*01	TRBJ2-5*01
CASSEMIQETQYF	TRBV25-1*01	TRBJ2-5*01
CASSYLPARRTQYF	TRBV6-1*01	TRBJ2-5*01
CSAGGGHITNYGYTF	TRBV20-1*01	TRBJ1-2*01
CASSLTGTSSFEQYF	TRBV12-4*01	TRBJ2-7*01
CASSLVRGGGYEQYF	TRBV7-8*01	TRBJ2-7*01
CASSGGSGEKLFF	TRBV5-1*01	TRBJ1-4*01
CASTPRTTETQYF	TRBV2*01	TRBJ2-5*01
CASSLLGAYEQYF	TRBV3-1*01	TRBJ2-7*01
CASSEDSYEQYF	TRBV25-1*01	TRBJ2-7*01
CASSPPVPTEAFF	TRBV18*01	TRBJ1-1*01
CSARAASNQPQHF	TRBV20-1*01	TRBJ1-5*01
CASSYSRIHEQYF	TRBV6-5*01	TRBJ2-7*01
CSAGVYQDVYNSPLHF	TRBV20-1*01	TRBJ1-6*01
CASSEYVNEQFF	TRBV25-1*01	TRBJ2-1*01
CASGLGRSYEQYF	TRBV12-5*01	TRBJ2-7*01
CASSYSTSYEQYF	TRBV6-1*01	TRBJ2-7*01
CASSWTGSTDTQYF	TRBV12-4*01	TRBJ2-3*01
CASSEFAGEETQYF	TRBV2*01	TRBJ2-5*01
CASSFSGGSNQPQHF	TRBV7-9*01	TRBJ1-5*01
CAISERGINTGELFF	TRBV10-3*01	TRBJ2-2*01
CAISPGQGYNEQFF	TRBV10-3*01	TRBJ2-1*01
CASNNRPGETQYF	TRBV19*01	TRBJ2-5*01
CSVGGQSNQPQHF	TRBV29-1*01	TRBJ1-5*01
CSAQPLAGWDQETQYF	TRBV20-1*01	TRBJ2-5*01
CASSYGGVYTEAFF	TRBV6-5*01	TRBJ1-1*01
CAIRRSGDRNQPQHF	TRBV10-3*01	TRBJ1-5*01
CASTRGVPTYNEQFF	TRBV12-4*01	TRBJ2-1*01
CASSPGATSGPTYNEQFF	TRBV7-7*01	TRBJ2-1*01
CASSSRDRENEQYF	TRBV6-5*01	TRBJ2-7*01
CASSLSVGSKNIQYF	TRBV12-4*01	TRBJ2-4*01
CASSPRLAGGQGTQYF	TRBV27*01	TRBJ2-5*01
CASSLHQGQQSPLHF	TRBV7-8*01	TRBJ1-6*01
CASSLYPGRFRHEQYF	TRBV27*01	TRBJ2-7*01
CASSFDSGTAFF	TRBV5-1*01	TRBJ1-1*01
CSASRDRSNQPQHF	TRBV20-1*01	TRBJ1-5*01
CASSLGGSSYEQYF	TRBV7-9*01	TRBJ2-7*01
CASSQAGQTDVYGYTF	TRBV4-3*01	TRBJ1-2*01
CASSSGQGFGQPQHF	TRBV5-4*01	TRBJ1-5*01
CASSPRPVWEQYF	TRBV12-4*01	TRBJ2-7*01
CASSDKENYGYTF	TRBV2*01	TRBJ1-2*01
CASSLSGGSYEQYF	TRBV12-4*01	TRBJ2-7*01
CASSHPGLGKSGELFF	TRBV11-2*01	TRBJ2-2*01
CASSQDFTSTDTQYF	TRBV4-3*01	TRBJ2-3*01
CASSLAGGLYNEQFF	TRBV28*01	TRBJ2-1*01
CASSPHPGLAGGLRDTQYF	TRBV7-3*01	TRBJ2-3*01
CASSPRLAEVTSEQFF	TRBV3-1*01	TRBJ2-1*01
CASSQDEAHEQYF	TRBV3-1*01	TRBJ2-7*01
CASSQALGALNTEAFF	TRBV4-3*01	TRBJ1-1*01
CSARDLDSGGNEQFF	TRBV20-1*01	TRBJ2-1*01
CSVGGVMEDTEAFF	TRBV29-1*01	TRBJ1-1*01
CSVEGTSGSLDEQFF	TRBV29-1*01	TRBJ2-1*01
CSARVLAGVPYEQYF	TRBV20-1*01	TRBJ2-7*01
CASSSNRGNTEAFF	TRBV7-6*01	TRBJ1-1*01
CASSRNTGQPQIRQETQYF	TRBV7-2*01	TRBJ2-5*01
CASSSLNRWTSTDTQYF	TRBV11-3*01	TRBJ2-3*01
CASSLVGQGAKFF	TRBV7-7*01	TRBJ2-1*01
CASSPTLAGANVLTF	TRBV7-2*01	TRBJ2-6*01
CASSVADRSYGYTF	TRBV9*01	TRBJ1-2*01
CASSVAAGTSNEQYF	TRBV9*01	TRBJ2-7*01
CSARPSGSSDTQYF	TRBV20-1*01	TRBJ2-3*01
CATSRVAGGSYNEQFF	TRBV15*01	TRBJ2-1*01
CASSFETGGHYGYTF	TRBV5-1*01	TRBJ1-2*01
CASRWTGGNEQYF	TRBV28*01	TRBJ2-7*01
CSARDPRDGKNSPLHF	TRBV20-1*01	TRBJ1-6*01
CASSPRQGEGYTF	TRBV14*01	TRBJ1-2*01
CASSLGSYNSPLHF	TRBV7-2*01	TRBJ1-6*01
CASRETRSTYEQYF	TRBV14*01	TRBJ2-7*01
CASSADGHRCLQPQHF	TRBV21-1*01	TRBJ1-5*01
CASGTGGSSQPQHF	TRBV6-5*01	TRBJ1-5*01
CSVRPRGRGGSPDAEAFF	TRBV29-1*01	TRBJ1-1*01
CASGEEGALDEQYF	TRBV11-2*01	TRBJ2-7*01
CASSLSRGGSGANVLTF	TRBV28*01	TRBJ2-6*01
CAWGTGVELGEQYF	TRBV30*01	TRBJ2-7*01
CASSEADVSSYF	TRBV6-1*01	TRBJ1-1*01
CAWSGQGNQPQHF	TRBV30*01	TRBJ1-5*01
CASSSREGLTYEQYF	TRBV7-9*01	TRBJ2-7*01
CASSPQNGQGANYGYTF	TRBV18*01	TRBJ1-2*01
CAISRTGTAGYTF	TRBV10-3*01	TRBJ1-2*01
CSARDRVETEAFF	TRBV20-1*01	TRBJ1-1*01
CSAGAGNQPQHF	TRBV20-1*01	TRBJ1-5*01
CASSPGQPSYEQYF	TRBV7-9*01	TRBJ2-7*01
CASSLGQGDNEKLFF	TRBV28*01	TRBJ1-4*01
CATSTGLADTDTQYF	TRBV15*01	TRBJ2-3*01
CAISVADEQYF	TRBV10-3*01	TRBJ2-7*01
CSARDSGMNTEAFF	TRBV20-1*01	TRBJ1-1*01
CASSTASTDTQYF	TRBV7-2*01	TRBJ2-3*01
CATSPTRGSYNEQFF	TRBV24-1*01	TRBJ2-1*01
CASTWRVAGSGELFF	TRBV28*01	TRBJ2-2*01
CASSLQGAYTEAFF	TRBV5-5*01	TRBJ1-1*01
CAISSDAGELFF	TRBV7-9*01	TRBJ2-2*01
CASNKVGQGSGELFF	TRBV6-1*01	TRBJ2-2*01
CASSARSFTTGELFF	TRBV2*01	TRBJ2-2*01
CASSGPRETDTQYF	TRBV28*01	TRBJ2-3*01
CASRGRGIYNEQFF	TRBV12-4*01	TRBJ2-1*01
CASSLGQSGSPLHF	TRBV11-3*01	TRBJ1-6*01
CAWSIGRANEQFF	TRBV30*01	TRBJ2-1*01
CASSLGRGRAQYF	TRBV7-2*01	TRBJ2-3*01
CASSQSVTQYF	TRBV4-1*01	TRBJ2-3*01
CASTLSGYSNQPQHF	TRBV12-4*01	TRBJ1-5*01
CSVGARVGEQYF	TRBV29-1*01	TRBJ2-7*01
CAISGDANYGYTF	TRBV10-3*01	TRBJ1-2*01
CASSQDRLAGRSYSFF	TRBV4-3*01	TRBJ2-1*01
CSARTGLAGELPDTQYF	TRBV20-1*01	TRBJ2-3*01
CASGHSGNTIYF	TRBV11-2*01	TRBJ1-3*01
CASSRGAYEQYF	TRBV11-1*01	TRBJ2-7*01
CASSLGLAVNTGELFF	TRBV7-6*01	TRBJ2-2*01
CASSFLEAGGQFF	TRBV11-1*01	TRBJ2-1*01
CASSGADNEQFF	TRBV5-6*01	TRBJ2-1*01
CSAPGPFRDEQYF	TRBV20-1*01	TRBJ2-7*01
CASNDRDNQPQHF	TRBV2*01	TRBJ1-5*01
CASSRGQVQETQYF	TRBV12-4*01	TRBJ2-5*01
CATSRTLSGGDQPQHF	TRBV15*01	TRBJ1-5*01
CASSFNLGEGANVLTF	TRBV28*01	TRBJ2-6*01
CASSLSSGNYGYTF	TRBV27*01	TRBJ1-2*01
CATSDTSGADTQYF	TRBV24-1*01	TRBJ2-3*01
CSAGGVAPSDTQYF	TRBV20-1*01	TRBJ2-3*01
CASSFQRAPLHF	TRBV27*01	TRBJ1-6*01
CASSSPDRGLLRDTQYF	TRBV11-2*01	TRBJ2-3*01
CASSYSASGAYEQYF	TRBV6-5*01	TRBJ2-7*01
CASSLVGTTYEQYF	TRBV7-8*01	TRBJ2-7*01
CATSRGWGQANYNEQFF	TRBV15*01	TRBJ2-1*01
CASSSIGAQRSPEGEQFF	TRBV11-2*01	TRBJ2-1*01
CASSDETYEQYF	TRBV2*01	TRBJ2-7*01
CAIGDRDYNEQFF	TRBV10-3*01	TRBJ2-1*01
CASSPGGGGYNEQFF	TRBV18*01	TRBJ2-1*01
CASSLTGRNEQFF	TRBV7-2*01	TRBJ2-1*01
CASSVAGRNTGELFF	TRBV9*01	TRBJ2-2*01
CASSQVFRGQGNTEAFF	TRBV14*01	TRBJ1-1*01
CASIRPAREAFF	TRBV6-1*01	TRBJ1-1*01
CASSHDSGKSPLHF	TRBV7-9*01	TRBJ1-6*01
CATSARGQLANTEAFF	TRBV24-1*01	TRBJ1-1*01
CASREGVNTEAFF	TRBV27*01	TRBJ1-1*01
CASSFRSPADTEAFF	TRBV7-9*01	TRBJ1-1*01
CASSLGPSGATDTQYF	TRBV7-2*01	TRBJ2-3*01
CASSWGLAGGPNTGELFF	TRBV7-6*01	TRBJ2-2*01
CASSSSARGARGYTF	TRBV7-6*01	TRBJ1-2*01
CASSPQGVSNTGELFF	TRBV2*01	TRBJ2-2*01
CASSIPGTQIQYF	TRBV7-8*01	TRBJ2-4*01
CAIRPTGAATDTQYF	TRBV10-3*01	TRBJ2-3*01
CASSGQRQNNEQFF	TRBV6-1*01	TRBJ2-1*01
CASSSQVLYYYGYTF	TRBV6-1*01	TRBJ1-2*01
CASSRALGGPQLQPQHF	TRBV4-1*01	TRBJ1-5*01
CASSVRDRGLGGYTF	TRBV27*01	TRBJ1-2*01
CASTSPAEGESGYTF	TRBV28*01	TRBJ1-2*01
CSARDHPGLTGELFF	TRBV20-1*01	TRBJ2-2*01
CASSSGASADTQYF	TRBV5-1*01	TRBJ2-3*01
CASSSDSTTSTDTQYF	TRBV7-3*01	TRBJ2-3*01
CSAPGTFNNEQFF	TRBV20-1*01	TRBJ2-1*01
CASSQGVSHSGANVLTF	TRBV4-3*01	TRBJ2-6*01
CASKLSSGRGAYNEQFF	TRBV10-2*01	TRBJ2-1*01
CASSPVHGPDTQYF	TRBV10-1*01	TRBJ2-3*01
CASSLDRVALGPQYF	TRBV5-4*01	TRBJ2-3*01
CASRFSGANVLTF	TRBV7-2*01	TRBJ2-6*01
CASNSYSGWSEQFF	TRBV6-5*01	TRBJ2-1*01
CASTSTGTNFSASQYF	TRBV12-4*01	TRBJ2-3*01
CASSSGPNYGYTF	TRBV11-2*01	TRBJ1-2*01
CASSQDEWDRESTDTQYF	TRBV14*01	TRBJ2-3*01
CSVGDTGGAFF	TRBV29-1*01	TRBJ1-1*01
CASSGVGGNTEAFF	TRBV9*01	TRBJ1-1*01
CASSYAGTSSYEQYF	TRBV7-8*01	TRBJ2-7*01
CASEETGGLLGAFF	TRBV28*01	TRBJ1-1*01
CASSFRDYQLNTGELFF	TRBV5-1*01	TRBJ2-2*01
CASSPRGVLSEAFF	TRBV3-1*01	TRBJ1-1*01
CASSEALRNEQFF	TRBV6-1*01	TRBJ2-1*01
CASSHPAYYEQYF	TRBV7-2*01	TRBJ2-7*01
CASSQGTSTDTQYF	TRBV7-3*01	TRBJ2-3*01
CASSLVAGGGNTIYF	TRBV5-1*01	TRBJ1-3*01
CSAPSGNGAQYF	TRBV20-1*01	TRBJ2-5*01
CASSPQGGLVTKNIQYF	TRBV5-1*01	TRBJ2-4*01
CASSYGGINYGYTF	TRBV6-1*01	TRBJ1-2*01
CASNLAGPYNEQFF	TRBV5-1*01	TRBJ2-1*01
CASSLRQNYGYTF	TRBV27*01	TRBJ1-2*01
CASSGTGDQPQHF	TRBV27*01	TRBJ1-5*01
CASSQGPGGPTQETQYF	TRBV4-3*01	TRBJ2-5*01
CSALHFDSSEAFF	TRBV20-1*01	TRBJ1-1*01
CASLTWDSWVTQYF	TRBV3-1*01	TRBJ2-5*01
CASSKTGGQPQHF	TRBV14*01	TRBJ1-5*01
CAWSIHRERNEQFF	TRBV30*01	TRBJ2-1*01
CASSLGGPGTDTQYF	TRBV12-4*01	TRBJ2-3*01
CASSSYPGIQPQHF	TRBV7-2*01	TRBJ1-5*01
CSAKRPGRSNEKLFF	TRBV20-1*01	TRBJ1-4*01
CSSAVGNTIYF	TRBV29-1*01	TRBJ1-3*01
CASSTHTDTQYF	TRBV27*01	TRBJ2-3*01
CASSFLTGDTGELFF	TRBV13*01	TRBJ2-2*01
CASSAYYEQYF	TRBV9*01	TRBJ2-7*01
CARSFPGNYGYTF	TRBV5-5*01	TRBJ1-2*01
CSARAQPQHF	TRBV20-1*01	TRBJ1-5*01
CASSPLASANEKLFF	TRBV5-1*01	TRBJ1-4*01
CASSPDGGPYEQYF	TRBV7-9*01	TRBJ2-7*01
CSARDNSRSPSYGYTF	TRBV20-1*01	TRBJ1-2*01
CASSLEVNQPQHF	TRBV5-1*01	TRBJ1-5*01
CASSTWCQDSPLHF	TRBV7-2*01	TRBJ1-6*01
CASSTGGEQYF	TRBV6-1*01	TRBJ2-7*01
CASSLGDRTYEQYF	TRBV7-9*01	TRBJ2-7*01
CASSLQRMNTEAFF	TRBV5-5*01	TRBJ1-1*01
CASGPSGRGTEAFF	TRBV12-5*01	TRBJ1-1*01
CASSYGDREYEQFF	TRBV6-5*01	TRBJ2-1*01
CSVEARGMNTEAFF	TRBV29-1*01	TRBJ1-1*01
CASSLDLRDTDTQYF	TRBV12-4*01	TRBJ2-3*01
CASSSSGGADNEQFF	TRBV4-2*01	TRBJ2-1*01
CASSQQTRNSNQPQHF	TRBV27*01	TRBJ1-5*01
CASSVSGSGNEQFF	TRBV2*01	TRBJ2-1*01
CASSPGLAGGSDTQYF	TRBV6-9*01	TRBJ2-3*01
CASSQSGRASNEQFF	TRBV5-4*01	TRBJ2-1*01
CASSLGDYQFRELFF	TRBV7-2*01	TRBJ2-2*01
CASSLNSNYGYTF	TRBV3-1*01	TRBJ1-2*01
CASFLGGGGMNTEAFF	TRBV27*01	TRBJ1-1*01
CASSLDRASGTDTQYF	TRBV7-2*01	TRBJ2-3*01
CAIGGQRSGANVLTF	TRBV28*01	TRBJ2-6*01
CASSPNRGGWGNEQFF	TRBV6-1*01	TRBJ2-1*01
CASTDRLYQPQHF	TRBV6-1*01	TRBJ1-5*01
CASFRYGQGGGEAFF	TRBV6-1*01	TRBJ1-1*01
CRAHLGLAVTHETQYF	TRBV20-1*01	TRBJ2-5*01
CASSLGTGVSGYTF	TRBV12-4*01	TRBJ1-2*01
CSVRTSGRTDTQYF	TRBV29-1*01	TRBJ2-3*01
CASRAQANTEAFF	TRBV2*01	TRBJ1-1*01
CASSLGGATDTQYF	TRBV7-3*01	TRBJ2-3*01
CASFRGGGEKLFF	TRBV6-1*01	TRBJ1-4*01
CASSLVGADTQYF	TRBV7-8*01	TRBJ2-3*01
CASSLGQGPSGANVLTF	TRBV5-1*01	TRBJ2-6*01
CASSYTGTGGYNEQFF	TRBV6-6*01	TRBJ2-1*01
CASSASGRGTDTQYF	TRBV9*01	TRBJ2-3*01
CASSELGTSGGVTDTQYF	TRBV25-1*01	TRBJ2-3*01
CSVDPTGDYGYTF	TRBV29-1*01	TRBJ1-2*01
CASSYADLHTGELFF	TRBV6-5*01	TRBJ2-2*01
CATSRDAAAGEQYF	TRBV15*01	TRBJ2-7*01
CASSPGQGYGYTF	TRBV7-9*01	TRBJ1-2*01
CAWNSAPGELFF	TRBV30*01	TRBJ2-2*01
CASSEVFLSSGNNEQFF	TRBV6-1*01	TRBJ2-1*01
CASSLVQGGQPQHF	TRBV12-4*01	TRBJ1-5*01
CASSLIQETQYF	TRBV12-4*01	TRBJ2-5*01
CSADRGQGETQYF	TRBV29-1*01	TRBJ2-5*01
CSARETSGALTETQYF	TRBV20-1*01	TRBJ2-5*01
CASSSHSGQGITEAFF	TRBV5-1*01	TRBJ1-1*01
CSARSLAGGQGTQYF	TRBV20-1*01	TRBJ2-5*01
CASSYSRTGYGNEQFF	TRBV6-5*01	TRBJ2-1*01
CASSRDRAGFTDTQYF	TRBV10-2*01	TRBJ2-3*01
CSASGTADQPQHF	TRBV20-1*01	TRBJ1-5*01
CSARGGNKDTQYF	TRBV20-1*01	TRBJ2-3*01
CASSPRPSMVDEQYF	TRBV21-1*01	TRBJ2-7*01
CASSLLGGNEQFF	TRBV28*01	TRBJ2-1*01
CASSQGKPPGYSNQPQHF	TRBV4-1*01	TRBJ1-5*01
CASSYSRLRENQPQHF	TRBV6-1*01	TRBJ1-5*01
CASSYLGSSSGNTIYF	TRBV6-6*01	TRBJ1-3*01
CASSVRQGSGSYTF	TRBV6-1*01	TRBJ1-2*01
CASSQTGIGEQYF	TRBV6-1*01	TRBJ2-7*01
CASSVGDSDTQYF	TRBV6-4*01	TRBJ2-3*01
CASSPPGSGYTF	TRBV3-1*01	TRBJ1-2*01
CASSMSPDGVYEQYF	TRBV19*01	TRBJ2-7*01
CASSQGQGGNNEQFF	TRBV28*01	TRBJ2-1*01
CASSLCIGRATPCEEQYF	TRBV28*01	TRBJ2-7*01
CASSQDVARSSYNEQFF	TRBV4-2*01	TRBJ2-1*01
CASSYHPSYYGYTF	TRBV6-1*01	TRBJ1-2*01
CASSLAGSGYTF	TRBV7-9*01	TRBJ1-2*01
CASSLGGPFSDVLTF	TRBV7-9*01	TRBJ2-6*01
CASSVGPSVYNEQFF	TRBV9*01	TRBJ2-1*01
CASSATSGGDGELFF	TRBV7-8*01	TRBJ2-2*01
CSVFTSMNTEAFF	TRBV29-1*01	TRBJ1-1*01
CASSDPVLYTQYF	TRBV2*01	TRBJ2-3*01
CSARDPLQGAGETQYF	TRBV20-1*01	TRBJ2-5*01
CASSSGQGAGTDTQYF	TRBV6-6*01	TRBJ2-3*01
CSAIGTSGRASYNEQFF	TRBV20-1*01	TRBJ2-1*01
CASTSGQSHTEAFF	TRBV6-5*01	TRBJ1-1*01
CASSLFLNQPQHF	TRBV6-5*01	TRBJ1-5*01
CASSPQGAKNSPLHF	TRBV18*01	TRBJ1-6*01
CSAVPTGAHYGYTF	TRBV20-1*01	TRBJ1-2*01
CASRPGTGGLLYF	TRBV6-1*01	TRBJ2-5*01
CAISEETYEQYF	TRBV10-3*01	TRBJ2-7*01
CATSDPQGADTQYF	TRBV24-1*01	TRBJ2-3*01
CASSLSGGRSKNIQYF	TRBV7-2*01	TRBJ2-4*01
CASSPLSGTITYEQYF	TRBV5-1*01	TRBJ2-7*01
CASSLGTSGGLSVTDTQYF	TRBV5-1*01	TRBJ2-3*01
CASSFETSGRHTQYF	TRBV11-1*01	TRBJ2-3*01
CASSPQDRVGHGYTF	TRBV7-2*01	TRBJ1-2*01
CSVAREETQYF	TRBV29-1*01	TRBJ2-5*01
CSVGDGSRSQPQHF	TRBV29-1*01	TRBJ1-5*01
CASSTGTSGGGYNEQFF	TRBV12-4*01	TRBJ2-1*01
CASNKLGGYEQYF	TRBV28*01	TRBJ2-7*01
CASSFSNEQFF	TRBV28*01	TRBJ2-1*01
CASSEDSGLEDEQFF	TRBV13*01	TRBJ2-1*01
CASSPTGPYEQYF	TRBV27*01	TRBJ2-7*01
CSVVQGGATQYF	TRBV29-1*01	TRBJ2-5*01
CASSVEGSQPQHF	TRBV2*01	TRBJ1-5*01
CASSQDRGGSGSPLHF	TRBV14*01	TRBJ1-6*01
CSVAAAPGDNEQFF	TRBV29-1*01	TRBJ2-1*01
CSGCSMTSVPIEPQHF	TRBV20-1*01	TRBJ1-5*01
CASSGSGQGSLGQYF	TRBV28*01	TRBJ2-7*01
CASSYSRRDQPQHF	TRBV6-5*01	TRBJ1-5*01
CASTLGGGTDTQYF	TRBV12-4*01	TRBJ2-3*01
CASSFLGGGYEQYF	TRBV12-4*01	TRBJ2-7*01
CASSLTGGNSPLHF	TRBV28*01	TRBJ1-6*01
CSARDRSSYEQYF	TRBV20-1*01	TRBJ2-7*01
CASSQDRQGAAYEQYF	TRBV4-2*01	TRBJ2-7*01
CASSGGSLGYEQYF	TRBV11-1*01	TRBJ2-7*01
CASSRHKRGKGNEQFF	TRBV6-1*01	TRBJ2-1*01
CASSLSGSNQPQHF	TRBV12-4*01	TRBJ1-5*01
CASSYLMGDTEAFF	TRBV6-5*01	TRBJ1-1*01
CSARTGEETQYF	TRBV20-1*01	TRBJ2-5*01
CASSPGDPSNQPQHF	TRBV18*01	TRBJ1-5*01
CASSVGSPASGSGEQYF	TRBV9*01	TRBJ2-7*01
CAWNQGQGNQPQHF	TRBV30*01	TRBJ1-5*01
CASRRGQGTYEQYF	TRBV6-5*01	TRBJ2-7*01
CASSPIPQETQYF	TRBV7-9*01	TRBJ2-5*01
CASSLWGQFSGNTIYF	TRBV7-2*01	TRBJ1-3*01
CASSPATRELFF	TRBV7-2*01	TRBJ2-2*01
CASSLDGDDEQYF	TRBV5-1*01	TRBJ2-7*01
CSVEDLGDYNEQFF	TRBV29-1*01	TRBJ2-1*01
CASSSRTPPDTQYF	TRBV11-2*01	TRBJ2-3*01
CASSARDRQETQYF	TRBV12-4*01	TRBJ2-5*01
CASSQERGTSYGYTF	TRBV4-2*01	TRBJ1-2*01
CASKIWDRENSPLHF	TRBV3-1*01	TRBJ1-6*01
CASSYRLPRDTGELFF	TRBV5-1*01	TRBJ2-2*01
CARSHGTGGNQPQHF	TRBV6-5*01	TRBJ1-5*01
CASTYERGPTDTQYF	TRBV7-2*01	TRBJ2-3*01
CASRLTGGNEQFF	TRBV6-9*01	TRBJ2-1*01
CASSSYQGRTQYF	TRBV27*01	TRBJ2-5*01
CASSLTGRSDTEAFF	TRBV11-2*01	TRBJ1-1*01
CASTKSQANYGYTF	TRBV6-1*01	TRBJ1-2*01
CASSRREGAEQYF	TRBV7-3*01	TRBJ2-7*01
CASSDQEPLRGGELFF	TRBV5-1*01	TRBJ2-2*01
CATSRAGAAQYF	TRBV15*01	TRBJ2-5*01
CAWRGPGTGRYLFF	TRBV30*01	TRBJ2-1*01
CASSDGGRAEAFF	TRBV2*01	TRBJ1-1*01
CASSEAAGANYGYTF	TRBV6-1*01	TRBJ1-2*01
CSASFGGPYEQYF	TRBV20-1*01	TRBJ2-7*01
CASSTTSADTQYF	TRBV5-1*01	TRBJ2-3*01
CASSQELAGGNQETQYF	TRBV4-2*01	TRBJ2-5*01
CASSWSRSYNEQFF	TRBV7-2*01	TRBJ2-1*01
CASSDRGGAYGYTF	TRBV2*01	TRBJ1-2*01
CASSRLNQPQHF	TRBV2*01	TRBJ1-5*01
CASSAGLAGVYNEQFF	TRBV28*01	TRBJ2-1*01
CASRGEGEQFF	TRBV9*01	TRBJ2-1*01
CASSQERGNTQYF	TRBV3-1*01	TRBJ2-3*01
CASSEGLNYGYTF	TRBV6-1*01	TRBJ1-2*01
CATSFPGVGQPQHF	TRBV15*01	TRBJ1-5*01
CASRRGLNYGYTF	TRBV12-4*01	TRBJ1-2*01
CASNRVGQPQHF	TRBV2*01	TRBJ1-5*01
CASSFQNTGELFF	TRBV12-4*01	TRBJ2-2*01
CASSVAADRHTEKLFF	TRBV5-1*01	TRBJ1-4*01
CASSYSGRPVRTEAFF	TRBV6-1*01	TRBJ1-1*01
CASCTPERGYPGYTF	TRBV9*01	TRBJ1-2*01
CASSQERQGGREQYF	TRBV4-2*01	TRBJ2-7*01
CATLQGWPQHF	TRBV12-4*01	TRBJ1-5*01
CASSPGPNYGYTF	TRBV5-1*01	TRBJ1-2*01
CASSHSDREETQYF	TRBV4-2*01	TRBJ2-5*01
CASSEQGESWGQPQHF	TRBV6-1*01	TRBJ1-5*01
CASGKVSSYNEQFF	TRBV2*01	TRBJ2-1*01
CASGGSGANVLTF	TRBV5-1*01	TRBJ2-6*01
CASSYYSGLTDTQYF	TRBV25-1*01	TRBJ2-3*01
CASSQDSTSYEQYF	TRBV3-1*01	TRBJ2-7*01
CASSFGGGDTGELFF	TRBV7-7*01	TRBJ2-2*01
CASSLEGGKNTGELFF	TRBV7-8*01	TRBJ2-2*01
CASGLELPGNTIYF	TRBV12-5*01	TRBJ1-3*01
CASSPGTASVAFF	TRBV12-4*01	TRBJ1-1*01
CASSWGLAGTDTQYF	TRBV7-9*01	TRBJ2-3*01
CASTRGGSYNEQFF	TRBV7-2*01	TRBJ2-1*01
CASSSWARGFNQPQHF	TRBV11-2*01	TRBJ1-5*01
CASSLGVGALSTDTQYF	TRBV7-8*01	TRBJ2-3*01
CASSLAAWETQYF	TRBV7-2*01	TRBJ2-5*01
CASSFWGEKDTEAFF	TRBV7-9*01	TRBJ1-1*01
CASSGGVQTYYGYTF	TRBV3-1*01	TRBJ1-2*01
CASSEAQVGYTF	TRBV2*01	TRBJ1-2*01
CASRLSGANVLTF	TRBV28*01	TRBJ2-6*01
CASSEAGAGGPWETQYF	TRBV2*01	TRBJ2-5*01
CASSLRTGTNSGNTIYF	TRBV11-2*01	TRBJ1-3*01
CASSEQGAGQPQHF	TRBV6-1*01	TRBJ1-5*01
CASIMFSGAYEQYF	TRBV2*01	TRBJ2-7*01
CASSFTGGRVHEQFF	TRBV12-4*01	TRBJ2-1*01
CSAEGQGDNGTISYAQYF	TRBV20-1*01	TRBJ2-3*01
CASSHRVKPSTDTQYF	TRBV6-5*01	TRBJ2-3*01
CASSLLFWETNQPQHF	TRBV3-1*01	TRBJ1-5*01
CVSREQGAGNTIYF	TRBV28*01	TRBJ1-3*01
CASRTGPSLAEQYF	TRBV6-6*01	TRBJ2-7*01
CASSSRPDLQETQYF	TRBV11-2*01	TRBJ2-5*01
CASSQSGLAGTDTQYF	TRBV4-2*01	TRBJ2-3*01
CASSSVGVAVYNEQFF	TRBV4-1*01	TRBJ2-1*01
CATSQGYTEAFF	TRBV15*01	TRBJ1-1*01
CASRPVGTGLFYEQYF	TRBV2*01	TRBJ2-7*01
CASSSTFFLAKNIQYF	TRBV27*01	TRBJ2-4*01
CASTGSVGGYEQYF	TRBV28*01	TRBJ2-7*01
CSARDVGTSGNLGEQFF	TRBV20-1*01	TRBJ2-1*01
CASTPLAGADTQYF	TRBV12-4*01	TRBJ2-3*01
CASSLGPGNTEAFF	TRBV18*01	TRBJ1-1*01
CASSQGQVGYTF	TRBV3-1*01	TRBJ1-2*01
CASSFAGGRGYTF	TRBV5-5*01	TRBJ1-2*01
CASSPGGTEAFF	TRBV6-6*01	TRBJ1-1*01
CASSQDGQSTEAFF	TRBV4-2*01	TRBJ1-1*01
CASTPEAPQAFF	TRBV7-9*01	TRBJ1-1*01
CASSQGPSGGNTDTQYF	TRBV4-1*01	TRBJ2-3*01
CASLDFTDTQYF	TRBV12-4*01	TRBJ2-3*01
CASSPRLAGGVDTQYF	TRBV11-2*01	TRBJ2-3*01
CASSQPRGRGLPPLHF	TRBV3-1*01	TRBJ1-6*01
CSAGTAYEQYF	TRBV20-1*01	TRBJ2-7*01
CSVWTASTDTQYF	TRBV29-1*01	TRBJ2-3*01
CASSPRGFEGPSGANVLTF	TRBV7-9*01	TRBJ2-6*01
CASSQAGAMYSPLHF	TRBV14*01	TRBJ1-6*01
CASSPNAAKNIQYF	TRBV7-2*01	TRBJ2-4*01
CASSLRTSGGTDTQYF	TRBV5-1*01	TRBJ2-3*01
CSARNSGRANTGELFF	TRBV20-1*01	TRBJ2-2*01
CASSLVGGGDNEQFF	TRBV7-8*01	TRBJ2-1*01
CASSAATCGRRETQYF	TRBV7-8*01	TRBJ2-5*01
CASSFTGDYTEAFF	TRBV6-5*01	TRBJ1-1*01
CSVPENTEAFF	TRBV29-1*01	TRBJ1-1*01
CSASGQFDIQYF	TRBV20-1*01	TRBJ2-4*01
CASSPTSGRFYEQYF	TRBV7-8*01	TRBJ2-7*01
CASSSPGQASNQPQHF	TRBV19*01	TRBJ1-5*01
CATSDFRSPTGELFF	TRBV24-1*01	TRBJ2-2*01
CAIGGEGADEKLFF	TRBV10-3*01	TRBJ1-4*01
CASSSGTGGGTEAFF	TRBV12-4*01	TRBJ1-1*01
CASSLVRERNTEAFF	TRBV4-1*01	TRBJ1-1*01
CASSLAPFGNTEAFF	TRBV7-2*01	TRBJ1-1*01
CASSLLVQPQHF	TRBV28*01	TRBJ1-5*01
CASSQLRSGTEAFF	TRBV14*01	TRBJ1-1*01
CASSQIQGRHTEAFF	TRBV4-3*01	TRBJ1-1*01
CASSQTPDRGNSPLHF	TRBV14*01	TRBJ1-6*01
CASSQEGHFDLSSPLHF	TRBV4-1*01	TRBJ1-6*01
CASSLTGETSQPQHF	TRBV28*01	TRBJ1-5*01
CASIGTSGFEQFF	TRBV19*01	TRBJ2-1*01
CASSLGTVNQPQHF	TRBV5-5*01	TRBJ1-5*01
CASSQRGTGGVEAFF	TRBV18*01	TRBJ1-1*01
CASSPPLFERVPQETQYF	TRBV18*01	TRBJ2-5*01
CASALGRARGEQYF	TRBV12-4*01	TRBJ2-7*01
CSVKPGQVTSYEQYF	TRBV29-1*01	TRBJ2-7*01
CASSLMLAEPSGQFF	TRBV5-5*01	TRBJ2-1*01
CASSPTRNEQFF	TRBV4-2*01	TRBJ2-1*01
CASINRARTGNTIYF	TRBV28*01	TRBJ1-3*01
CASSLPGQLNTEAFF	TRBV28*01	TRBJ1-1*01
CASSIVPAGGVTGELFF	TRBV19*01	TRBJ2-2*01
CASSLSQGANEQFF	TRBV7-7*01	TRBJ2-1*01
CASGGLAKLASDTQYF	TRBV10-2*01	TRBJ2-3*01
CASSVLNTEAFF	TRBV2*01	TRBJ1-1*01
CASSFSGVGLAGYEQYF	TRBV7-2*01	TRBJ2-7*01
CASSPTRTENYGYTF	TRBV18*01	TRBJ1-2*01
CASTERGQVSNQPQHF	TRBV28*01	TRBJ1-5*01
CASSDRDKGVWAQYF	TRBV5-4*01	TRBJ2-5*01
CASSPEGGEQFF	TRBV16*01	TRBJ2-1*01
CASSLGDGYSGNTIYF	TRBV5-1*01	TRBJ1-3*01
CASSPNSGSTEAFF	TRBV5-6*01	TRBJ1-1*01
CSVGAVELRNEQFF	TRBV29-1*01	TRBJ2-1*01
CASSFGTSGDNEQFF	TRBV6-5*01	TRBJ2-1*01
CASSPLAMDYEQYF	TRBV11-2*01	TRBJ2-7*01
CASSSPATYEQYF	TRBV6-6*01	TRBJ2-7*01
CASSGGRNPPQHF	TRBV25-1*01	TRBJ1-5*01
CASSLLGGLGNEQFF	TRBV7-8*01	TRBJ2-1*01
CASSYLTSTDTQYF	TRBV5-1*01	TRBJ2-3*01
CASSATGTGYGYTF	TRBV19*01	TRBJ1-2*01
CSGWTGETQYF	TRBV29-1*01	TRBJ2-5*01
CASSPLAGGVADTQYF	TRBV7-3*01	TRBJ2-3*01
CASSQDSHEAFF	TRBV3-1*01	TRBJ1-1*01
CASSLGDYGYTF	TRBV7-8*01	TRBJ1-2*01
CASSLLSGARQETQYF	TRBV12-4*01	TRBJ2-5*01
CASSKQGGNEKLFF	TRBV7-9*01	TRBJ1-4*01
CASSLGPPGDGYGYTF	TRBV7-9*01	TRBJ1-2*01
CASSLGSAYEQYF	TRBV12-4*01	TRBJ2-7*01
CASSYLRGSGNTEAFF	TRBV6-6*01	TRBJ1-1*01
CASSPTGSPHEQYF	TRBV7-9*01	TRBJ2-7*01
CASTTASGGTYNEQFF	TRBV5-1*01	TRBJ2-1*01
CATSERDGGEAFF	TRBV24-1*01	TRBJ1-1*01
CASRALGAGELFF	TRBV2*01	TRBJ2-2*01
CASSFRTDGSPLHF	TRBV27*01	TRBJ1-6*01
CASSYGRARRTDTQYF	TRBV6-6*01	TRBJ2-3*01
CASSSNTAGTGELFF	TRBV27*01	TRBJ2-2*01
CASSLSAQHNQPQHF	TRBV7-8*01	TRBJ1-5*01
CASSPLGLTQYF	TRBV4-1*01	TRBJ2-3*01
CSARRGRNYGYTF	TRBV20-1*01	TRBJ1-2*01
CSVDEGKGQYF	TRBV29-1*01	TRBJ2-7*01
CASSYFPRRGYEQYF	TRBV6-5*01	TRBJ2-7*01
CASSTRGLEQYF	TRBV28*01	TRBJ2-7*01
CASSVAGDGTGELFF	TRBV9*01	TRBJ2-2*01
CSVRGLAGGHEQFF	TRBV20-1*01	TRBJ2-1*01
CASSFEDPYEQYF	TRBV12-4*01	TRBJ2-7*01
CASSLLGVRQAAYQPQHF	TRBV7-2*01	TRBJ1-5*01
CASSSTSNYGYTF	TRBV7-9*01	TRBJ1-2*01
CASSLTVPDTGELFF	TRBV5-5*01	TRBJ2-2*01
CASSPRQVDSYEQYF	TRBV27*01	TRBJ2-7*01
CAISEGNQPQHF	TRBV10-3*01	TRBJ1-5*01
CASSPSAQVTVTEAFF	TRBV2*01	TRBJ1-1*01
CASSIGGASTGELFF	TRBV19*01	TRBJ2-2*01
CSGTGLYNEQFF	TRBV20-1*01	TRBJ2-1*01
CASSPALTGTEAFF	TRBV6-1*01	TRBJ1-1*01
CSVEARQGSYGYTF	TRBV29-1*01	TRBJ1-2*01
CASSARTGVFEKLFF	TRBV7-8*01	TRBJ1-4*01
CASSWGTGVVTDTQYF	TRBV5-1*01	TRBJ2-3*01
CASSLGQGASEAFF	TRBV27*01	TRBJ1-1*01
CASSLFANTGELFF	TRBV27*01	TRBJ2-2*01
CASSSTGTSYTQYF	TRBV13*01	TRBJ2-3*01
CASIPGDSSGNTIYF	TRBV19*01	TRBJ1-3*01
CASSQPGTGWGYTF	TRBV4-1*01	TRBJ1-2*01
CASSTTSVTYNEQFF	TRBV7-2*01	TRBJ2-1*01
CSVGQGAANTEAFF	TRBV29-1*01	TRBJ1-1*01
CASSRKAGKSYYGYTF	TRBV6-6*01	TRBJ1-2*01
CSVEGVDSPLRRTGELFF	TRBV29-1*01	TRBJ2-2*01
CSVEVLGQGAGANVLTF	TRBV29-1*01	TRBJ2-6*01
CATSRDKDTQYF	TRBV15*01	TRBJ2-3*01
CASSEGQGNTGELFF	TRBV2*01	TRBJ2-2*01
CASSPVAGGEETQYF	TRBV4-2*01	TRBJ2-5*01
CSVGEQNTEAFF	TRBV29-1*01	TRBJ1-1*01
CSVVEVAGANVLTF	TRBV29-1*01	TRBJ2-6*01
CASSQAGPSGANVLTF	TRBV4-2*01	TRBJ2-6*01
CAWSVGLSGNTIYF	TRBV30*01	TRBJ1-3*01
CASSVGTSGYTGELFF	TRBV9*01	TRBJ2-2*01
CASTTGTLGYYEQYF	TRBV28*01	TRBJ2-7*01
CASSLEGTPGWETQYF	TRBV12-4*01	TRBJ2-5*01
CAISAERGSSYNEQFF	TRBV10-3*01	TRBJ2-1*01
CASTSTGYEQYF	TRBV6-1*01	TRBJ2-7*01
CASSQGQALLGETQYF	TRBV3-1*01	TRBJ2-5*01
CASSLAVGLAGAYEQYF	TRBV7-2*01	TRBJ2-7*01
CASSFVSDRAETQYF	TRBV7-2*01	TRBJ2-5*01
CSVGADRVFPEAFF	TRBV29-1*01	TRBJ1-1*01
CASSQTSGSGNEQFF	TRBV3-1*01	TRBJ2-1*01
CASRATGPETQYF	TRBV28*01	TRBJ2-5*01
CSARDRPRSGGEQFF	TRBV20-1*01	TRBJ2-1*01
CASSPPEETQYF	TRBV18*01	TRBJ2-5*01
CASSLAGAYNEQFF	TRBV7-8*01	TRBJ2-1*01
CASRRLASSSYNEQFF	TRBV6-1*01	TRBJ2-1*01
CASSLTESNNEQFF	TRBV6-5*01	TRBJ2-1*01
CSVEKPGTASQYF	TRBV29-1*01	TRBJ2-7*01
CSVDGGTGELFF	TRBV29-1*01	TRBJ2-2*01
CASSQNRGSTDTQYF	TRBV5-1*01	TRBJ2-3*01
CATSDFSSGGTDTQYF	TRBV24-1*01	TRBJ2-3*01
CASIADKAYNSPLHF	TRBV2*01	TRBJ1-6*01
CASSLGTGGKTQYF	TRBV5-1*01	TRBJ2-5*01
CSASLNLAPYEQYF	TRBV20-1*01	TRBJ2-7*01
CASSSRQGDPNQPQHF	TRBV28*01	TRBJ1-5*01
CASSLGQGAAKNIQYF	TRBV3-1*01	TRBJ2-4*01
CASSLGGTGTYEQYF	TRBV27*01	TRBJ2-7*01
CASSLWDRAYEQYF	TRBV7-2*01	TRBJ2-7*01
CASSFLAGVSDTQYF	TRBV5-6*01	TRBJ2-3*01
CASSVEDIGGDEQFF	TRBV9*01	TRBJ2-1*01
CASSLGTFTPSEQYF	TRBV5-1*01	TRBJ2-7*01
CASSYDGKKLFF	TRBV6-6*01	TRBJ1-4*01
CASSLGQSYQPQHF	TRBV7-2*01	TRBJ1-5*01
CASSYGTGTSGHEQFF	TRBV6-6*01	TRBJ2-1*01
CSARDSGNSPLHF	TRBV20-1*01	TRBJ1-6*01
CASSQAQGAPGANVLTF	TRBV4-2*01	TRBJ2-6*01
CASSYSAASSGNTIYF	TRBV6-5*01	TRBJ1-3*01
CASSFAPTNEKLFF	TRBV7-9*01	TRBJ1-4*01
CASSYNSYNEQFF	TRBV27*01	TRBJ2-1*01
CASGTSGGLYNEQFF	TRBV6-1*01	TRBJ2-1*01
CASSYSDNRDGYTF	TRBV6-5*01	TRBJ1-2*01
CASSREGRAAKNIQYF	TRBV28*01	TRBJ2-4*01
CASALKNEQFF	TRBV5-4*01	TRBJ2-1*01
CASSSDYEQYF	TRBV9*01	TRBJ2-7*01
CASSSGGGTDTQYF	TRBV5-1*01	TRBJ2-3*01
CSARDSPVYEQYF	TRBV20-1*01	TRBJ2-7*01
CASSDGGISYNEQFF	TRBV2*01	TRBJ2-1*01
CSGDAPGEHNTEAFF	TRBV29-1*01	TRBJ1-1*01
CARSGGDRFYTGELFF	TRBV9*01	TRBJ2-2*01
CAISDGGTRDAETQYF	TRBV10-3*01	TRBJ2-5*01
CASSRRYTGELFF	TRBV19*01	TRBJ2-2*01
CASSWTSGGSSYNEQFF	TRBV7-8*01	TRBJ2-1*01
CASSPWTSGTYEQYF	TRBV6-1*01	TRBJ2-7*01
CSAGSAGLAGGIQYF	TRBV20-1*01	TRBJ2-4*01
CASSQAMSGYGYTF	TRBV4-2*01	TRBJ1-2*01
CASIRAQTTDTQYF	TRBV2*01	TRBJ2-3*01
CASRAGTGAYWALHF	TRBV12-4*01	TRBJ1-6*01
CASSGQSISYEQYF	TRBV2*01	TRBJ2-7*01
CASSLNQSPAEAFF	TRBV7-9*01	TRBJ1-1*01
CASSLDGKVGNEQFF	TRBV7-2*01	TRBJ2-1*01
CASSQTPPGNFTDTQYF	TRBV7-9*01	TRBJ2-3*01
CASSLESQETQYF	TRBV5-4*01	TRBJ2-5*01
CSAEGPAYGYTF	TRBV20-1*01	TRBJ1-2*01
CASSFHGNTIYF	TRBV28*01	TRBJ1-3*01
CASSQVITGGLEETQYF	TRBV4-1*01	TRBJ2-5*01
CASSPRSRPSGGWSGELFF	TRBV11-2*01	TRBJ2-2*01
CASSLAGSSYNSPLHF	TRBV7-2*01	TRBJ1-6*01
CSARRRLAGGTPYEQYF	TRBV20-1*01	TRBJ2-7*01
CASSLGADRWNVLTF	TRBV7-3*01	TRBJ2-6*01
CASSPPGVGETQYF	TRBV9*01	TRBJ2-5*01
CASRYRASNQPQHF	TRBV6-1*01	TRBJ1-5*01
CSVYPTGEVTDTQYF	TRBV29-1*01	TRBJ2-3*01
CASSNTGVSNQPQHF	TRBV12-4*01	TRBJ1-5*01
CASSQGQGGNQPQHF	TRBV4-3*01	TRBJ1-5*01
CASGSGLNSPLHF	TRBV12-5*01	TRBJ1-6*01
CASSYPTGVLSYEQYF	TRBV6-1*01	TRBJ2-7*01
CASKNGAGQNFSPLHF	TRBV7-2*01	TRBJ1-6*01
CASSHKGLEQYF	TRBV3-1*01	TRBJ2-7*01
CASSLSSSNEQFF	TRBV5-6*01	TRBJ2-1*01
CATSPQSGGHDTQYF	TRBV2*01	TRBJ2-3*01
CASRQLTSGSPSNEQFF	TRBV12-4*01	TRBJ2-1*01
CSVVRDEKLFF	TRBV29-1*01	TRBJ1-4*01
CSGRAIGNEQFF	TRBV2*01	TRBJ2-1*01
CASSLVGRTTNEKLFF	TRBV5-1*01	TRBJ1-4*01
CASSPYRGMNTEAFF	TRBV25-1*01	TRBJ1-1*01
CASSQWTGGSSYEQYF	TRBV7-6*01	TRBJ2-7*01
CASRPLKGQHTYEQYF	TRBV5-1*01	TRBJ2-7*01
CASSRDSSETQYF	TRBV12-4*01	TRBJ2-5*01
CASSLGLVDRRAYEQYF	TRBV5-1*01	TRBJ2-7*01
CASSWRQGGLNTEAFF	TRBV11-2*01	TRBJ1-1*01
CSAKLAGVPYEQYF	TRBV20-1*01	TRBJ2-7*01
CASSQDLVNQPQHF	TRBV3-1*01	TRBJ1-5*01
CSARGGEGGSNQPQHF	TRBV20-1*01	TRBJ1-5*01
CASSQDGASGGVETQYF	TRBV4-3*01	TRBJ2-5*01
CASSEASGNTEAFF	TRBV2*01	TRBJ1-1*01
CATGLLGGGEQFF	TRBV27*01	TRBJ2-1*01
CSARDSEREGFNEQFF	TRBV20-1*01	TRBJ2-1*01
CASSHQGLAGAPDTQYF	TRBV4-1*01	TRBJ2-3*01
CASSSERQGDRGYTF	TRBV14*01	TRBJ1-2*01
CASSPLTRAEQFF	TRBV7-6*01	TRBJ2-1*01
CSARVSAGGQETQYF	TRBV20-1*01	TRBJ2-5*01
CSGIDRGSYNEQFF	TRBV29-1*01	TRBJ2-1*01
CASSLTTTGGYTF	TRBV7-9*01	TRBJ1-2*01
CASSLLTFASGGTEAFF	TRBV7-2*01	TRBJ1-1*01
CASSLLVNTEAFF	TRBV27*01	TRBJ1-1*01
CAISEFGDEQFF	TRBV10-3*01	TRBJ2-1*01
CASSPGDTNYEQYF	TRBV3-1*01	TRBJ2-7*01
CASCRRGQYEQYF	TRBV27*01	TRBJ2-7*01
CASSTLSGGDEQYF	TRBV9*01	TRBJ2-7*01
CASTRVGEQFF	TRBV7-2*01	TRBJ2-1*01
CASSLNPGTRSGTQYF	TRBV5-1*01	TRBJ2-5*01
CASRKVSNQPQHF	TRBV19*01	TRBJ1-5*01
CASRPSGSSYEQYF	TRBV28*01	TRBJ2-7*01
CASSGTSGSNEQFF	TRBV11-2*01	TRBJ2-1*01
CSVGTGLYEQYF	TRBV29-1*01	TRBJ2-7*01
CANTSCTETGLYTGELFF	TRBV19*01	TRBJ2-2*01
CASSYGTSVTTGELFF	TRBV12-4*01	TRBJ2-2*01
CASSSYRQVTYEQYF	TRBV6-5*01	TRBJ2-7*01
CSPAGAYNEQFF	TRBV20-1*01	TRBJ2-1*01
CSASNLDYQPQHF	TRBV20-1*01	TRBJ1-5*01
CASSYSPGPGGSGELFF	TRBV6-9*01	TRBJ2-2*01
CASRDLGAAGNTIYF	TRBV7-2*01	TRBJ1-3*01
CASSPGEGLTFTGELFF	TRBV4-2*01	TRBJ2-2*01
CSAFDRSSGNTIYF	TRBV20-1*01	TRBJ1-3*01
CASSGPGLAGGSVYEQYF	TRBV28*01	TRBJ2-7*01
CASGAGWFGQPQHF	TRBV6-5*01	TRBJ1-5*01
CASSYSDTYYGYTF	TRBV6-5*01	TRBJ1-2*01
CASSQPGRVQPQHF	TRBV6-1*01	TRBJ1-5*01
CAAVRQGSNQPQHF	TRBV28*01	TRBJ1-5*01
CASSPRAMTGNTIYF	TRBV12-4*01	TRBJ1-3*01
CASSPTGILYGYTF	TRBV11-2*01	TRBJ1-2*01
CASSSTTGGGKNIQYF	TRBV5-1*01	TRBJ2-4*01
CASSYSSTYNEQFF	TRBV6-5*01	TRBJ2-1*01
CSLGGGANTGELFF	TRBV29-1*01	TRBJ2-2*01
CASTLLAGSSYEQYF	TRBV28*01	TRBJ2-7*01
CASSGGGRTTDTQYF	TRBV12-4*01	TRBJ2-3*01
CASSEWRPEAFF	TRBV2*01	TRBJ1-1*01
CSASPLRGGGTYEQYF	TRBV20-1*01	TRBJ2-7*01
CASSIVGQGDQPQHF	TRBV19*01	TRBJ1-5*01
CASSVSRSDEKLFF	TRBV25-1*01	TRBJ1-4*01
CASSLQGNYSPLHF	TRBV6-1*01	TRBJ1-6*01
CASSKDRVGQPQHF	TRBV6-1*01	TRBJ1-5*01
CASSDGDYQPQHF	TRBV6-4*01	TRBJ1-5*01
CASSQDRQYTEAFF	TRBV3-1*01	TRBJ1-1*01
CASSYNSPGGEETQYF	TRBV27*01	TRBJ2-5*01
CASSVTRSYEQYF	TRBV19*01	TRBJ2-7*01
CSVGQGDAEAFF	TRBV29-1*01	TRBJ1-1*01
CASNRWVNQPQHF	TRBV2*01	TRBJ1-5*01
CASSLAGTSNTGELFF	TRBV12-4*01	TRBJ2-2*01
CASSWGGDTQYF	TRBV12-4*01	TRBJ2-3*01
CASTSYRTRSYNEQFF	TRBV12-4*01	TRBJ2-1*01
CASSFGQGNTIYF	TRBV5-1*01	TRBJ1-3*01
CSVVRDRESYGYTF	TRBV29-1*01	TRBJ1-2*01
CASSEFRSYGYTF	TRBV10-2*01	TRBJ1-2*01
CASSPSGTGSIGNEQFF	TRBV5-5*01	TRBJ2-1*01
CASSVGNLMNTEAFF	TRBV9*01	TRBJ1-1*01
CASSRPWTEIKETQYF	TRBV12-4*01	TRBJ2-5*01
CASTTLAGLAGFVQFF	TRBV6-5*01	TRBJ2-1*01
CASSRRDTQETQYF	TRBV6-1*01	TRBJ2-5*01
CASSPLGAENTEAFF	TRBV4-1*01	TRBJ1-1*01
CSAEQGPDYEQYF	TRBV20-1*01	TRBJ2-7*01
CSVAGQALGEKLFF	TRBV29-1*01	TRBJ1-4*01
CASSLNGRGFYNEQFF	TRBV7-2*01	TRBJ2-1*01
CSVSGRVTDTQYF	TRBV29-1*01	TRBJ2-3*01
CASAAGTGPGNTIYF	TRBV7-2*01	TRBJ1-3*01
CSAPYLAGGGVREQFF	TRBV20-1*01	TRBJ2-1*01
CASRRTTGELFF	TRBV6-1*01	TRBJ2-2*01
CASSPDRAFQETQYF	TRBV9*01	TRBJ2-5*01
CASSQDVGANQPQHF	TRBV4-3*01	TRBJ1-5*01
CASSLLRSYNEQFF	TRBV27*01	TRBJ2-1*01
CASHGAYEGGPFDEQFF	TRBV6-1*01	TRBJ2-1*01
CASSSGGAGEETQYF	TRBV10-2*01	TRBJ2-5*01
CASSPGSGLNSPLHF	TRBV18*01	TRBJ1-6*01
CASSPSLGNTEAFF	TRBV7-9*01	TRBJ1-1*01
CATQMSTDTQYF	TRBV27*01	TRBJ2-3*01
CASSLPSGTYNEQFF	TRBV7-9*01	TRBJ2-1*01
CASSEYGGRTGGQETQYF	TRBV25-1*01	TRBJ2-5*01
CASSLGDSYSTDTQYF	TRBV10-1*01	TRBJ2-3*01
CASSLQVSGANVLTF	TRBV7-3*01	TRBJ2-6*01
CASSPTASSYNSPLHF	TRBV7-6*01	TRBJ1-6*01
CASSFRPDSSQPQHF	TRBV27*01	TRBJ1-5*01
CASRPSGQGSSGYTF	TRBV27*01	TRBJ1-2*01
CSVAHPRDGRRGYTF	TRBV29-1*01	TRBJ1-2*01
CAWATVSYEQYF	TRBV30*01	TRBJ2-7*01
CASSLAGGPDTQYF	TRBV13*01	TRBJ2-3*01
CASSLVVWADHQPQHF	TRBV7-2*01	TRBJ1-5*01
CASSPDGREQFF	TRBV9*01	TRBJ2-1*01
CASSLGIAAFF	TRBV6-1*01	TRBJ1-1*01
CASSGAYEQYF	TRBV13*01	TRBJ2-7*01
CASSLLGEGSFSYGYTF	TRBV12-4*01	TRBJ1-2*01
CSVLGGTPTDTQYF	TRBV29-1*01	TRBJ2-3*01
CASSLAVDRSGANVLTF	TRBV5-1*01	TRBJ2-6*01
CAWSVASYSNQPQHF	TRBV30*01	TRBJ1-5*01
CASSTGPYPEAFF	TRBV12-4*01	TRBJ1-1*01
CASSLAPREIKNIQYF	TRBV12-4*01	TRBJ2-4*01
CASSLVGGQSYEQYF	TRBV5-1*01	TRBJ2-7*01
CASSQGGATNEKLFF	TRBV3-1*01	TRBJ1-4*01
CASSLGPSGYEQYF	TRBV11-2*01	TRBJ2-7*01
CASSLYRGGTDTQYF	TRBV28*01	TRBJ2-3*01
CATSRDYSYGYTF	TRBV15*01	TRBJ1-2*01
CASGLTGEYGEAFF	TRBV12-5*01	TRBJ1-1*01
CASSTAPNQPQHF	TRBV6-5*01	TRBJ1-5*01
CASSQVFASNYGYTF	TRBV3-1*01	TRBJ1-2*01
CASSTGPPMNTEAFF	TRBV18*01	TRBJ1-1*01
CASSQERGGELFF	TRBV5-4*01	TRBJ2-2*01
CASSPLAGVVYEQYF	TRBV6-5*01	TRBJ2-7*01
CSARDPGGTEAFF	TRBV20-1*01	TRBJ1-1*01
CTSSQDLTSAADTQYF	TRBV1*01	TRBJ2-3*01
CASSPLIPQTDTQYF	TRBV7-3*01	TRBJ2-3*01
CASSPAHGEQFF	TRBV6-6*01	TRBJ2-1*01
CASSPLQKETQYF	TRBV18*01	TRBJ2-5*01
CASSLYEAELQNTDTQYF	TRBV4-1*01	TRBJ2-3*01
CASSPQGAATNEKLFF	TRBV6-5*01	TRBJ1-4*01
CASSSGLRNTEAFF	TRBV28*01	TRBJ1-1*01
CASSKYTPRDTQYF	TRBV27*01	TRBJ2-3*01
CASSLSQGGNEQFF	TRBV27*01	TRBJ2-1*01
CSVGSGTVNYGYTF	TRBV29-1*01	TRBJ1-2*01
CASSLGGSNQPQHF	TRBV7-9*01	TRBJ1-5*01
CASSWDRSLYEQYF	TRBV6-5*01	TRBJ2-7*01
CASSWILGQGNQPQHF	TRBV28*01	TRBJ1-5*01
CASSPQVRGQGDEQYF	TRBV18*01	TRBJ2-7*01
CASRQGEETQYF	TRBV7-2*01	TRBJ2-5*01
CATLILDRFGYTF	TRBV19*01	TRBJ1-2*01
CASSTQKGLATSTDTQYF	TRBV27*01	TRBJ2-3*01
CASRENTIYF	TRBV28*01	TRBJ1-3*01
CASSLHPGDQPQHF	TRBV7-7*01	TRBJ1-5*01
CASSGPFSDTQYF	TRBV4-1*01	TRBJ2-3*01
CASSWLGTDSPYEQYF	TRBV28*01	TRBJ2-7*01
CASSSRLAGGLVDTQYF	TRBV13*01	TRBJ2-3*01
CASSLGGPAGVDNEQFF	TRBV11-2*01	TRBJ2-1*01
CASSLVSGRFTEAFF	TRBV5-4*01	TRBJ1-1*01
CASSSDRVNGYTF	TRBV6-1*01	TRBJ1-2*01
CASSRHNSYEQYF	TRBV7-2*01	TRBJ2-7*01
CASSFGGLAQPQHF	TRBV19*01	TRBJ1-5*01
CASRTDRANEQFF	TRBV2*01	TRBJ2-1*01
CASSRQTDTQYF	TRBV3-1*01	TRBJ2-3*01
CASSPGLAGYDTQYF	TRBV5-1*01	TRBJ2-3*01
CSAREEWGTSINEQFF	TRBV20-1*01	TRBJ2-1*01
CASSLTTNEQFF	TRBV7-9*01	TRBJ2-1*01
CSVEGLAGASRYNEQFF	TRBV29-1*01	TRBJ2-1*01
CAISGQSSGNTIYF	TRBV10-3*01	TRBJ1-3*01
CSVAVASYEQYF	TRBV29-1*01	TRBJ2-7*01
CASRLGQGTAKETQYF	TRBV6-6*01	TRBJ2-5*01
CSARDLRRGDSDTQYF	TRBV20-1*01	TRBJ2-3*01
CASSFGGDHSPLHF	TRBV12-4*01	TRBJ1-6*01
CASRREPSADTQYF	TRBV5-1*01	TRBJ2-3*01
CASSLDWETQYF	TRBV5-1*01	TRBJ2-5*01
CASSQSNSYGYTF	TRBV16*01	TRBJ1-2*01
CSVDTGGNTGELFF	TRBV29-1*01	TRBJ2-2*01
CASSQVGYSPLHF	TRBV4-1*01	TRBJ1-6*01
CASSPGQGVEDEQFF	TRBV11-3*01	TRBJ2-1*01
CASSTPPGTGGEAYNEQFF	TRBV6-1*01	TRBJ2-1*01
CSAPWSTGLAGGFPYEQYF	TRBV20-1*01	TRBJ2-7*01
CATSRDWDSYERYTF	TRBV15*01	TRBJ1-2*01
CSVPGWGQETQYF	TRBV29-1*01	TRBJ2-5*01
CSVDSLGRSF	TRBV29-1*01	TRBJ2-1*01
CSVLNPLTGGHWTEAFF	TRBV20-1*01	TRBJ1-1*01
CASSSGGGGPEAFF	TRBV5-5*01	TRBJ1-1*01
CSVEPIGGDYGYTF	TRBV29-1*01	TRBJ1-2*01
CASSQDPDGYEQYF	TRBV4-3*01	TRBJ2-7*01
CASSPTSGGTYEQYF	TRBV7-2*01	TRBJ2-7*01
CASSLGQGAGYF	TRBV12-4*01	TRBJ2-7*01
CASSLAATGRNTEAFF	TRBV7-2*01	TRBJ1-1*01
CASRITGASHGYTF	TRBV27*01	TRBJ1-2*01
CASTTGVEDEQFF	TRBV25-1*01	TRBJ2-1*01
CASSLDRVPSTDTQYF	TRBV7-2*01	TRBJ2-3*01
CASSLQGAGTEAFF	TRBV27*01	TRBJ1-1*01
CASSQEGGRGNQPQHF	TRBV4-1*01	TRBJ1-5*01
CASSLWTTGGDEKLFF	TRBV28*01	TRBJ1-4*01
CASTSWGDSVYF	TRBV27*01	TRBJ2-3*01
CASSLVLGTRNTGELFF	TRBV18*01	TRBJ2-2*01
CASSQDSGNSPLHF	TRBV7-6*01	TRBJ1-6*01
CASSQGVGAQYF	TRBV4-2*01	TRBJ2-3*01
CASSYRPFSKNIQYF	TRBV6-5*01	TRBJ2-4*01
CASSFRAGLDNEQFF	TRBV7-3*01	TRBJ2-1*01
CSARVQRDRTQYF	TRBV20-1*01	TRBJ2-3*01
CSTSPEQGRLFEQYF	TRBV20-1*01	TRBJ2-7*01
CASSDQLGQYNEQFF	TRBV2*01	TRBJ2-1*01
CASSKTVNYGYTF	TRBV27*01	TRBJ1-2*01
CASIDGGGELFF	TRBV21-1*01	TRBJ2-2*01
CSARGGTSGGARETQYF	TRBV20-1*01	TRBJ2-5*01
CASSLGRGQGALKKYF	TRBV7-2*01	TRBJ2-4*01
CSALKGQETQYF	TRBV29-1*01	TRBJ2-5*01
CSVEGSARGAETQYF	TRBV29-1*01	TRBJ2-5*01
CASSGTANTGELFF	TRBV7-2*01	TRBJ2-2*01
CASSLISGGEQFF	TRBV7-3*01	TRBJ2-1*01
CASSLARSETDTQYF	TRBV7-2*01	TRBJ2-3*01
CASSLISGGSYEQFF	TRBV7-2*01	TRBJ2-1*01
CASSGGQGRHTEAFF	TRBV25-1*01	TRBJ1-1*01
CASSAGGGEMAEAFF	TRBV5-4*01	TRBJ1-1*01
CASSQDLSSAYGYTF	TRBV4-2*01	TRBJ1-2*01
CASHPSAGELFF	TRBV28*01	TRBJ2-2*01
CASSFGQQETQYF	TRBV11-1*01	TRBJ2-5*01
CASSLGTRETQYF	TRBV12-4*01	TRBJ2-5*01
CASSQDRGSTDTQYF	TRBV3-1*01	TRBJ2-3*01
CSVEDVETEDF	TRBV29-1*01	TRBJ2-5*01
CASSYPSREQFF	TRBV6-1*01	TRBJ2-1*01
CASSPRTGVYGYTF	TRBV6-1*01	TRBJ1-2*01
CSAKWDTAADTQYF	TRBV20-1*01	TRBJ2-3*01
CASRLRDEGNQPQHF	TRBV6-5*01	TRBJ1-5*01
CASSQEGQGEADTIYF	TRBV4-2*01	TRBJ1-3*01
CASSSRTGSPTDTQYF	TRBV7-9*01	TRBJ2-3*01
CASSLSLAGGLRVEQYF	TRBV12-4*01	TRBJ2-7*01
CATSDPAGADTEAFF	TRBV24-1*01	TRBJ1-1*01
CASSQGGSRGSPLHF	TRBV4-3*01	TRBJ1-6*01
CASSFTLTDTQYF	TRBV7-3*01	TRBJ2-3*01
CASSYRDSLEQFF	TRBV6-5*01	TRBJ2-1*01
CASSADYTDTQYF	TRBV2*01	TRBJ2-3*01
CASSTAHTTGSKNIQYF	TRBV12-4*01	TRBJ2-4*01
CASSLRSSGGAGTDTQYF	TRBV27*01	TRBJ2-3*01
CAWSTLQGSSGYTF	TRBV30*01	TRBJ1-2*01
CASTLGQGGQETQYF	TRBV5-5*01	TRBJ2-5*01
CASSPGIQETQYF	TRBV18*01	TRBJ2-5*01
CASRGTGLNTEAFF	TRBV28*01	TRBJ1-1*01
CASSLIGRRSIYTIYF	TRBV28*01	TRBJ1-3*01
CASSAVGQGASDTQYF	TRBV9*01	TRBJ2-3*01
CASTLKRDYSNQPQHF	TRBV6-5*01	TRBJ1-5*01
CASSHHFSGANVLTF	TRBV6-1*01	TRBJ2-6*01
CASRAGTGSSYEQYF	TRBV10-2*01	TRBJ2-7*01
CAISRDGNTEAFF	TRBV10-3*01	TRBJ1-1*01
CATGADRRSYNSPLHF	TRBV15*01	TRBJ1-6*01
CASSSDRPNTEAFF	TRBV5-4*01	TRBJ1-1*01
CSVEGPGLAKNIQYF	TRBV29-1*01	TRBJ2-4*01
CASSPGVPNQPQHF	TRBV7-3*01	TRBJ1-5*01
CATRPTAGTGGVQPQHF	TRBV24-1*01	TRBJ1-5*01
CASSGTGEITDTQYF	TRBV6-4*01	TRBJ2-3*01
CSAWPGLAGAEQYF	TRBV20-1*01	TRBJ2-7*01
CASSLAPGLAGGETQYF	TRBV12-4*01	TRBJ2-5*01
CSARDFGWVGEQYF	TRBV20-1*01	TRBJ2-7*01
CASSLGDWSEQFF	TRBV12-4*01	TRBJ2-1*01
CASSLDVGRGNEQFF	TRBV5-6*01	TRBJ2-1*01
CASSPGALGNQPQHF	TRBV7-2*01	TRBJ1-5*01
CASSSGPGEYKGQYF	TRBV28*01	TRBJ2-7*01
CASSPGTVDTEAFF	TRBV18*01	TRBJ1-1*01
CASSSERSRRSNQPQHF	TRBV7-2*01	TRBJ1-5*01
CASSFGLLYNEQFF	TRBV11-1*01	TRBJ2-1*01
CATSDPTTDTQYF	TRBV24-1*01	TRBJ2-3*01
CSVQASDRGLEKNTQYF	TRBV29-1*01	TRBJ2-3*01
CASSRDKTGPQYF	TRBV12-4*01	TRBJ2-5*01
CASSFSGSNEKLFF	TRBV7-9*01	TRBJ1-4*01
CSVHRQGGYNEQFF	TRBV29-1*01	TRBJ2-1*01
CASSDSGNQPQHF	TRBV6-4*01	TRBJ1-5*01
CASSLGGTGDYEQYF	TRBV7-6*01	TRBJ2-7*01
CASGPGRFSSTEAFF	TRBV25-1*01	TRBJ1-1*01
CASTPDETSGTTDEQFF	TRBV21-1*01	TRBJ2-1*01
CSATRQYNQPQHF	TRBV20-1*01	TRBJ1-5*01
CSARPDNGGTEAFF	TRBV20-1*01	TRBJ1-1*01
CASTRLFAGDVVYYEQYF	TRBV27*01	TRBJ2-7*01
CASRYGGGNSPLHF	TRBV6-1*01	TRBJ1-6*01
CASSPGAGTTKFTDTQYF	TRBV14*01	TRBJ2-3*01
CSARDSGGADTGELFF	TRBV20-1*01	TRBJ2-2*01
CSASPQVDQPQHF	TRBV20-1*01	TRBJ1-5*01
CASSYGQRRVGGTGELFF	TRBV6-9*01	TRBJ2-2*01
CASTNVAFATDTQYF	TRBV12-4*01	TRBJ2-3*01
CASSPGLLSTDTQYF	TRBV7-9*01	TRBJ2-3*01
CASSYQRGSYNEQFF	TRBV6-5*01	TRBJ2-1*01
CASSLAPTGDIQYF	TRBV11-1*01	TRBJ2-4*01
CATKGPSANGFYYEQYF	TRBV24-1*01	TRBJ2-7*01
CASRTQGQETQYF	TRBV27*01	TRBJ2-5*01
CASSQVAGSSYNEQFF	TRBV4-3*01	TRBJ2-1*01
CASRDYGYTF	TRBV28*01	TRBJ1-2*01
CASSLVSTFELFF	TRBV11-2*01	TRBJ2-2*01
CASSLTGYSNQPQHF	TRBV5-6*01	TRBJ1-5*01
CSVGGGTGRTGELFF	TRBV29-1*01	TRBJ2-2*01
CASSSGTGVQPQHF	TRBV2*01	TRBJ1-5*01
CASSQDIDTQYF	TRBV4-2*01	TRBJ2-3*01
CASSSRGNQETQYF	TRBV5-1*01	TRBJ2-5*01
CAIRTQGSNSPLHF	TRBV10-3*01	TRBJ1-6*01
CASSELVARLNEQFF	TRBV2*01	TRBJ2-1*01
CASSYEGATHNEQFF	TRBV6-5*01	TRBJ2-1*01
CASSVGLAGNNEQFF	TRBV9*01	TRBJ2-1*01
CASSPDRSSGANVLTF	TRBV11-2*01	TRBJ2-6*01
CASSLNRGPADTQYF	TRBV6-5*01	TRBJ2-3*01
CASSPGRDRPFTAFF	TRBV6-9*01	TRBJ1-1*01
CASSLGANVLTF	TRBV6-1*01	TRBJ2-6*01
CASIFGDSNTGELFF	TRBV6-6*01	TRBJ2-2*01
CASSFHPGPYEQYF	TRBV27*01	TRBJ2-7*01
CASSLDRRNSPLHF	TRBV9*01	TRBJ1-6*01
CASSLDDRQTQYF	TRBV11-2*01	TRBJ2-5*01
CSGTGRGEKLFF	TRBV20-1*01	TRBJ1-4*01
CASSPVGSYGYTF	TRBV6-5*01	TRBJ1-2*01
CASSPIFQQFF	TRBV11-2*01	TRBJ2-1*01
CASSLGFGVQETQYF	TRBV11-2*01	TRBJ2-5*01
CASSSTDAVAGPYNEQFF	TRBV5-5*01	TRBJ2-1*01
CASGPGTLGEQYF	TRBV12-4*01	TRBJ2-7*01
CASTDMEREGYEQYF	TRBV5-4*01	TRBJ2-7*01
CSAFRGGRETQYF	TRBV20-1*01	TRBJ2-5*01
CASRYQGVGQPQHF	TRBV27*01	TRBJ1-5*01
CATSTSLATQYF	TRBV12-4*01	TRBJ2-3*01
CASSSGQVGYGYTF	TRBV28*01	TRBJ1-2*01
CSARRQGEGTDTQYF	TRBV20-1*01	TRBJ2-3*01
CASSTSGSISYEQYF	TRBV6-6*01	TRBJ2-7*01
CASSPRGSRDTEAFF	TRBV21-1*01	TRBJ1-1*01
CASSIAGGQYNEQFF	TRBV5-5*01	TRBJ2-1*01
CASSQETGHSIYF	TRBV4-1*01	TRBJ1-3*01
CASSRGQGANYGYTF	TRBV7-2*01	TRBJ1-2*01
CASSYSPSGGNYGYTF	TRBV7-2*01	TRBJ1-2*01
CSARAGLAGPSTDTQYF	TRBV20-1*01	TRBJ2-3*01
CASSQDLDGRGSETQYF	TRBV3-1*01	TRBJ2-5*01
CASSLGQPQHF	TRBV28*01	TRBJ1-5*01
CASSLGTGTEAFF	TRBV7-3*01	TRBJ1-1*01
CASSLGISNQPQHF	TRBV7-2*01	TRBJ1-5*01
CASSQAVDQIVETQYF	TRBV5-1*01	TRBJ2-5*01
CSARIAGGVNEQFF	TRBV20-1*01	TRBJ2-1*01
CASSPFEIGYTF	TRBV18*01	TRBJ1-2*01
CSVIAGLAYNEQFF	TRBV29-1*01	TRBJ2-1*01
CASRQGGLNEQFF	TRBV27*01	TRBJ2-1*01
CSVEVGSEAFF	TRBV29-1*01	TRBJ1-1*01
CASSPRAENNEQFF	TRBV7-8*01	TRBJ2-1*01
CASSQDSQGGIGAPLHF	TRBV4-2*01	TRBJ1-6*01
CASSPGDRGFTEAFF	TRBV5-1*01	TRBJ1-1*01
CASSSGLAVTQETQYF	TRBV7-6*01	TRBJ2-5*01
CASRYLTGATTNQPQHF	TRBV6-6*01	TRBJ1-5*01
CASSLGGAYGYTF	TRBV12-4*01	TRBJ1-2*01
CASSPGHLEGQPQHF	TRBV9*01	TRBJ1-5*01
CASSRSGAGQPQHF	TRBV3-1*01	TRBJ1-5*01
CASSFWRQGNTEAFF	TRBV12-4*01	TRBJ1-1*01
CASKRWYGGNNYGYTF	TRBV7-9*01	TRBJ1-2*01
CASSTGTSGSSDTQYF	TRBV21-1*01	TRBJ2-3*01
CASSHGTSANEQFF	TRBV7-3*01	TRBJ2-1*01
CASSLSGPHSPLHF	TRBV7-3*01	TRBJ1-6*01
CASSRPTGYEQYF	TRBV6-5*01	TRBJ2-7*01
CASRDPQGYFGEQFF	TRBV6-1*01	TRBJ2-1*01
CASSFGYSNQPQHF	TRBV12-4*01	TRBJ1-5*01
CASSPQGYQPQHF	TRBV27*01	TRBJ1-5*01
CASSLQPYYGYTF	TRBV27*01	TRBJ1-2*01
CASSLRGGYQETQYF	TRBV7-3*01	TRBJ2-5*01
CASSEGLAGQYF	TRBV12-4*01	TRBJ2-3*01
CASSPTGNNNSPLHF	TRBV7-2*01	TRBJ1-6*01
CASSDRPVGSAGEKLFF	TRBV6-4*01	TRBJ1-4*01
CSADPPQGLIDGYTF	TRBV20-1*01	TRBJ1-2*01
CASSSGGYGYTF	TRBV12-4*01	TRBJ1-2*01
CSVVANTGELFF	TRBV29-1*01	TRBJ2-2*01
CASRDSGADTQYF	TRBV7-3*01	TRBJ2-3*01
CASRGQVILAKNIQYF	TRBV6-6*01	TRBJ2-4*01
CASSFEGTANEKLFF	TRBV28*01	TRBJ1-4*01
CFARGRAGGISYEQYF	TRBV20-1*01	TRBJ2-7*01
CASSRDRGSRQETQYF	TRBV5-8*01	TRBJ2-5*01
CASSSSGQGWDEQYF	TRBV6-1*01	TRBJ2-7*01
CASSPKPGLRRAGELFF	TRBV4-3*01	TRBJ2-2*01
CASSPGLAGDNEQFF	TRBV5-1*01	TRBJ2-1*01
CASSWGEGQPQHF	TRBV7-3*01	TRBJ1-5*01
CASSPPSGGYTF	TRBV28*01	TRBJ1-2*01
CASINDREAEYEQYF	TRBV6-1*01	TRBJ2-7*01
CASSSVYSNQPQHF	TRBV19*01	TRBJ1-5*01
CASRAYVKIGLF	TRBV2*01	TRBJ2-7*01
CSVEGPEKLFF	TRBV29-1*01	TRBJ1-4*01
CASSPQTSSASGYNEQFF	TRBV18*01	TRBJ2-1*01
CASSLLPVLSSYNSPLHF	TRBV12-4*01	TRBJ1-6*01
CSAREGLRDTQYF	TRBV20-1*01	TRBJ2-3*01
CASSVSSGSRYF	TRBV28*01	TRBJ2-5*01
CSVEGSRYSGGTDTQYF	TRBV29-1*01	TRBJ2-3*01
CASSPNAPDRNQPQHF	TRBV7-2*01	TRBJ1-5*01
CASSYSRGNNEKLFF	TRBV6-6*01	TRBJ1-4*01
CAWSFGQNSNQPQHF	TRBV30*01	TRBJ1-5*01
CASSVGGGPNTEAFF	TRBV9*01	TRBJ1-1*01
CASSYSLGTGGETQYF	TRBV6-1*01	TRBJ2-5*01
CASRVRSHSNQPQHF	TRBV27*01	TRBJ1-5*01
CSDEETQYF	TRBV29-1*01	TRBJ2-5*01
CASSIQSGANVLTF	TRBV19*01	TRBJ2-6*01
CSADRGGYTEAFF	TRBV29-1*01	TRBJ1-1*01
CASSYSRQGGGYTF	TRBV6-5*01	TRBJ1-2*01
CASSFGRHTEAFF	TRBV12-4*01	TRBJ1-1*01
CSATSGGRDQPQHF	TRBV20-1*01	TRBJ1-5*01
CASSLVGQANSPLHF	TRBV7-9*01	TRBJ1-6*01
CASSLLGTGASYGYTF	TRBV7-8*01	TRBJ1-2*01
CASSSGSLSYEQYF	TRBV28*01	TRBJ2-7*01
CASSVPGDREKLFF	TRBV25-1*01	TRBJ1-4*01
CASSRTTYYEQYF	TRBV3-1*01	TRBJ2-7*01
CASSLDVADRWTGELFF	TRBV11-2*01	TRBJ2-2*01
CASSQVHNEQFF	TRBV3-1*01	TRBJ2-1*01
CASVLGGEPQHF	TRBV6-9*01	TRBJ1-5*01
CASSPFGTEAFF	TRBV7-2*01	TRBJ1-1*01
CASSLETTDTQYF	TRBV7-9*01	TRBJ2-3*01
CASSLRGIETQYF	TRBV11-3*01	TRBJ2-5*01
CASPLGPRRRQYF	TRBV2*01	TRBJ2-3*01
CASSPREGATGAFF	TRBV5-4*01	TRBJ1-1*01
CASSPEERSRQFF	TRBV7-2*01	TRBJ2-1*01
CASSLAGAGNTIYF	TRBV12-4*01	TRBJ1-3*01
CASSLIGNYEQYF	TRBV12-4*01	TRBJ2-7*01
CASSLEPNNEKLFF	TRBV2*01	TRBJ1-4*01
CASSRQGAESTNEKLFF	TRBV7-9*01	TRBJ1-4*01
CSVAGTGQETQYF	TRBV29-1*01	TRBJ2-5*01
CASSQEERYGYTF	TRBV3-1*01	TRBJ1-2*01
CASSLLAGGTDTQYF	TRBV2*01	TRBJ2-3*01
CATSKGQGYEQFF	TRBV15*01	TRBJ2-1*01
CASSSAQGAHYEQYF	TRBV27*01	TRBJ2-7*01
CATRGHMNTEAFF	TRBV24-1*01	TRBJ1-1*01
CASSPVAGAGSPLHF	TRBV11-1*01	TRBJ1-6*01
CASSHSDPGTGGEKLFF	TRBV4-2*01	TRBJ1-4*01
CSASSPGGFNEQFF	TRBV20-1*01	TRBJ2-1*01
CAIRSSTSGRRWEQFF	TRBV10-3*01	TRBJ2-1*01
CASSPETWTGRIHGYTF	TRBV28*01	TRBJ1-2*01
CASSQVTSGRSYNEQFF	TRBV14*01	TRBJ2-1*01
CSASPGGSGNTIYF	TRBV29-1*01	TRBJ1-3*01
CATSRDRDRMNTEAFF	TRBV15*01	TRBJ1-1*01
CASSPGLAGGLTDTQYF	TRBV7-8*01	TRBJ2-3*01
CASSQQQGLNTEAFF	TRBV4-1*01	TRBJ1-1*01
CASSPGQASNTEAFF	TRBV7-6*01	TRBJ1-1*01
CASATGTLNSPLHF	TRBV27*01	TRBJ1-6*01
CASSTGTSGVTDTQYF	TRBV5-1*01	TRBJ2-3*01
CASRGGFNEQFF	TRBV12-4*01	TRBJ2-1*01
CSARVARGYTDTQYF	TRBV20-1*01	TRBJ2-3*01
CASMLRQGLNEKLFF	TRBV7-9*01	TRBJ1-4*01
CASRARDRGRDEQFF	TRBV28*01	TRBJ2-1*01
CASSPPLLNTEAFF	TRBV18*01	TRBJ1-1*01
CASSLFGDEKLFF	TRBV27*01	TRBJ1-4*01
CASGSRQGQRGQETQYF	TRBV10-2*01	TRBJ2-5*01
CASSDNDRVTEAFF	TRBV6-5*01	TRBJ1-1*01
CSVAAPEGYGYTF	TRBV29-1*01	TRBJ1-2*01
CASSDSTSGGHNTGELFF	TRBV6-4*01	TRBJ2-2*01
CASSYWSRGYNEQFF	TRBV6-1*01	TRBJ2-1*01
CASSPGRADTQYF	TRBV4-1*01	TRBJ2-3*01
CSVDRSQETQYF	TRBV29-1*01	TRBJ2-5*01
CASSSGDRGADTQYF	TRBV7-3*01	TRBJ2-3*01
CSANYYGSSEQYF	TRBV20-1*01	TRBJ2-7*01
CASSYQVGNQPQHF	TRBV6-1*01	TRBJ1-5*01
CASSLLGGTGLSEQYF	TRBV7-3*01	TRBJ2-7*01
CAISGGDRGRRGYTF	TRBV10-3*01	TRBJ1-2*01
CASSLRDPGELFF	TRBV7-2*01	TRBJ2-2*01
CAISDFSYEQYF	TRBV10-3*01	TRBJ2-7*01
CASSQDGQGKAFF	TRBV4-2*01	TRBJ1-1*01
CASSPGTGLSPLHF	TRBV13*01	TRBJ1-6*01
CSAETSGSSGFNEQFF	TRBV20-1*01	TRBJ2-1*01
CSALSPDNEQFF	TRBV20-1*01	TRBJ2-1*01
CASGSGGENTEAFF	TRBV12-4*01	TRBJ1-1*01
CATQSGAGGTTGELFF	TRBV6-5*01	TRBJ2-2*01
CSVGGAGGNQPQHF	TRBV29-1*01	TRBJ1-5*01
CASRDLISGSHYEQYF	TRBV3-1*01	TRBJ2-7*01
CASSQDGELAGANVLTF	TRBV4-2*01	TRBJ2-6*01
CSARSGRETQYF	TRBV20-1*01	TRBJ2-5*01
CASSVMGGTNEKLFF	TRBV9*01	TRBJ1-4*01
CASSPTGYGYTF	TRBV7-2*01	TRBJ1-2*01
CASSQGGGGLETQYF	TRBV4-2*01	TRBJ2-5*01
CASSQIRLAGGHDTQYF	TRBV7-9*01	TRBJ2-3*01
CASSQEESGTNYGYTF	TRBV4-2*01	TRBJ1-2*01
CASSTYRGRPSYEQYF	TRBV5-1*01	TRBJ2-7*01
CASSYGGLGNQPQHF	TRBV6-5*01	TRBJ1-5*01
CASSLSSRPRVGANVLTF	TRBV27*01	TRBJ2-6*01
CASTKLGTGAYEQYF	TRBV6-5*01	TRBJ2-7*01
CASSQEVSSSYEQYF	TRBV4-3*01	TRBJ2-7*01
CASSSPGTGGYNEQFF	TRBV19*01	TRBJ2-1*01
CASSYPGRSNQPQHF	TRBV12-4*01	TRBJ1-5*01
CASSPKLGSGRSAKNIQYF	TRBV7-9*01	TRBJ2-4*01
CASRYRGLTEAFF	TRBV6-1*01	TRBJ1-1*01
CASSLKAGGGYEQYF	TRBV7-2*01	TRBJ2-7*01
CASSLAGKLTDTQYF	TRBV5-1*01	TRBJ2-3*01
CASSSGPSGKGSEQYF	TRBV7-9*01	TRBJ2-7*01
CASSLRGVQETQYF	TRBV12-4*01	TRBJ2-5*01
CASSYSPAYEQYF	TRBV6-1*01	TRBJ2-7*01
CSARGANVLTF	TRBV20-1*01	TRBJ2-6*01
CSAVDRINGNQPQHF	TRBV20-1*01	TRBJ1-5*01
CASSDSYEQYF	TRBV25-1*01	TRBJ2-7*01
CASSYSGSMNTEAFF	TRBV6-1*01	TRBJ1-1*01
CASRRGPYSNQPQHF	TRBV12-4*01	TRBJ1-5*01
CASSLRQGNSPLHF	TRBV7-2*01	TRBJ1-6*01
CASSPGQGAYNSPLHF	TRBV6-6*01	TRBJ1-6*01
CASSSRRGDTQYF	TRBV27*01	TRBJ2-3*01
CSAPGLGVETQYF	TRBV20-1*01	TRBJ2-5*01
CASSPSGTDSPLHF	TRBV3-1*01	TRBJ1-6*01
CASSESPVSGNTIYF	TRBV2*01	TRBJ1-3*01
CASSYSGTGRTDTQYF	TRBV6-5*01	TRBJ2-3*01
CASSVRWGGGFTDTQYF	TRBV25-1*01	TRBJ2-3*01
CASSQDRGNQPQHF	TRBV4-2*01	TRBJ1-5*01
CASSFPGGYGYTF	TRBV12-4*01	TRBJ1-2*01
CSVRLPRHSGANVLTF	TRBV29-1*01	TRBJ2-6*01
CATSRDLPGPSYEQYF	TRBV15*01	TRBJ2-7*01
CASSAGTVNTGELFF	TRBV5-1*01	TRBJ2-2*01
CASSFSSYEQYF	TRBV5-1*01	TRBJ2-7*01
CRGPGEQFF	TRBV2*01	TRBJ2-1*01
CASSFFSGTRNEQFF	TRBV12-4*01	TRBJ2-1*01
CASGTGGDEQFF	TRBV5-1*01	TRBJ2-1*01
CASSVDRLASRGEQFF	TRBV9*01	TRBJ2-1*01
CASVTGAAHTEAFF	TRBV28*01	TRBJ1-1*01
CASSYSGVGVGNTIYF	TRBV6-6*01	TRBJ1-3*01
CSAAAASSGNTIYF	TRBV20-1*01	TRBJ1-3*01
CASSLVGELESGELFF	TRBV7-8*01	TRBJ2-2*01
CASSARRRTNYGYTF	TRBV9*01	TRBJ1-2*01
CASSPTSGNPTSTDTQYF	TRBV9*01	TRBJ2-3*01
CASSQDLSPSYGYTF	TRBV3-1*01	TRBJ1-2*01
CASSQDAVSGGTYNEQFF	TRBV4-3*01	TRBJ2-1*01
CASSKGLADYNEQFF	TRBV5-1*01	TRBJ2-1*01
CASSKGGDRGHEQYF	TRBV7-9*01	TRBJ2-7*01
CASSWMTDTQYF	TRBV5-1*01	TRBJ2-3*01
CASSPGGGSYNSPLHF	TRBV28*01	TRBJ1-6*01
CSAGQGSQPQHF	TRBV20-1*01	TRBJ1-5*01
CASSQAEARDEQFF	TRBV4-2*01	TRBJ2-1*01
CASSLKRSTGSNEKLFF	TRBV11-2*01	TRBJ1-4*01
CASSAYGAGGTDTQYF	TRBV7-8*01	TRBJ2-3*01
CASSSLYRGRVNTEAFF	TRBV27*01	TRBJ1-1*01
CASSLMDGNTEAFF	TRBV7-9*01	TRBJ1-1*01
CASSLPGQGKYGYTF	TRBV5-1*01	TRBJ1-2*01
CASSQAGSRYGYTF	TRBV27*01	TRBJ1-2*01
CATSRDPEATTNEKLFF	TRBV15*01	TRBJ1-4*01
CASSLAPISGRYEQYF	TRBV5-1*01	TRBJ2-7*01
CASSRGSNQPQHF	TRBV6-1*01	TRBJ1-5*01
CASSLMGQGDSPLHF	TRBV5-1*01	TRBJ1-6*01
CASSSRTGGTEAFF	TRBV6-6*01	TRBJ1-1*01
CASRRDSLDYGYTF	TRBV19*01	TRBJ1-2*01
CASSQGILINYGYTF	TRBV5-1*01	TRBJ1-2*01
CSARVHGGTNEKLFF	TRBV20-1*01	TRBJ1-4*01
CASGRTGGYYEQYF	TRBV7-9*01	TRBJ2-7*01
CASIGTDTQYF	TRBV28*01	TRBJ2-3*01
CASTSARTADTEAFF	TRBV5-1*01	TRBJ1-1*01
CASSLATGSSGNTIYF	TRBV7-9*01	TRBJ1-3*01
CASSQEQGRRTEAFF	TRBV3-1*01	TRBJ1-1*01
CASSYCPCKGKKLFF	TRBV6-9*01	TRBJ1-4*01
CSARDLSPPRGSAQYF	TRBV20-1*01	TRBJ2-5*01
CASSFEAPYEQYF	TRBV28*01	TRBJ2-7*01
CASSPGGGTEAFF	TRBV3-1*01	TRBJ1-1*01
CASSDSHNQPQHF	TRBV2*01	TRBJ1-5*01
CASSRGGAWSYEQYF	TRBV3-1*01	TRBJ2-7*01
CASSTTPATNYGYTF	TRBV7-2*01	TRBJ1-2*01
CASSQGSGENTGELFF	TRBV4-2*01	TRBJ2-2*01
CASSTKTGTGELFF	TRBV5-4*01	TRBJ2-2*01
CASRGTQGPRDTQYF	TRBV6-1*01	TRBJ2-3*01
CSVEGDTGPGELFF	TRBV29-1*01	TRBJ2-2*01
CASSQAQHNEQFF	TRBV14*01	TRBJ2-1*01
CASSLGGNELFF	TRBV12-4*01	TRBJ1-4*01
CASSPTAYSNQPQHF	TRBV7-2*01	TRBJ1-5*01
CSVVRDLTGTDTQYF	TRBV29-1*01	TRBJ2-3*01
CASSYRRQGRRNQPQHF	TRBV6-1*01	TRBJ1-5*01
CASSYQDRGMDQPQHF	TRBV6-1*01	TRBJ1-5*01
CATSDGLSNQPQHF	TRBV24-1*01	TRBJ1-5*01
CSARTPGGGETQYF	TRBV20-1*01	TRBJ2-5*01
CASSVGRHEQFF	TRBV9*01	TRBJ2-1*01
CASSLRRGSSYNEQFF	TRBV7-3*01	TRBJ2-1*01
CSVTGTGGLGQETQYF	TRBV29-1*01	TRBJ2-5*01
CASTALGSFQETQYF	TRBV6-6*01	TRBJ2-5*01
CASSQDTGITEAFF	TRBV14*01	TRBJ1-1*01
CASSLGSENYGYTF	TRBV7-8*01	TRBJ1-2*01
CSARNPGQGVGTEAFF	TRBV20-1*01	TRBJ1-1*01
CATSDLLGYEQYF	TRBV24-1*01	TRBJ2-7*01
CASSPPGQPQHF	TRBV6-5*01	TRBJ1-5*01
CASSPYRGAYDSNYGYTF	TRBV4-1*01	TRBJ1-2*01
CASSQRRGLLNSPLHF	TRBV4-2*01	TRBJ1-6*01
CSVDKGNQETQYF	TRBV29-1*01	TRBJ2-5*01
CASSQGAGSNQPQHF	TRBV4-3*01	TRBJ1-5*01
CSVPPVGRGNTEAFF	TRBV29-1*01	TRBJ1-1*01
CASSSGALRGNEQFF	TRBV6-5*01	TRBJ2-1*01
CAVLGQGLGAFF	TRBV2*01	TRBJ1-1*01
CASSLGVGGRTEAFF	TRBV7-6*01	TRBJ1-1*01
CASTRTGTHVAFF	TRBV12-4*01	TRBJ1-1*01
CASRGQGGTEAFF	TRBV3-1*01	TRBJ1-1*01
CASSSRGPRGSSPLHF	TRBV6-5*01	TRBJ1-6*01
CASSVGQSYEQYF	TRBV9*01	TRBJ2-7*01
CASSGGTSGTNEQFF	TRBV6-4*01	TRBJ2-1*01
CASSRSGGAGTQYF	TRBV12-4*01	TRBJ2-5*01
CASSLGQGTSNQPQHF	TRBV7-6*01	TRBJ1-5*01
CSARLDYEKLFF	TRBV20-1*01	TRBJ1-4*01
CASSEAKDRLTGNTIYF	TRBV6-1*01	TRBJ1-3*01
CASSSRGSSYNEQFF	TRBV7-2*01	TRBJ2-1*01
CASSPGQGISEQYF	TRBV6-5*01	TRBJ2-7*01
CSARPSGGYNEEFF	TRBV20-1*01	TRBJ2-1*01
CSVVAYNEQFF	TRBV29-1*01	TRBJ2-1*01
CSVEPLAGGPNEQFF	TRBV29-1*01	TRBJ2-1*01
CASTRVPGLGLSTGELFF	TRBV10-2*01	TRBJ2-2*01
CASSAKQGTEAFF	TRBV3-1*01	TRBJ1-1*01
CASSVGSYNEQFF	TRBV2*01	TRBJ2-1*01
CSARDLTSGRSVDTQYF	TRBV20-1*01	TRBJ2-3*01
CASSPDRTGSGNYGYTF	TRBV4-3*01	TRBJ1-2*01
CASSLGTGLAFF	TRBV28*01	TRBJ1-1*01
CASRGVYTDTQYF	TRBV25-1*01	TRBJ2-3*01
CASSPPDRANEQYF	TRBV6-6*01	TRBJ2-7*01
CSVEIPGSGAETQYF	TRBV29-1*01	TRBJ2-5*01
CASSLAGGDDEQYF	TRBV19*01	TRBJ2-7*01
CSAPALAGSYEQYF	TRBV20-1*01	TRBJ2-7*01
CASRRGGANTEAFF	TRBV6-5*01	TRBJ1-1*01
CASSRRGAYEQYF	TRBV14*01	TRBJ2-7*01
CASSNTNTGELFF	TRBV27*01	TRBJ2-2*01
CSATTRGAQYF	TRBV20-1*01	TRBJ2-5*01
CASSPPGTDTQYF	TRBV3-1*01	TRBJ2-3*01
CASSPLTVDNEQFF	TRBV5-1*01	TRBJ2-1*01
CASSLPDRGATEAFF	TRBV28*01	TRBJ1-1*01
CASSWDSYNEQFF	TRBV7-9*01	TRBJ2-1*01
CAWAFAGPSYTF	TRBV30*01	TRBJ1-2*01
CASSPSVPSYEQYF	TRBV11-2*01	TRBJ2-7*01
CASSLLGAEQYF	TRBV28*01	TRBJ2-7*01
CASSIRQGRRPNEQFF	TRBV6-4*01	TRBJ2-1*01
CASGPPVSRGHEQFF	TRBV12-5*01	TRBJ2-1*01
CAWRNSFLSYNSPLHF	TRBV30*01	TRBJ1-6*01
CSAVDGGQSHQPQHF	TRBV20-1*01	TRBJ1-5*01
CASSQGEGLGIF	TRBV7-9*01	TRBJ2-1*01
CASSRLGTYEQYF	TRBV4-1*01	TRBJ2-7*01
CASSSLYGYEQYF	TRBV7-2*01	TRBJ2-7*01
CASSLGGVSYNEQFF	TRBV4-3*01	TRBJ2-1*01
CASSLFGGAKGNEQFF	TRBV11-3*01	TRBJ2-1*01
CASRLRGLGDTQYF	TRBV2*01	TRBJ2-3*01
CASSLDGSRLYGYTF	TRBV7-2*01	TRBJ1-2*01
CASSQQGTRRIYNEQFF	TRBV14*01	TRBJ2-1*01
CASSSHPGSNYGYTF	TRBV5-4*01	TRBJ1-2*01
CASSVSTQGETQYF	TRBV9*01	TRBJ2-5*01
CASSLERGGSNQPQHF	TRBV12-4*01	TRBJ1-5*01
CASSRTGLFSPQHF	TRBV6-5*01	TRBJ1-5*01
CASRPADSFEAFF	TRBV7-9*01	TRBJ1-1*01
CASSPNSGQSSYEQYF	TRBV5-5*01	TRBJ2-7*01
CASSLDRMNTEAFF	TRBV5-4*01	TRBJ1-1*01
CSVVLAGDEQFF	TRBV29-1*01	TRBJ2-1*01
CASTASAGTGANEQFF	TRBV6-4*01	TRBJ2-1*01
CASSPPGSTDTQYF	TRBV5-1*01	TRBJ2-3*01
CATSDLNGNQPQHF	TRBV24-1*01	TRBJ1-5*01
CASSLSPGLAVRNEQFF	TRBV5-6*01	TRBJ2-1*01
CASSVAVSGVYEQYF	TRBV9*01	TRBJ2-7*01
CASSRGAAGLSGANVLTF	TRBV4-3*01	TRBJ2-6*01
CASFPGQVAQYF	TRBV6-1*01	TRBJ2-7*01
CSAGTSGSGDEQFF	TRBV20-1*01	TRBJ2-1*01
CSGVALGPGQGGSNEKLFF	TRBV29-1*01	TRBJ1-4*01
CASSPSGEAAYEQFF	TRBV12-4*01	TRBJ2-1*01
CASSQADTQYF	TRBV4-1*01	TRBJ2-3*01
CASSRGLTDTQYF	TRBV3-1*01	TRBJ2-3*01
CASSPEPHQGFF	TRBV7-9*01	TRBJ2-1*01
CASSRSYTGEEQYF	TRBV18*01	TRBJ2-7*01
CASSTPTGNQHF	TRBV28*01	TRBJ1-5*01
CATSDQGQGATTGELFF	TRBV24-1*01	TRBJ2-2*01
CASSSSRQGRHSPLHF	TRBV5-5*01	TRBJ1-6*01
CASSYSARGRDEQFF	TRBV6-1*01	TRBJ2-1*01
CASSLPGLAGGRGDTQYF	TRBV28*01	TRBJ2-3*01
CASSLAAGDRANTEAFF	TRBV7-6*01	TRBJ1-1*01
CASSLVALTGGTDTQYF	TRBV7-2*01	TRBJ2-3*01
CSVIPGQLNTEAFF	TRBV29-1*01	TRBJ1-1*01
CSARNASLNTIYF	TRBV20-1*01	TRBJ1-3*01
CASSLTGREAFF	TRBV3-1*01	TRBJ1-1*01
CATSDGTGVLGTDTQYF	TRBV24-1*01	TRBJ2-3*01
CASSPGQGGTGELFF	TRBV6-6*01	TRBJ2-2*01
CASSPGQGAKNIQYF	TRBV6-5*01	TRBJ2-4*01
CASSFSGRAKTQYF	TRBV11-2*01	TRBJ2-5*01
CASRMGQDYEQYF	TRBV7-9*01	TRBJ2-7*01
CASSVAGGLTGANVLTF	TRBV9*01	TRBJ2-6*01
CASSIMASGSYEQYF	TRBV19*01	TRBJ2-7*01
CASSFPRDSATYEQYF	TRBV28*01	TRBJ2-7*01
CSARVGKYSNQPQHF	TRBV20-1*01	TRBJ1-5*01
CAIKWIDEQFF	TRBV12-4*01	TRBJ2-1*01
CASSSGTRFGSEQYF	TRBV5-1*01	TRBJ2-7*01
CSVADRGEQYF	TRBV29-1*01	TRBJ2-7*01
CSVLGPGTIAKNIQYF	TRBV29-1*01	TRBJ2-4*01
CASSGPKVQSDTQYF	TRBV12-4*01	TRBJ2-3*01
CASSLAPGLNTEAFF	TRBV7-2*01	TRBJ1-1*01
CASRARGNQPQHF	TRBV6-5*01	TRBJ1-5*01
CASSPGTSRQFNF	TRBV5-1*01	TRBJ2-3*01
CASSPGQRYNEQFF	TRBV18*01	TRBJ2-1*01
CASMEDYNTEAFF	TRBV21-1*01	TRBJ1-1*01
CASSATQRGYTF	TRBV5-4*01	TRBJ1-2*01
CASSLTVGGIVGNTIYF	TRBV7-9*01	TRBJ1-3*01
CSAPWRQETQYF	TRBV20-1*01	TRBJ2-5*01
CSARSGQGAEKLFF	TRBV20-1*01	TRBJ1-4*01
CASSLGPGHGVAFF	TRBV11-2*01	TRBJ1-1*01
CASSPGPNTEAFF	TRBV7-3*01	TRBJ1-1*01
CASSQYSYNEQFF	TRBV11-2*01	TRBJ2-1*01
CASSGGRVSGANVLTF	TRBV9*01	TRBJ2-6*01
CASSLTANQPQHF	TRBV27*01	TRBJ1-5*01
CASSLARWTGGELFF	TRBV7-2*01	TRBJ2-2*01
CASSPSTGTDNEKLFF	TRBV18*01	TRBJ1-4*01
CASSLGEPTGDQPQHF	TRBV7-2*01	TRBJ1-5*01
CATTSRVYNEQFF	TRBV24-1*01	TRBJ2-1*01
CASSPRQQNSYEQYF	TRBV3-1*01	TRBJ2-7*01
CASGDAGTENQPQHF	TRBV5-1*01	TRBJ1-5*01
CASSPAPGQGSAEAFF	TRBV6-1*01	TRBJ1-1*01
CSVHPGQGAGTEAFF	TRBV29-1*01	TRBJ1-1*01
CASSNGGASGELFF	TRBV9*01	TRBJ2-2*01
CASSPGTSGTSYNEQFF	TRBV5-4*01	TRBJ2-1*01
CASSALRGQMYNEQFF	TRBV19*01	TRBJ2-1*01
CASSQELAGTNTGELFF	TRBV4-3*01	TRBJ2-2*01
CASSLLQGVTEAFF	TRBV28*01	TRBJ1-1*01
CASSLDPFGGVTGTEQFF	TRBV7-6*01	TRBJ2-1*01
CASSSQPDSYNSPLHF	TRBV7-2*01	TRBJ1-6*01
CAWSSTGALTDTQYF	TRBV30*01	TRBJ2-3*01
CASSPRTSGRLWNEQFF	TRBV28*01	TRBJ2-1*01
CASSSTSGGAGEQYF	TRBV7-2*01	TRBJ2-7*01
CAIRTGGGAAYEQYF	TRBV10-3*01	TRBJ2-7*01
CASSYSIFGSTDTQYF	TRBV6-5*01	TRBJ2-3*01
CSAEVRAGVNYEQYF	TRBV20-1*01	TRBJ2-7*01
CASSLYSPGRSGEKLFF	TRBV28*01	TRBJ1-4*01
CASSPRDRGREANEKLFF	TRBV5-5*01	TRBJ1-4*01
CASSIGGISEAFF	TRBV19*01	TRBJ1-1*01
CASSLWTDRDYGYTF	TRBV7-9*01	TRBJ1-2*01
CASTHDWTYNSPLHF	TRBV12-4*01	TRBJ1-6*01
CASSSNRGVNEQFF	TRBV7-2*01	TRBJ2-1*01
CASSDLKGADTQYF	TRBV9*01	TRBJ2-3*01
CASSLITIGYEQYF	TRBV7-9*01	TRBJ2-7*01
CASSPRDAHEQYF	TRBV18*01	TRBJ2-7*01
CASSLRQESYEQYF	TRBV4-1*01	TRBJ2-7*01
CASSLNPLNTEAFF	TRBV7-3*01	TRBJ1-1*01
CASSLLAGPRRADTQYF	TRBV28*01	TRBJ2-3*01
CASSYSRQGQPQHF	TRBV6-5*01	TRBJ1-5*01
CASSLDGGGFYGYTF	TRBV5-6*01	TRBJ1-2*01
CGSSPPGANIQYF	TRBV7-3*01	TRBJ2-4*01
CASRNRGGATDTQYF	TRBV5-1*01	TRBJ2-3*01
CASSQTSGVYNEQFF	TRBV7-2*01	TRBJ2-1*01
CSVEVSIEAFF	TRBV29-1*01	TRBJ1-1*01
CSVDVRGMNTEAFF	TRBV29-1*01	TRBJ1-1*01
CATSSHRGGTGELFF	TRBV15*01	TRBJ2-2*01
CASSSQGAYEQYF	TRBV6-5*01	TRBJ2-7*01
CASSFSREETQYF	TRBV12-4*01	TRBJ2-5*01
CASSTFGGSFYNEQFF	TRBV6-1*01	TRBJ2-1*01
CASSQLQGAAQPQHF	TRBV12-4*01	TRBJ1-5*01
CTYRRGHQETQYF	TRBV29-1*01	TRBJ2-5*01
CASSPRGRGDWGTQYF	TRBV7-6*01	TRBJ2-5*01
CASPGGQPQHF	TRBV7-2*01	TRBJ1-5*01
CASTDLGRETQYF	TRBV6-5*01	TRBJ2-5*01
CSVEGGPGNTIYF	TRBV29-1*01	TRBJ1-3*01
CSARDGGTEAFF	TRBV20-1*01	TRBJ1-1*01
CSARSGISGANVLTF	TRBV20-1*01	TRBJ2-6*01
CASSLVTDTQYF	TRBV28*01	TRBJ2-3*01
CASSEQGQPQHF	TRBV7-2*01	TRBJ1-5*01
CASSFQRGNEQFF	TRBV13*01	TRBJ2-1*01
CASSPQSRWQGVTYEQYF	TRBV7-9*01	TRBJ2-7*01
CSAGTASNYGYTF	TRBV20-1*01	TRBJ1-2*01
CASSTGQGASTDTQYF	TRBV7-2*01	TRBJ2-3*01
CASSWSKETQYF	TRBV12-4*01	TRBJ2-5*01
CASSRGGGGSTDTQYF	TRBV7-9*01	TRBJ2-3*01
CASSWGATRETQYF	TRBV7-2*01	TRBJ2-5*01
CASSLERGGPDTQYF	TRBV7-2*01	TRBJ2-3*01
CSAQQPDLTKRNTIYF	TRBV20-1*01	TRBJ1-3*01
CASSFARGDNEQFF	TRBV12-4*01	TRBJ2-1*01
CASSLVTYEQYF	TRBV7-6*01	TRBJ2-7*01
CASSVDPDYEQYF	TRBV9*01	TRBJ2-7*01
CASSDSNEQHNEQFF	TRBV6-4*01	TRBJ2-1*01
CASSLAPSGVRQPQHF	TRBV5-6*01	TRBJ1-5*01
CASSWGPGGGTEAFF	TRBV6-5*01	TRBJ1-1*01
CSAEASGRSTDTQYF	TRBV20-1*01	TRBJ2-3*01
CASSRRGATNEKLFF	TRBV7-2*01	TRBJ1-4*01
CASSLVSGSSYNEQFF	TRBV7-2*01	TRBJ2-1*01
CASSYYEDSVLYF	TRBV6-6*01	TRBJ2-5*01
CASHRVVNTEAFF	TRBV27*01	TRBJ1-1*01
CASRSGQGLSEETQYF	TRBV11-1*01	TRBJ2-5*01
CASSRQYTEAFF	TRBV28*01	TRBJ1-1*01
CSARASQYEQYF	TRBV20-1*01	TRBJ2-7*01
CASRGGGLTNEKLFF	TRBV28*01	TRBJ1-4*01
CASSQDTEGSYNEQFF	TRBV3-1*01	TRBJ2-1*01
CASSSEGGARENEQFF	TRBV12-4*01	TRBJ2-1*01
CASSSFSGYTF	TRBV5-8*01	TRBJ1-2*01
CASRTEENTEAFF	TRBV12-4*01	TRBJ1-1*01
CASSAGTPATNEKLFF	TRBV5-1*01	TRBJ1-4*01
CASSLGVVETQYF	TRBV28*01	TRBJ2-5*01
CASSQTASNYGYTF	TRBV4-3*01	TRBJ1-2*01
CASSLTSEGGYSNQPQHF	TRBV18*01	TRBJ1-5*01
CAWSGEVQGAPNTEAFF	TRBV30*01	TRBJ1-1*01
CAISESYTEAFF	TRBV10-3*01	TRBJ1-1*01
CASSRRTRGDNEQFF	TRBV7-8*01	TRBJ2-1*01
CASSFGTGDDEQFF	TRBV12-4*01	TRBJ2-1*01
CASSPSTVSYEQYF	TRBV4-3*01	TRBJ2-7*01
CASSLQGPDTQYF	TRBV28*01	TRBJ2-3*01
CAWRPRGPQETQYF	TRBV30*01	TRBJ2-5*01
CASSPPRTGLANYGYTF	TRBV18*01	TRBJ1-2*01
CSARNPGASGSTDTQYF	TRBV20-1*01	TRBJ2-3*01
CASSLQGSGETQYF	TRBV7-9*01	TRBJ2-5*01
CASSQERAHEQFF	TRBV4-2*01	TRBJ2-1*01
CASSQILEKLFF	TRBV2*01	TRBJ1-4*01
CSAPRGNEQYF	TRBV20-1*01	TRBJ2-7*01
CASSTTAGGPLNTQYF	TRBV5-1*01	TRBJ2-3*01
CASSFVGGGWGRKFEEAFF	TRBV7-8*01	TRBJ1-1*01
CASSQTGDQTQYF	TRBV7-3*01	TRBJ2-5*01
CASSLAEPYEQYF	TRBV5-1*01	TRBJ2-7*01
CASRQAGTRYNEQFF	TRBV3-1*01	TRBJ2-1*01
CASSEQWNSNQPQHF	TRBV6-1*01	TRBJ1-5*01
CSALAGRWGEKLFF	TRBV20-1*01	TRBJ1-4*01
CASSQDYSRGAGETQYF	TRBV3-1*01	TRBJ2-5*01
CASSYEGYSGNTIYF	TRBV6-5*01	TRBJ1-3*01
CASSPTGDYTEAFF	TRBV18*01	TRBJ1-1*01
CSALPRDGEQYF	TRBV20-1*01	TRBJ2-7*01
CASSSPGGQRFQETQYF	TRBV6-5*01	TRBJ2-5*01
CSASWSGGEETQYF	TRBV20-1*01	TRBJ2-5*01
CASSLAGTPNTEAFF	TRBV7-2*01	TRBJ1-1*01
CASSPEHSNQPQHF	TRBV28*01	TRBJ1-5*01
CASRGTGLYNEQFF	TRBV6-5*01	TRBJ2-1*01
CASSLSLDDIQYF	TRBV27*01	TRBJ2-4*01
CASSEAKWEPTLNTEAFF	TRBV10-1*01	TRBJ1-1*01
CAGVALAGGADTQYF	TRBV30*01	TRBJ2-3*01
CSARGGEEQYF	TRBV20-1*01	TRBJ2-7*01
CASSEGRFSNQPQHF	TRBV25-1*01	TRBJ1-5*01
CASSLWGSGGGETQYF	TRBV7-2*01	TRBJ2-5*01
CASSSTGTGHYEQYF	TRBV6-1*01	TRBJ2-7*01
CASSQNTVYNSPLHF	TRBV14*01	TRBJ1-6*01
CASSYSTGEKLFF	TRBV6-5*01	TRBJ1-4*01
CASSLFENTEAFF	TRBV11-3*01	TRBJ1-1*01
CSVPKGNEQFF	TRBV29-1*01	TRBJ2-1*01
CASSFARTGTTYEQYF	TRBV28*01	TRBJ2-7*01
CASRGADEQYF	TRBV12-4*01	TRBJ2-7*01
CASSLGQWGVNTEAFF	TRBV2*01	TRBJ1-1*01
CASRTSGLRSYEQYF	TRBV21-1*01	TRBJ2-7*01
CASSRRTSGILFAYEQYF	TRBV6-5*01	TRBJ2-7*01
CASSEGSSGETQYF	TRBV10-1*01	TRBJ2-5*01
CASSLVRVGEAFF	TRBV7-2*01	TRBJ1-1*01
CSAILAGADTQYF	TRBV20-1*01	TRBJ2-3*01
CASSRTASNGEAFF	TRBV5-4*01	TRBJ1-1*01
CASSQGGQGNGYTF	TRBV7-9*01	TRBJ1-2*01
CASRGGTSEQQFF	TRBV19*01	TRBJ2-1*01
CAISEQLAGELFF	TRBV10-3*01	TRBJ2-2*01
CATSARGTIRRDTQYF	TRBV24-1*01	TRBJ2-3*01
CASSPHSDWEAQYF	TRBV3-1*01	TRBJ2-5*01
CASSLGGGSSYEQYF	TRBV11-2*01	TRBJ2-7*01
CASSPPGTSDYNEQFF	TRBV18*01	TRBJ2-1*01
CASSVGVVETQYF	TRBV7-2*01	TRBJ2-5*01
CASSWRTRTSTDTQYF	TRBV6-6*01	TRBJ2-3*01
CASSPGTSGVDTQYF	TRBV6-5*01	TRBJ2-3*01
CASSYSSGARTEAFF	TRBV6-5*01	TRBJ1-1*01
CSALGLAGISSYEQYF	TRBV29-1*01	TRBJ2-7*01
CASSGGSTDTQYF	TRBV6-1*01	TRBJ2-3*01
CSARDADGLSSYEQYF	TRBV20-1*01	TRBJ2-7*01
CASSQEGADRGLGTEAFF	TRBV4-1*01	TRBJ1-1*01
CASTANELSGANVLTF	TRBV4-3*01	TRBJ2-6*01
CASSLPSGGTQGEQFF	TRBV28*01	TRBJ2-1*01
CACTRVGSGNTIYF	TRBV30*01	TRBJ1-3*01
CAWSVLAGADTQYF	TRBV30*01	TRBJ2-3*01
CASSDAGLASYEQYF	TRBV6-1*01	TRBJ2-7*01
CASSPDLTGGSGGYTF	TRBV18*01	TRBJ1-2*01
CASRQGTFEQYF	TRBV6-5*01	TRBJ2-7*01
CSAPPAGEGTDTQYF	TRBV20-1*01	TRBJ2-3*01
CASSPGIDRGFTGELFF	TRBV18*01	TRBJ2-2*01
CASSLETVNEQYF	TRBV5-5*01	TRBJ2-7*01
CASSRDSWDTQYF	TRBV12-4*01	TRBJ2-3*01
CASSQDHGATEAFF	TRBV4-3*01	TRBJ1-1*01
CASSTIGTGGWEPQHF	TRBV27*01	TRBJ1-5*01
CASSQDGTGLAKNIQYF	TRBV3-1*01	TRBJ2-4*01
CATSRRGNTVELFF	TRBV15*01	TRBJ2-2*01
CASRETGTPNEKLFF	TRBV27*01	TRBJ1-4*01
CASSQNQPPNEQFF	TRBV16*01	TRBJ2-1*01
CASSLAADREQYF	TRBV7-2*01	TRBJ2-7*01
CASSFTGTASGNTIYF	TRBV5-1*01	TRBJ1-3*01
CSVEDRGLENIQYF	TRBV29-1*01	TRBJ2-4*01
CASSGGVRYYGYTF	TRBV25-1*01	TRBJ1-2*01
CASSLRAGTTDTQYF	TRBV5-6*01	TRBJ2-3*01
CASSQAGASNYGYTF	TRBV18*01	TRBJ1-2*01
CASSPSGAAYEQYF	TRBV4-1*01	TRBJ2-7*01
CASSYGGRLDTIYF	TRBV6-6*01	TRBJ1-3*01
CASSLYFDQDEQFF	TRBV27*01	TRBJ2-1*01
CASSFGTGNQPQHF	TRBV27*01	TRBJ1-5*01
CAIKGPGSLYGYTF	TRBV10-3*01	TRBJ1-2*01
CASSPPSNEKLFF	TRBV7-8*01	TRBJ1-4*01
CARRELPSGINNEQFF	TRBV23-1*01	TRBJ2-1*01
CASGSTSGVVAGANVLTF	TRBV12-5*01	TRBJ2-6*01
CASSKDRAGANVLTF	TRBV5-1*01	TRBJ2-6*01
CASSISKLNEQFF	TRBV5-1*01	TRBJ2-1*01
CSAEGSGEGNSPLHF	TRBV20-1*01	TRBJ1-6*01
CSASPTPANTGELFF	TRBV20-1*01	TRBJ2-2*01
CASSGQANQPQHF	TRBV2*01	TRBJ1-5*01
CASSGIQGAPPNTEAFF	TRBV7-9*01	TRBJ1-1*01
CASSLSQGGHGYTF	TRBV7-2*01	TRBJ1-2*01
CSVVQLSRYNEQFF	TRBV29-1*01	TRBJ2-1*01
CAISGTGAGTSRVNEQFF	TRBV10-3*01	TRBJ2-1*01
CASSVVDTQYF	TRBV9*01	TRBJ2-3*01
CASSGFTGTPSTTNEKLFF	TRBV12-4*01	TRBJ1-4*01
CASSPRQGWNGANVLTF	TRBV14*01	TRBJ2-6*01
CASRPQGRSSYNEQFF	TRBV6-5*01	TRBJ2-1*01
CASSSRVYGYTF	TRBV28*01	TRBJ1-2*01
CASSIRRGATDTQYF	TRBV19*01	TRBJ2-3*01
CASRRPEANVLTF	TRBV6-1*01	TRBJ2-6*01
CASSGSGTIYNEQFF	TRBV7-3*01	TRBJ2-1*01
CASSQVGTSGRDTQYF	TRBV4-3*01	TRBJ2-3*01
CASSIPGLSTGELFF	TRBV19*01	TRBJ2-2*01
CASSYSFSTDTQYF	TRBV6-5*01	TRBJ2-3*01
CASSTDNSYNEQFF	TRBV19*01	TRBJ2-1*01
CASSANRENYGYTF	TRBV9*01	TRBJ1-2*01
CASSVGLQGLEDEQFF	TRBV9*01	TRBJ2-1*01
CASSLAGEYEQYF	TRBV7-9*01	TRBJ2-7*01
CAISEFRVADTDTQYF	TRBV10-3*01	TRBJ2-3*01
CATSVGTSQETQYF	TRBV28*01	TRBJ2-5*01
CASSWDKATDTQYF	TRBV27*01	TRBJ2-3*01
CASSLAGGLAFF	TRBV11-2*01	TRBJ1-1*01
CAITMEGNVNEQYF	TRBV10-3*01	TRBJ2-7*01
CSVVLANRDEQFF	TRBV29-1*01	TRBJ2-1*01
CASSLYTEAFF	TRBV7-9*01	TRBJ1-1*01
CASSQYRTTNEKLFF	TRBV4-1*01	TRBJ1-4*01
CATREGLAASTDTQYF	TRBV15*01	TRBJ2-3*01
CASSLVGQGADEGQPQHF	TRBV7-2*01	TRBJ1-5*01
CASSFLSGTDTQYF	TRBV27*01	TRBJ2-3*01
CASSQPGPEAYEQYF	TRBV5-1*01	TRBJ2-7*01
CASFQPGQPNEKLFF	TRBV7-9*01	TRBJ1-4*01
CASSEAGGPTYEQYF	TRBV6-1*01	TRBJ2-7*01
CASSLSLWVKTDTQYF	TRBV12-4*01	TRBJ2-3*01
CSVVVGSSSYNEQFF	TRBV29-1*01	TRBJ2-1*01
CASSYWRAYYNEQFF	TRBV6-1*01	TRBJ2-1*01
CASTLGAGEQYF	TRBV12-4*01	TRBJ2-7*01
CANSSSDSVEAFF	TRBV27*01	TRBJ1-1*01
CASSLSHTDTQYF	TRBV7-6*01	TRBJ2-3*01
CSARDLLDRFYSNQPQHF	TRBV20-1*01	TRBJ1-5*01
CASSRLGGSAYEQYF	TRBV7-8*01	TRBJ2-7*01
CASSGGLAGAPSTDTQYF	TRBV19*01	TRBJ2-3*01
CASSFGTNYGYTF	TRBV12-4*01	TRBJ1-2*01
CASTPRTGYFVSGANVLTF	TRBV5-5*01	TRBJ2-6*01
CASRPLGTGRHNEQFF	TRBV6-5*01	TRBJ2-1*01
CASSPPMAPGQPQHF	TRBV18*01	TRBJ1-5*01
CASSPQGVYNEQFF	TRBV5-4*01	TRBJ2-1*01
CASNLAGPTGNTIYF	TRBV28*01	TRBJ1-3*01
CASSPPSGGARGTDTQYF	TRBV12-4*01	TRBJ2-3*01
CSARGTGGTDTQYF	TRBV20-1*01	TRBJ2-3*01
CSARDPTSEHYNEQFF	TRBV20-1*01	TRBJ2-1*01
CASSQDTETQYF	TRBV3-1*01	TRBJ2-5*01
CASGRSSAKNIQYF	TRBV28*01	TRBJ2-4*01
CASSRGLAKDTQYF	TRBV6-5*01	TRBJ2-3*01
CASSPAALLAKLFF	TRBV18*01	TRBJ1-4*01
CASSPTSVPSPLHF	TRBV12-4*01	TRBJ1-6*01
CASSRTGELFF	TRBV12-4*01	TRBJ2-2*01
CASSKRGPQEVPPYNEQFF	TRBV11-3*01	TRBJ2-1*01
CASSSPGQNTEAFF	TRBV3-1*01	TRBJ1-1*01
CASRNLLQGARNIQYF	TRBV6-1*01	TRBJ2-4*01
CASSLGWRATGSNEQFF	TRBV7-6*01	TRBJ2-1*01
CSARTALREEKLFF	TRBV20-1*01	TRBJ1-4*01
CASSQLAGEAYEQYF	TRBV4-3*01	TRBJ2-7*01
CASSQETTWPGDYHTQYF	TRBV4-1*01	TRBJ2-3*01
CASTPNPANTGELFF	TRBV7-2*01	TRBJ2-2*01
CASSETSNSPLHF	TRBV2*01	TRBJ1-6*01
CASRVRGTGGFNEQFF	TRBV27*01	TRBJ2-1*01
CASRGGRTQPQHF	TRBV27*01	TRBJ1-5*01
CASSYWGNTIYF	TRBV6-1*01	TRBJ1-3*01
CASSQTGQGEGGYTF	TRBV6-1*01	TRBJ1-2*01
CASSGEHGSNQPQHF	TRBV19*01	TRBJ1-5*01
CAISEVDSGANVLTF	TRBV10-3*01	TRBJ2-6*01
CASSQREGRYEQYF	TRBV27*01	TRBJ2-7*01
CASSFSELSYEQYF	TRBV27*01	TRBJ2-7*01
CASSSLDLAGLNIQYF	TRBV28*01	TRBJ2-4*01
CASGEQGGTEAFF	TRBV12-4*01	TRBJ1-1*01
CASRGNLALHTDTQYF	TRBV6-6*01	TRBJ2-3*01
CASSATELYEQYF	TRBV19*01	TRBJ2-7*01
CASSLTGTEQYF	TRBV18*01	TRBJ2-7*01
CASSLRGIPEQPQHF	TRBV12-4*01	TRBJ1-5*01
CASSEETSGGPNNEQFF	TRBV2*01	TRBJ2-1*01
CASSPQGLKTYEQYF	TRBV12-4*01	TRBJ2-7*01
CASSRGSGNEQFF	TRBV5-1*01	TRBJ2-1*01
CASSYGTSKNIQYF	TRBV6-5*01	TRBJ2-4*01
CASSLRTGTEKLAKNIQYF	TRBV5-1*01	TRBJ2-4*01
CASSFITGSNTGELFF	TRBV7-9*01	TRBJ2-2*01
CASSQVRGLTYEQYF	TRBV4-2*01	TRBJ2-7*01
CASSQDPGSSYNEQFF	TRBV4-1*01	TRBJ2-1*01
CASSSGIAGNTIYF	TRBV28*01	TRBJ1-3*01
CASASNTGSSYEQYF	TRBV28*01	TRBJ2-7*01
CASSPWTVTGELFF	TRBV11-2*01	TRBJ2-2*01
CASKVGGTDTQYF	TRBV6-1*01	TRBJ2-3*01
CASTSLLGGGNYNEQFF	TRBV21-1*01	TRBJ2-1*01
CASSDRLADLGVDEQLF	TRBV7-2*01	TRBJ2-1*01
CSAGRLNTEAFF	TRBV20-1*01	TRBJ1-1*01
CASSQAAGYNQPQHF	TRBV4-1*01	TRBJ1-5*01
CASSLLTGYGYTF	TRBV27*01	TRBJ1-2*01
CASSSRGEYEQYF	TRBV7-9*01	TRBJ2-7*01
CSVGGGGEQFF	TRBV29-1*01	TRBJ2-1*01
CASSLQRADQILHF	TRBV5-1*01	TRBJ1-6*01
CASRTGGYTDTQYF	TRBV2*01	TRBJ2-3*01
CASSPRLAGALTGELFF	TRBV7-2*01	TRBJ2-2*01
CASSARETQYF	TRBV2*01	TRBJ2-5*01
CASSSAGQGTHEQYF	TRBV28*01	TRBJ2-7*01
CSVAFGGNTEAFF	TRBV29-1*01	TRBJ1-1*01
CASSQVTSGSHEQYF	TRBV4-1*01	TRBJ2-7*01
CASSEKNEKLFF	TRBV28*01	TRBJ1-4*01
CASSQERTGYNEQFF	TRBV4-1*01	TRBJ2-1*01
CASSVVGGTDTQYF	TRBV9*01	TRBJ2-3*01
CASSLIAYGLAGEETQYF	TRBV7-8*01	TRBJ2-5*01
CASRGSETQYF	TRBV5-1*01	TRBJ2-5*01
CASSRTGRDEQYF	TRBV18*01	TRBJ2-7*01
CSVGGGENSPLHF	TRBV29-1*01	TRBJ1-6*01
CASSVGGWEGRGEQFF	TRBV9*01	TRBJ2-1*01
CASTKTSGSYEQYF	TRBV27*01	TRBJ2-7*01
CASSPGDNQPQHF	TRBV11-3*01	TRBJ1-5*01
CASSYPTIGTSDYGYTF	TRBV6-6*01	TRBJ1-2*01
CASSAGLPFSYDSPLHF	TRBV7-9*01	TRBJ1-6*01
CASSFGGGNTEAFF	TRBV7-3*01	TRBJ1-1*01
CSVLHGGRTEAFF	TRBV29-1*01	TRBJ1-1*01
CSARDKGYGYTF	TRBV20-1*01	TRBJ1-2*01
CASSLVNNEQFF	TRBV5-1*01	TRBJ2-1*01
CASSLAGSGTYEQYF	TRBV7-2*01	TRBJ2-7*01
CSVYLNTWEAFF	TRBV29-1*01	TRBJ1-1*01
CSVAGTSGGASTDTQYF	TRBV29-1*01	TRBJ2-3*01
CAISVRASLETQYF	TRBV10-3*01	TRBJ2-5*01
CASSPTGADTEAFF	TRBV18*01	TRBJ1-1*01
CAWSSGPYNQPQHF	TRBV30*01	TRBJ1-5*01
CASSERGPYEQYF	TRBV6-1*01	TRBJ2-7*01
CASSPLRGDGTDTQYF	TRBV7-8*01	TRBJ2-3*01
CSARHPGGVSDTQYF	TRBV20-1*01	TRBJ2-3*01
CSVELSRGYGYTF	TRBV29-1*01	TRBJ1-2*01
CASVLSVSHEQYF	TRBV28*01	TRBJ2-7*01
CASSFSDRAQETQYF	TRBV7-9*01	TRBJ2-5*01
CAISRDPLNTEAFF	TRBV6-5*01	TRBJ1-1*01
CASTPGPQSAIYF	TRBV12-4*01	TRBJ1-3*01
CASSPVLDSYGYTF	TRBV5-6*01	TRBJ1-2*01
CASSLTGTSDNEQFF	TRBV5-1*01	TRBJ2-1*01
CASSLGLLGGGLDEQFF	TRBV7-6*01	TRBJ2-1*01
CASSLGQGAGETQYF	TRBV12-4*01	TRBJ2-5*01
CASTDLVELGLHF	TRBV12-4*01	TRBJ1-6*01
CASSLLEGNYGYTF	TRBV7-9*01	TRBJ1-2*01
CATSSHMGGDNEQFF	TRBV7-2*01	TRBJ2-1*01
CASRPPQGAKNIQYF	TRBV6-5*01	TRBJ2-4*01
CASSFQGASTDTQYF	TRBV11-2*01	TRBJ2-3*01
CASSEEAGGAYNEQFF	TRBV6-1*01	TRBJ2-1*01
CSARDHGGRNTEAFF	TRBV20-1*01	TRBJ1-1*01
CASSPFPTGTSYNEQFF	TRBV4-2*01	TRBJ2-1*01
CSAREGTSGPYEQYF	TRBV20-1*01	TRBJ2-7*01
CASSQENTQYF	TRBV4-1*01	TRBJ2-5*01
CASMEGYGNQPQHF	TRBV28*01	TRBJ1-5*01
CASSLRRDQPQHF	TRBV7-8*01	TRBJ1-5*01
CSVPPSGTDNSPLHF	TRBV29-1*01	TRBJ1-6*01
CASSYVGTTNYGYTF	TRBV6-5*01	TRBJ1-2*01
CSARGTSGRETYNEQFF	TRBV20-1*01	TRBJ2-1*01
CASSQDLMQPQHF	TRBV4-1*01	TRBJ1-5*01
CAISTGTGYGYTF	TRBV10-3*01	TRBJ1-2*01
CASTTLGYTDTQYF	TRBV12-4*01	TRBJ2-3*01
CASSLGGTGYNEQFF	TRBV5-1*01	TRBJ2-1*01
CSARIDPNTGELFF	TRBV20-1*01	TRBJ2-2*01
CASSREGLGETQYF	TRBV2*01	TRBJ2-5*01
CASSTQNFSGYTF	TRBV28*01	TRBJ1-2*01
CASSFLTSGDEQFF	TRBV6-1*01	TRBJ2-1*01
CASSSYREEAFF	TRBV27*01	TRBJ1-1*01
CASSSGRGWGTEAFF	TRBV11-2*01	TRBJ1-1*01
CASIGGSTEAFF	TRBV12-4*01	TRBJ1-1*01
CASSLFGTSDTYEQYF	TRBV7-2*01	TRBJ2-7*01
CASSYRGNTGELFF	TRBV13*01	TRBJ2-2*01
CASSLYREGNSPLHF	TRBV11-2*01	TRBJ1-6*01
CASSFGGRDGYTF	TRBV12-4*01	TRBJ1-2*01
CASSQENRWYEQYF	TRBV4-3*01	TRBJ2-7*01
CASSTGSDTQYF	TRBV5-6*01	TRBJ2-3*01
CASSEGGQTQPQHF	TRBV2*01	TRBJ1-5*01
CATSGASGGGTDTQYF	TRBV15*01	TRBJ2-3*01
CSVAIPNRNEQFF	TRBV29-1*01	TRBJ2-1*01
CSARGVGAGETQYF	TRBV20-1*01	TRBJ2-5*01
CASSYGQPYHF	TRBV6-5*01	TRBJ2-3*01
CASSFGRNEQYF	TRBV7-8*01	TRBJ2-7*01
CASSQTGTNTEAFF	TRBV4-1*01	TRBJ1-1*01
CASSGLALAGGANTQYF	TRBV9*01	TRBJ2-3*01
CASSTSGTGSYNSPLHF	TRBV6-9*01	TRBJ1-6*01
CASSPRTGRREAQYF	TRBV3-1*01	TRBJ2-5*01
CASSQEGANIQNF	TRBV3-1*01	TRBJ2-4*01
CSAISGGSSYEQYF	TRBV20-1*01	TRBJ2-7*01
CASVRGRADLSGANVLTF	TRBV7-2*01	TRBJ2-6*01
CSARSLSSGGVLPTDTQYF	TRBV20-1*01	TRBJ2-3*01
CASSRSGIDTQYF	TRBV10-2*01	TRBJ2-3*01
CASSYSRSALGRSNYGYTF	TRBV6-5*01	TRBJ1-2*01
CASSRDSGGVGYNEQFF	TRBV6-9*01	TRBJ2-1*01
CASLLLGRWDTDAQYF	TRBV5-1*01	TRBJ2-3*01
CASSSRTHQFRVNTEAFF	TRBV7-9*01	TRBJ1-1*01
CASSQDRRGGNTGELFF	TRBV4-3*01	TRBJ2-2*01
CASSRDSKASGANVLTF	TRBV4-1*01	TRBJ2-6*01
CASSSSGSRNEQFF	TRBV7-8*01	TRBJ2-1*01
CASSHRRRGNTDTQYF	TRBV14*01	TRBJ2-3*01
CSAPSFGGGTDTQYF	TRBV20-1*01	TRBJ2-3*01
CASSLLIGTGNRPQHF	TRBV27*01	TRBJ1-5*01
CSARDWDRVYTEAFF	TRBV20-1*01	TRBJ1-1*01
CAISYSGGGVYNEQFF	TRBV10-3*01	TRBJ2-1*01
CAWSVLMTGELFF	TRBV30*01	TRBJ2-2*01
CASSLLGGQPDTGELFF	TRBV7-3*01	TRBJ2-2*01
CASSLAGGGATDTQYF	TRBV7-6*01	TRBJ2-3*01
CASSAYGATNEKLFF	TRBV7-9*01	TRBJ1-4*01
CASTQKCRGPADTQYF	TRBV6-9*01	TRBJ2-3*01
CASSFRTGATDTQYF	TRBV5-6*01	TRBJ2-3*01
CASALSRNQPQHF	TRBV4-1*01	TRBJ1-5*01
CASSLARDSFYSGANVLTF	TRBV5-1*01	TRBJ2-6*01
CSARPIRDRSSYEQYF	TRBV20-1*01	TRBJ2-7*01
CASDLTGGLNGYTF	TRBV12-5*01	TRBJ1-2*01
CSVGGTGGTDTQYF	TRBV29-1*01	TRBJ2-3*01
CASSQSRGMNTEAFF	TRBV4-2*01	TRBJ1-1*01
CATDRGNTIYF	TRBV12-4*01	TRBJ1-3*01
CSVGQGNGYTF	TRBV29-1*01	TRBJ1-2*01
CSVAGTSRGETQYF	TRBV29-1*01	TRBJ2-5*01
CASRQPTGTRPNEQFF	TRBV7-2*01	TRBJ2-1*01
CASSQGTRLSETQYF	TRBV7-9*01	TRBJ2-5*01
CASMGRGYEQYF	TRBV2*01	TRBJ2-7*01
CASSKGTGNSNQPQHF	TRBV27*01	TRBJ1-5*01
CSVVAGTYEQYF	TRBV29-1*01	TRBJ2-7*01
CASSLKGGGNTEAFF	TRBV3-1*01	TRBJ1-1*01
CASRLSGGNQPQHF	TRBV6-1*01	TRBJ1-5*01
CASSPRNQPQHF	TRBV12-4*01	TRBJ1-5*01
CASSQGMGYNEQFF	TRBV4-3*01	TRBJ2-1*01
CASSGLAYNEQFF	TRBV19*01	TRBJ2-1*01
CASRPNRRGGDNQPQHF	TRBV6-1*01	TRBJ1-5*01
CASSPPGLNEQFF	TRBV18*01	TRBJ2-1*01
CASSLDGNNEQFF	TRBV7-2*01	TRBJ2-1*01
CSALRGMGPSTEAFF	TRBV29-1*01	TRBJ1-1*01
CASSQPAWRGSSYEQYF	TRBV3-1*01	TRBJ2-7*01
CSVEVGQGAGELFF	TRBV29-1*01	TRBJ2-2*01
CSLRWGTEAFF	TRBV29-1*01	TRBJ1-1*01
CASSLAGGTDTQYF	TRBV4-1*01	TRBJ2-3*01
CASSSDRGNQPQHF	TRBV12-4*01	TRBJ1-5*01
CASSSTGGRNEKLFF	TRBV5-1*01	TRBJ1-4*01
CSTTHPGSRAYEQYF	TRBV20-1*01	TRBJ2-7*01
CASSPQGSLYNSPLHF	TRBV28*01	TRBJ1-6*01
CASSPRQGGEQYF	TRBV11-3*01	TRBJ2-7*01
CASSLNTDTQYF	TRBV7-2*01	TRBJ2-3*01
CASGQGNYEQYF	TRBV6-1*01	TRBJ2-7*01
CASSSGRVQGAAGELFF	TRBV11-2*01	TRBJ2-2*01
CASSLGGADWQPQHF	TRBV5-1*01	TRBJ1-5*01
CAISDRQGYEQFF	TRBV10-3*01	TRBJ2-1*01
CASSQGAGGLQETQYF	TRBV4-2*01	TRBJ2-5*01
CASSPRTGANTGELFF	TRBV7-2*01	TRBJ2-2*01
CASSSLARGGLDTQYF	TRBV27*01	TRBJ2-3*01
CASSRILSEGYGYTF	TRBV18*01	TRBJ1-2*01
CASSPPGQGSGNTIYF	TRBV28*01	TRBJ1-3*01
CASSEGWTANTEAFF	TRBV2*01	TRBJ1-1*01
CSARPTESNEKLFF	TRBV20-1*01	TRBJ1-4*01
CASSLEPRLAGGQRQFF	TRBV5-1*01	TRBJ2-1*01
CASSYSISGPQETQYF	TRBV6-5*01	TRBJ2-5*01
CASTQEADTQYF	TRBV11-2*01	TRBJ2-3*01
CASSPYDTDTQYF	TRBV5-8*01	TRBJ2-3*01
CASSPGTGGDTEAFF	TRBV11-2*01	TRBJ1-1*01
CASSYSRDSGSGETQYF	TRBV6-6*01	TRBJ2-5*01
CASSIGLYNEQFF	TRBV28*01	TRBJ2-1*01
CASSLREAGEAFF	TRBV12-4*01	TRBJ1-1*01
CATTGPSEETQYF	TRBV10-3*01	TRBJ2-5*01
CASSQDSILGYTF	TRBV3-1*01	TRBJ1-2*01
CASSPRTRYLHQPQHF	TRBV28*01	TRBJ1-5*01
CASSSSRGF	TRBV7-3*01	TRBJ2-4*01
CASSLGQGAYQPQHF	TRBV5-1*01	TRBJ1-5*01
CASSFWDRGLRSPYEQYF	TRBV5-1*01	TRBJ2-7*01
CASSMGQGDKNIQYF	TRBV5-1*01	TRBJ2-4*01
CASSTNGELFF	TRBV19*01	TRBJ2-2*01
CASRLQGLTEAFF	TRBV6-1*01	TRBJ1-1*01
CASSLAGQGHGYTF	TRBV7-8*01	TRBJ1-2*01
CASNKVGQGLNTEAFF	TRBV6-5*01	TRBJ1-1*01
CSARTSGGHNEQFF	TRBV20-1*01	TRBJ2-1*01
CSASRFQETQYF	TRBV20-1*01	TRBJ2-5*01
CASSHLSGGDGRADTQYF	TRBV3-1*01	TRBJ2-3*01
CASSPSDSAIQPQHF	TRBV18*01	TRBJ1-5*01
CASSLSRTDTIYF	TRBV7-9*01	TRBJ1-3*01
CASSPPRVPGELFF	TRBV11-2*01	TRBJ2-2*01
CAVMIPSYFGELFF	TRBV10-2*01	TRBJ2-2*01
CASSRSDGTYTEAFF	TRBV14*01	TRBJ1-1*01
CASSQVLPSLAYNEQFF	TRBV4-2*01	TRBJ2-1*01
CASSQRGQTNTDTQYF	TRBV4-3*01	TRBJ2-3*01
CAWTESGRNTEAFF	TRBV30*01	TRBJ1-1*01
CASSYRRLAGVDTQYF	TRBV6-5*01	TRBJ2-3*01
CASSYQDRVRGNQPQHF	TRBV6-6*01	TRBJ1-5*01
CSAERLQILFF	TRBV29-1*01	TRBJ2-1*01
CASSLGGQGVSYPQHF	TRBV5-6*01	TRBJ1-5*01
CASSYYPGQPMNTEAFF	TRBV6-9*01	TRBJ1-1*01
CASSLRTSVYNEQFF	TRBV28*01	TRBJ2-1*01
CASSLAGTGDTKNIQYF	TRBV7-9*01	TRBJ2-4*01
CSARPAAWDYGYTF	TRBV20-1*01	TRBJ1-2*01
CASSLLRGSYNEQFF	TRBV6-6*01	TRBJ2-1*01
CASSPRSGKRTQYF	TRBV14*01	TRBJ2-5*01
CASGRAGGGPDTQYF	TRBV12-5*01	TRBJ2-3*01
CASSLPSGLAGDNEQFF	TRBV7-8*01	TRBJ2-1*01
CASSQEGYNLHF	TRBV3-1*01	TRBJ1-6*01
CASSQDSGAVNEKLFF	TRBV4-1*01	TRBJ1-4*01
CASSQGFSSRGQYF	TRBV4-2*01	TRBJ2-7*01
CAIGSYEQYF	TRBV10-3*01	TRBJ2-7*01
CASSFLAGTGTGELFF	TRBV27*01	TRBJ2-2*01
CASRLGGSTNEKLFF	TRBV4-2*01	TRBJ1-4*01
CATSNNPGRNIANYGYTF	TRBV15*01	TRBJ1-2*01
CASSPGGLFYEQYF	TRBV9*01	TRBJ2-7*01
CASSARQNSPLHF	TRBV3-1*01	TRBJ1-6*01
CASKRDTNTEAFF	TRBV12-4*01	TRBJ1-1*01
CSASGQGSTDTQYF	TRBV20-1*01	TRBJ2-3*01
CASSLDRGAYGYTF	TRBV7-2*01	TRBJ1-2*01
CASSYSGQSNQPQHF	TRBV6-6*01	TRBJ1-5*01
CSARAPNRGRETQYF	TRBV20-1*01	TRBJ2-5*01
CASSITGAYGQPQHF	TRBV11-2*01	TRBJ1-5*01
CASSSDTPDTQYF	TRBV5-1*01	TRBJ2-3*01
CSVPSESFRGTEAFF	TRBV29-1*01	TRBJ1-1*01
CASSTPYREQFF	TRBV28*01	TRBJ2-1*01
CASTPTVGWGVAFF	TRBV27*01	TRBJ1-1*01
CASSPDPTSGRYEQYF	TRBV5-5*01	TRBJ2-7*01
CSVGGGYGYTF	TRBV29-1*01	TRBJ1-2*01
CASSYSNRDSRSSNQPQHF	TRBV6-1*01	TRBJ1-5*01
CASSLRGTGSDEQFF	TRBV3-1*01	TRBJ2-1*01
CASSVAKDSEGANYGYTF	TRBV9*01	TRBJ1-2*01
CSAWGGSYEQYF	TRBV29-1*01	TRBJ2-7*01
CASRGRAGTSGVDTQYF	TRBV5-1*01	TRBJ2-3*01
CSGREGGSEAFF	TRBV29-1*01	TRBJ1-1*01
CAISDTLAGSTDTQYF	TRBV10-3*01	TRBJ2-3*01
CASSLGDRGIHEQFF	TRBV12-4*01	TRBJ2-1*01
CSALFLYEQYF	TRBV29-1*01	TRBJ2-7*01
CSARKAGGNEQYF	TRBV20-1*01	TRBJ2-7*01
CASSLSGGFGNTIYF	TRBV27*01	TRBJ1-3*01
CASSLVTSQGSYEQYF	TRBV7-2*01	TRBJ2-7*01
CSARDLTLLSAGHTEAFF	TRBV20-1*01	TRBJ1-1*01
CASSPSSDTQYF	TRBV9*01	TRBJ2-3*01
CASSLDGGGTEAFF	TRBV7-2*01	TRBJ1-1*01
CSARKRPQETQYF	TRBV20-1*01	TRBJ2-5*01
CASSRPGLAANEQFF	TRBV28*01	TRBJ2-1*01
CASSLSRTGGNTIYF	TRBV7-2*01	TRBJ1-3*01
CASSPAGLATETQYF	TRBV11-2*01	TRBJ2-5*01
CASSLRTGATEAFF	TRBV12-4*01	TRBJ1-1*01
CASSAQGDGELFF	TRBV5-1*01	TRBJ2-2*01
CATPLDVRVQYF	TRBV5-1*01	TRBJ2-3*01
CSALNPASGSRNEQFF	TRBV29-1*01	TRBJ2-1*01
CSASRVNTGELFF	TRBV20-1*01	TRBJ2-2*01
CASSLLQGEYGYTF	TRBV5-1*01	TRBJ1-2*01
CSVDRGLETQYF	TRBV29-1*01	TRBJ2-5*01
CSVEERQPENTEAFF	TRBV29-1*01	TRBJ1-1*01
CASSYSKASGIREQYF	TRBV6-5*01	TRBJ2-7*01
CASSFLAGGLTDTQYF	TRBV27*01	TRBJ2-3*01
CASSSNSGYNNEQFF	TRBV5-1*01	TRBJ2-1*01
CASSWGTVDEQFF	TRBV28*01	TRBJ2-1*01
CSASLGTGGRNQPQHF	TRBV20-1*01	TRBJ1-5*01
CSAPTFLGTEAFF	TRBV20-1*01	TRBJ1-1*01
CASSTNYGYTF	TRBV9*01	TRBJ1-2*01
CASSLSPQGAHGEQYF	TRBV27*01	TRBJ2-7*01
CASSLELSSSPQHF	TRBV7-2*01	TRBJ1-5*01
CASSRPTGLSTGELFF	TRBV5-6*01	TRBJ2-2*01
CASSSWDSPWITEAFF	TRBV13*01	TRBJ1-1*01
CASSPLPVDFPVTGTEAFF	TRBV7-3*01	TRBJ1-1*01
CASSPAGGNYEQYF	TRBV11-2*01	TRBJ2-7*01
CASSLVRLNQPQHF	TRBV7-2*01	TRBJ1-5*01
CASSVGLAGGAQYF	TRBV9*01	TRBJ2-3*01
CASSLDRVSYTDTQYF	TRBV11-1*01	TRBJ2-3*01
CASSPWMGPKSSYNEQFF	TRBV6-9*01	TRBJ2-1*01
CASSSTGLASSEQYF	TRBV7-6*01	TRBJ2-7*01
CASSLRRGGANVLTF	TRBV28*01	TRBJ2-6*01
CASSPMEGVDYGYTF	TRBV18*01	TRBJ1-2*01
CSVRNDWNTGELFF	TRBV20-1*01	TRBJ2-2*01
CASSFSSGAITEAFF	TRBV7-3*01	TRBJ1-1*01
CASSTNQETQYF	TRBV11-2*01	TRBJ2-5*01
CASRPTYSRSIYNEQFF	TRBV12-4*01	TRBJ2-1*01
CASSHGGRGETEAFF	TRBV5-1*01	TRBJ1-1*01
CASSPGTGYGYTF	TRBV4-1*01	TRBJ1-2*01
CASSLRLAGVVNEQFF	TRBV5-1*01	TRBJ2-1*01
CASSTPPGQGPRNQPQHF	TRBV6-1*01	TRBJ1-5*01
CASSGQGRNTIYF	TRBV7-8*01	TRBJ1-3*01
CASRDLGSGKQETQYF	TRBV9*01	TRBJ2-5*01
CASSSWGGEDLLGTGELFF	TRBV9*01	TRBJ2-2*01
CASSLARELNSNQPQHF	TRBV7-2*01	TRBJ1-5*01
CASSSQRYNEQFF	TRBV5-1*01	TRBJ2-1*01
CASSPFTDTQYF	TRBV6-1*01	TRBJ2-3*01
CAISGTGGGSTDTQYF	TRBV10-3*01	TRBJ2-3*01
CASTLGQPGGYEQYF	TRBV2*01	TRBJ2-7*01
CASRDTGLQPQHF	TRBV28*01	TRBJ1-5*01
CASSSNQGAYEQYF	TRBV6-5*01	TRBJ2-7*01
CASSLVKYGTVSYNEQFF	TRBV7-2*01	TRBJ2-1*01
CASSQDLGQGIAKNIQYF	TRBV4-3*01	TRBJ2-4*01
CASSLVGRERVF	TRBV7-2*01	TRBJ2-1*01
CASSPGTPNQPQHF	TRBV11-2*01	TRBJ1-5*01
CASSVPSGVPHF	TRBV7-2*01	TRBJ2-7*01
CASSQESLAGTTDTQYF	TRBV4-1*01	TRBJ2-3*01
CASSLALGQGYGYTF	TRBV11-1*01	TRBJ1-2*01
CASSQGLSGLAGTDTQYF	TRBV4-1*01	TRBJ2-3*01
CASSQEMGGKHTGELFF	TRBV3-1*01	TRBJ2-2*01
CASSYGTGVTYEQYF	TRBV5-1*01	TRBJ2-7*01
CASSFGAGGSYEQYF	TRBV7-9*01	TRBJ2-7*01
CASSPTSGSPGELFF	TRBV7-3*01	TRBJ2-2*01
CASSTPGLRNNEQFF	TRBV19*01	TRBJ2-1*01
CASLPQGTEGYTF	TRBV28*01	TRBJ1-2*01
CASSFSPGRVTDTQYF	TRBV5-1*01	TRBJ2-3*01
CASSLDGFSYEQYF	TRBV5-1*01	TRBJ2-7*01
CASSAGDSANTGELFF	TRBV2*01	TRBJ2-2*01
CASSFGGPTYEQYF	TRBV7-8*01	TRBJ2-7*01
CSVEVGGLSGRKTQYF	TRBV29-1*01	TRBJ2-5*01
CASSSGNTIYF	TRBV27*01	TRBJ1-3*01
CSAREMGDEWPQHF	TRBV20-1*01	TRBJ1-5*01
CSVLRGRSPIDEQYF	TRBV29-1*01	TRBJ2-7*01
CASSFLAGVSEQFF	TRBV28*01	TRBJ2-1*01
CASSFQGYGTEAFF	TRBV27*01	TRBJ1-1*01
CASSFRDGSYEQYF	TRBV27*01	TRBJ2-7*01
CASREGDSPLHF	TRBV12-4*01	TRBJ1-6*01
CASSFSSGSYNEQFF	TRBV12-4*01	TRBJ2-1*01
CASSLTQGENEQYF	TRBV7-9*01	TRBJ2-7*01
CASSLPDRDGTDTQYF	TRBV5-1*01	TRBJ2-3*01
CATSRTQGVTYNEQFF	TRBV15*01	TRBJ2-1*01
CASSQTRTGTEAFF	TRBV14*01	TRBJ1-1*01
CASSQDRAGGLFGTQYF	TRBV4-1*01	TRBJ2-5*01
CASSQDGFTSPEFF	TRBV3-1*01	TRBJ1-4*01
CASVAGGDNQPQHF	TRBV6-1*01	TRBJ1-5*01
CASSPAGGPSSTDTQYF	TRBV11-2*01	TRBJ2-3*01
CASSPGTKNYGYTF	TRBV18*01	TRBJ1-2*01
CASRAGLRSADTQYF	TRBV12-4*01	TRBJ2-3*01
CASSSLAGSDTQYF	TRBV7-9*01	TRBJ2-3*01
CASSPVEGALSGYTF	TRBV7-9*01	TRBJ1-2*01
CSVEEVRVAYNEQFF	TRBV29-1*01	TRBJ2-1*01
CASSRGTSGTYEQYF	TRBV7-9*01	TRBJ2-7*01
CASSTSGGTSYEQYF	TRBV6-6*01	TRBJ2-7*01
CSVGGGAGYTF	TRBV29-1*01	TRBJ1-2*01
CASSQVTATDTQYF	TRBV4-3*01	TRBJ2-3*01
CASSQEGTLPRYRQETQYF	TRBV4-2*01	TRBJ2-5*01
CASSNSLSETQYF	TRBV6-1*01	TRBJ2-5*01
CASSFTGEQFF	TRBV11-2*01	TRBJ2-1*01
CASSSDVQETQYF	TRBV7-3*01	TRBJ2-5*01
CAISESLPEQFF	TRBV10-3*01	TRBJ2-1*01
CASSSGTSGYNEQFF	TRBV5-4*01	TRBJ2-1*01
CASGLGVNTEAFF	TRBV12-5*01	TRBJ1-1*01
CASSRTNTEAFF	TRBV5-1*01	TRBJ1-1*01
CASSPTGSGTEAFF	TRBV4-1*01	TRBJ1-1*01
CASSQGPASGNTIYF	TRBV14*01	TRBJ1-3*01
CASSRNPGLAANNEQFF	TRBV7-2*01	TRBJ2-1*01
CASSPENTEAFF	TRBV4-1*01	TRBJ1-1*01
CASSPMAGGNNEQFF	TRBV5-1*01	TRBJ2-1*01
CASSLRGAGDTQYF	TRBV5-1*01	TRBJ2-3*01
CASSKGQGAGEQYF	TRBV7-7*01	TRBJ2-7*01
CSAYSPSGNTEAFF	TRBV20-1*01	TRBJ1-1*01
CASSLAPTQPQHF	TRBV5-1*01	TRBJ1-5*01
CASSLSPSGLQETQYF	TRBV5-1*01	TRBJ2-5*01
CSAVPGQGGNSPLHF	TRBV20-1*01	TRBJ1-6*01
CASSVEGQYEQYF	TRBV9*01	TRBJ2-7*01
CSAFRQGLNSPLHF	TRBV20-1*01	TRBJ1-6*01
CASSIVLTDNSKQPQHF	TRBV19*01	TRBJ1-5*01
CASSYTRLAGLNTGELFF	TRBV6-1*01	TRBJ2-2*01
CASSMPGLAKETQYF	TRBV18*01	TRBJ2-5*01
CASSPRGSGGNTQYF	TRBV6-6*01	TRBJ2-3*01
CASSLQRQGEETQYF	TRBV7-9*01	TRBJ2-5*01
CASSESIRVYEQYF	TRBV6-1*01	TRBJ2-7*01
CASSYLTGTNTEAFF	TRBV6-5*01	TRBJ1-1*01
CASSLEDSNQPQHF	TRBV7-9*01	TRBJ1-5*01
CASSLGLDTDTQYF	TRBV5-1*01	TRBJ2-3*01
CASGLSLTGHYNQPQHF	TRBV12-5*01	TRBJ1-5*01
CSANVDTQYF	TRBV20-1*01	TRBJ2-3*01
CASRIGGIDTQYF	TRBV6-1*01	TRBJ2-3*01
CASRRTGQQETQYF	TRBV2*01	TRBJ2-5*01
CASSLGQANTEAFF	TRBV7-2*01	TRBJ1-1*01
CASRGTSGRQNEQYF	TRBV27*01	TRBJ2-7*01
CASSILGLAKYNEQFF	TRBV11-2*01	TRBJ2-1*01
CASRGRPSTDTQYF	TRBV6-5*01	TRBJ2-3*01
CASSHESGPSYNEQFF	TRBV4-1*01	TRBJ2-1*01
CASSLQTSPPRGWTDTQYF	TRBV27*01	TRBJ2-3*01
CASSLDGRVPEAFF	TRBV11-2*01	TRBJ1-1*01
CASSLSATNEKLFF	TRBV28*01	TRBJ1-4*01
CASSLGSGARDEKLFF	TRBV5-1*01	TRBJ1-4*01
CASSPDRGNEKLFF	TRBV28*01	TRBJ1-4*01
CATRDRGSLGYGYTF	TRBV19*01	TRBJ1-2*01
CASSLGRSEQFF	TRBV7-8*01	TRBJ2-1*01
CSARTGGKNEQYF	TRBV20-1*01	TRBJ2-7*01
CASSRNRGSTNEKLFF	TRBV12-4*01	TRBJ1-4*01
CASSLRRVGEQYF	TRBV7-2*01	TRBJ2-7*01
CASSRTSGDLTDTQYF	TRBV14*01	TRBJ2-3*01
CASSSGLNTEAFF	TRBV6-5*01	TRBJ1-1*01
CSAMGVVRNSPLHF	TRBV20-1*01	TRBJ1-6*01
CAISEQNEQYF	TRBV10-3*01	TRBJ2-7*01
CATRATSGSRDEQFF	TRBV24-1*01	TRBJ2-1*01
CASSLENEQFF	TRBV5-1*01	TRBJ2-1*01
CASSRTGSGANVLTF	TRBV11-2*01	TRBJ2-6*01
CASSQGRDSEQFF	TRBV3-1*01	TRBJ2-1*01
CASSWRVQETQYF	TRBV27*01	TRBJ2-5*01
CASSLEPSGKETQYF	TRBV5-4*01	TRBJ2-5*01
CSARQFPDSPLHF	TRBV20-1*01	TRBJ1-6*01
CASRAHDYSNQPQHF	TRBV27*01	TRBJ1-5*01
CASSSGQVWEPLHF	TRBV12-4*01	TRBJ1-6*01
CASSRGLAVDSYEQYF	TRBV6-1*01	TRBJ2-7*01
CASSFSSEAFF	TRBV5-6*01	TRBJ1-1*01
[truncated: 20 more rows]
