# Supplementary material for: The clonal structure and dynamics of the human T cell response to an organic chemical hapten
Source: eLife journal article supplement (doi:10.7554/elife.54747), 2021-01-12
Supplement: supp [file elife_poa_e54747_Supplementary_file_4.docx]

**Supplementary File 4**

Supplementary Figure 3: Dynamic changes in TCR frequency following sensitisation. (A) The abundances of the PT1 expanded (threshold ≥ 8) alpha TCRs at the four time points: PS, PT1, PT2, PT3. Each panel is a different patient (n=10). (B) The abundances of the PT2 expanded (threshold ≥ 8) alpha TCRs at the four time points: PS, PT1, PT2, PT3. Each panel is a different patient (n=10). (C) Equivalent time points (0 weeks, 2 weeks and 6 weeks) for four healthy volunteers for whom we had all three times points. Top row is PT1 expanded alpha TCRs; bottom row is PT2 expanded alpha TCRs. The fourth volunteer had no PT1 expanded alpha TCRs. The fifth volunteer had no PT1 expanded alpha TCRs and no PT2 alpha sample.
