# Supplementary material for: The clonal structure and dynamics of the human T cell response to an organic chemical hapten
Source: eLife journal article supplement (doi:10.7554/elife.54747), 2021-01-12
Supplement: supp [file elife_poa_e54747_Supplementary_file_5.docx]

Supplementary File 5


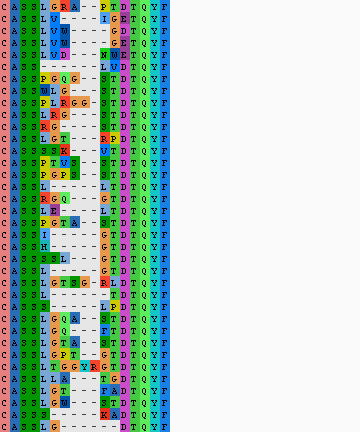


Supplementary Figure 4: Sequence alignment of the CDR3 sequences from the largest cluster of TCR alpha PT1 expanded CDR3s. The CDR3s of the largest cluster of PT1 expanded CDR3 beta sequences (see Figure 6D and E) were aligned using the MUSCLE alignment algorithm in Aliview (https://ormbunkar.se/aliview/).
